# Supplementary material for: Nickel-catalyzed dynamic kinetic cross-electrophile coupling of benzylic alcohols and alkenyl triflates
Source: Royal Society of Chemistry journal article supplement (doi:10.1039/d3qo01416a), 2023-11-14

# **Nickel-Catalyzed Dynamic Kinetic Cross-Electrophile Coupling of Benzylic Alcohols and Alkenyl Triflates**

Xuejing Peng,<sup>a</sup> Jingxian Huang,<sup>a</sup> Guan-Yu Han,<sup>a</sup> Xing-Zhong Shu<sup>a,\*</sup>

<sup>a</sup>State Key Laboratory of Applied Organic Chemistry (SKLAOC), College of Chemistry and Chemical Engineering, Lanzhou University, 222 South Tianshui Road, Lanzhou, 730000, China.

## **Table of Contents**

|                                                                                                      |                 |
|------------------------------------------------------------------------------------------------------|-----------------|
| <b>1. General Information.....</b>                                                                   | <b>S2</b>       |
| <b>2. Synthesis of Substrates.....</b>                                                               | <b>S3-S5</b>    |
| <b>3. Optimization of Reaction Parameters.....</b>                                                   | <b>S6-S9</b>    |
| <b>4. Nickel-catalyzed Cross-Electrophile Coupling of Benzyl Alcohols and Alkenyl Triflates.....</b> | <b>S10-S35</b>  |
| <b>5. Mechanistic Investigation.....</b>                                                             | <b>S36-S39</b>  |
| <b>6. References.....</b>                                                                            | <b>S40-S42</b>  |
| <b>7. Copies of NMR Spectra.....</b>                                                                 | <b>S43-S103</b> |

## 1. General Information

### Reagents and solvents

Unless otherwise stated, all chemicals used in the preparation of starting materials were commercially available and were used as received without further purification. All catalysts, reductants, ligands were purchased from Acros, Alfa Aesar, Aldrich, Ark Pharm, and Strem. Other chemicals were purchased from Adamas, TCI, and Energy chemicals, and were directly used without further purifications.

Anhydrous *N, N*-dimethylformamide (DMF), *N, N*-dimethylacetamide (DMA), Tetrahydrofuran (THF) were purified using a solvent-purification system by passing through activated alumina columns or molecular sieves. Other solvents were dried and purified according to the procedure from "Purification of Laboratory Chemicals".<sup>1</sup>

<sup>1</sup>H and <sup>13</sup>C NMR spectra were collected on a Bruker AVANCE III 400MHz, JEOL JNM-ECS 400 MHz, BRUKER AVANCE NEO 600 MHz, and Agilent-NMR-Inova 600 MHz spectrometer at room temperature. All <sup>1</sup>H NMR spectra were reported in parts per million (ppm) downfield of tetramethylsilane (TMS) and were referenced to the signal of TMS (0 ppm). All <sup>13</sup>C NMR spectra were reported in ppm relative to residual CHCl<sub>3</sub> (77.16 ppm). Coupling constants, *J*, are reported in hertz (Hz). <sup>19</sup>F NMR spectra were also collected on Bruker AVANCE III 400 MHz spectrometers at room temperature. Melting points were determined on a microscopic apparatus. IR spectra were collected using Bruker-TENSOR 27 spectrometer and Agilent Technologies Cary 630 FTIR, and only major peaks were reported in cm<sup>-1</sup>. HRMS was performed on Bruker Apex II FT-ICR mass instrument (ESI) and AB TripleTOF 5600plus Mass Spectrometry (ACPI). GC analysis was performed on Thermo Scientific TRACE 1300. GC-MS data were collected on Thermo Scientific TRACE DSQ GC-MS. Thin layer chromatography was carried out using XINNUO SGF 254 TLC plates. Flash chromatography was performed using XINNUO silica gel (200-300 mesh).

## 2. Synthesis of Substrates

### 2.1 Benzyl alcohols

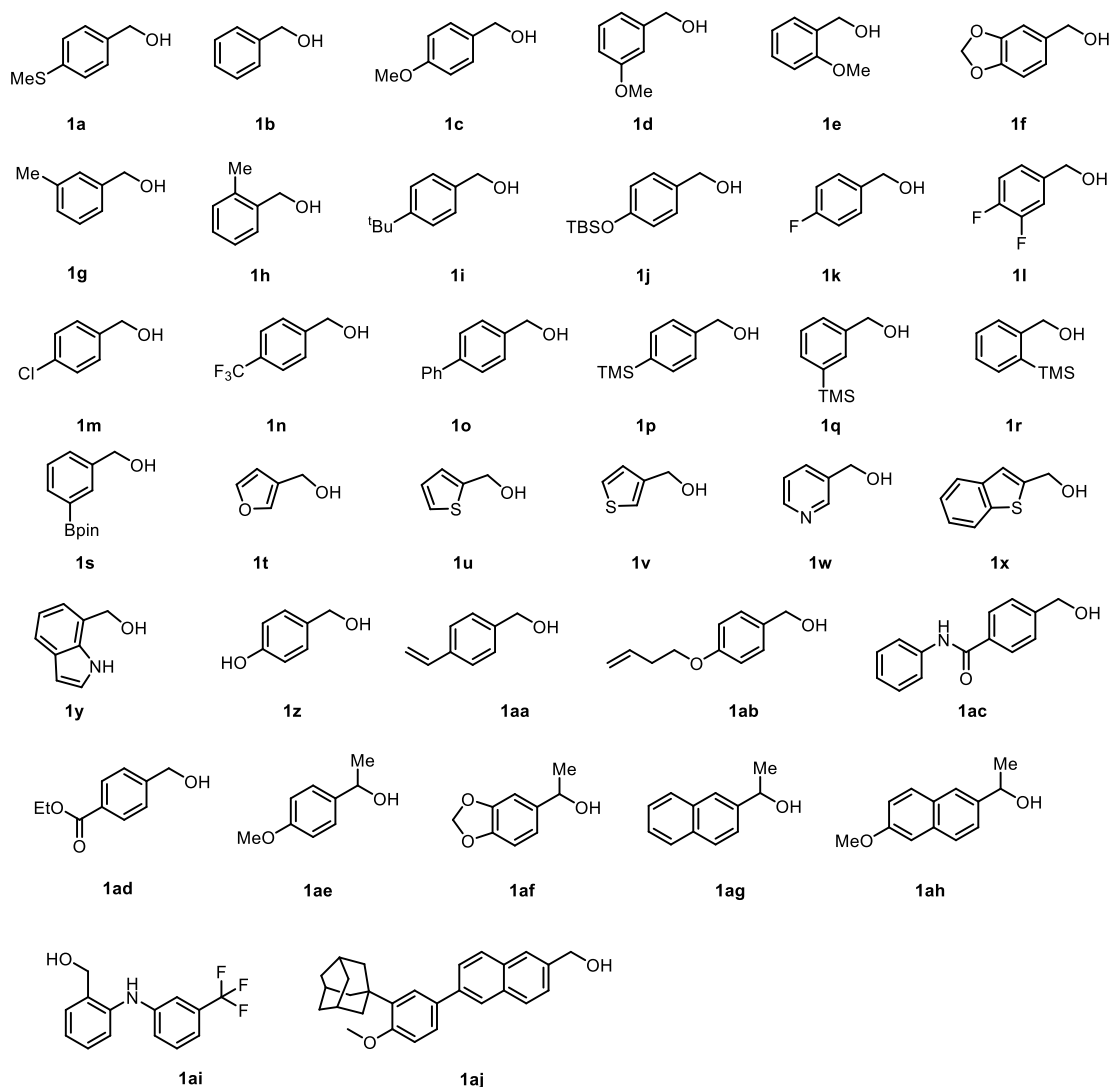

**Benzyl alcohols:** 1a-1o, 1s-1aa are commercially available. Compounds **1p**,<sup>2</sup> **1q**,<sup>2</sup> **1r**,<sup>2</sup> **1ab**,<sup>3</sup> **1ac**,<sup>4</sup> **1ad**,<sup>5</sup> **1ae**,<sup>6</sup> **1af**,<sup>7</sup> **1ag**,<sup>8</sup> **1ah**,<sup>9</sup> are known compounds, and they were synthesized according to the literature procedure. The preparation of new compounds and their characterization data are provided as follows.

#### General procedure A:<sup>2</sup>

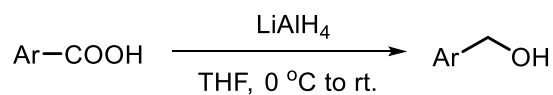

To a solution of acid (10 mmol, 1.0 equiv) in THF (50 mL) was added LiAlH<sub>4</sub> (760 mg, 20 mmol, 2.0 equiv) at 0 °C. The reaction solution was refluxed for two hours and then cooled down to room temperature. A solution of NaOH (10% in water) was added carefully until a white solid precipitated. The reaction mixture was extracted with EtOAc (30 mL × 3). The combined organic layers were dried over anhydrous Na<sub>2</sub>SO<sub>4</sub>, filtered, and concentrated under reduced pressure. The residue was purified by flash chromatography on silica gel to afford corresponding benzyl alcohol.

**(2-((3-(Trifluoromethyl)phenyl)amino)phenyl)methanol (1ai)**

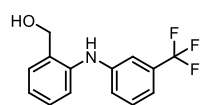

This compound was prepared from flufenamic acid (2.81 g, 10 mmol) according to General procedure A. It was purified by flash chromatography on silica gel (PE/EA = 3/1). 1.21 g, 45% yield, colorless oil.

**<sup>1</sup>H NMR (600 MHz, CDCl<sub>3</sub>):** δ 7.37-7.31 (m, 2 H), 7.28-7.21 (m, 3 H), 7.19-7.17 (m, 1 H), 7.12 (d, *J* = 5.2 Hz, 1 H), 6.99-6.94 (m, 2 H), 4.70 (s, 2 H), 1.94 (s, 1 H).

**<sup>13</sup>C NMR (150 MHz, CDCl<sub>3</sub>):** δ 143.9, 142.1, 131.9 (q, *J* = 19.0 Hz), 130.0, 129.9, 129.5, 124.3 (q, *J* = 179.0 Hz), 121.8, 120.4, 118.0, 117.0 (q, *J* = 3.0 Hz), 117.0, 113.9 (q, *J* = 3.0 Hz), 64.6.

**<sup>19</sup>F NMR (376 MHz, CDCl<sub>3</sub>):** δ -62.8.

**IR (neat, cm<sup>-1</sup>):** 3528, 3439, 2937, 2363, 1619, 1588, 1496, 1428, 1338, 1124, 1070, 997, 867, 788, 699.

**HRMS (ESI):** [M+H]<sup>+</sup> calcd for C<sub>14</sub>H<sub>13</sub>F<sub>3</sub>NO 268.0944, found: 268.0941.

**(6-(3-((1*R*,3*R*,5*S*)-adamantan-1-yl)-4-methoxyphenyl)naphthalen-2-yl)methanol (1aj)**

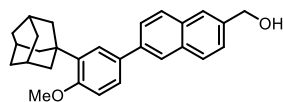

This compound was prepared from adapalene (4.12 g, 10 mmol) according to General procedure A. It was purified by flash chromatography on silica gel (PE/EA = 5/1). 2.71 g, 68% yield, white solid, mp: 179-180 °C.

**<sup>1</sup>H NMR (600 MHz, CDCl<sub>3</sub>):** δ 7.97 (s, 1 H), 7.87 (dd, *J* = 10.2, 8.4 Hz, 2 H), 7.80 (s, 1 H), 7.73 (dd, *J* = 8.4, 7.8 Hz, 1 H), 7.59 (d, *J* = 8.4 Hz, 1 H), 7.52 (dd, *J* = 8.4, 2.4 Hz,



1 H), 7.48 (dd,  $J = 8.4, 1.2$  Hz, 1 H), 7.25 (s, 1 H), 6.98 (d,  $J = 8.4$  Hz, 1 H), 4.85 (s, 2 H), 3.89 (s, 3 H), 2.19 (d,  $J = 3.0$  Hz, 6 H), 2.11-2.09 (m, 3 H), 1.81-1.89 (m, 6 H).

**$^{13}\text{C}$  NMR (150 MHz,  $\text{CDCl}_3$ ):**  $\delta$  158.7, 139.2, 139.0, 138.1, 133.5, 133.2, 132.3, 128.7, 128.4, 126.2, 126.0, 125.7, 125.7, 125.4, 125.0, 112.2, 65.7, 55.3, 40.8, 37.3, 37.3, 29.3.

**IR (neat,  $\text{cm}^{-1}$ ):** 3519, 2907, 2850, 1636, 1498, 1478, 1459, 1238, 1142, 1029, 882.

**HRMS (ESI):**  $[\text{M}+\text{Na}]^+$  calcd for  $\text{C}_{28}\text{H}_{30}\text{NaO}_2$  421.2138, found: 421.2130.

## 2.2 Alkenyl Electrophiles

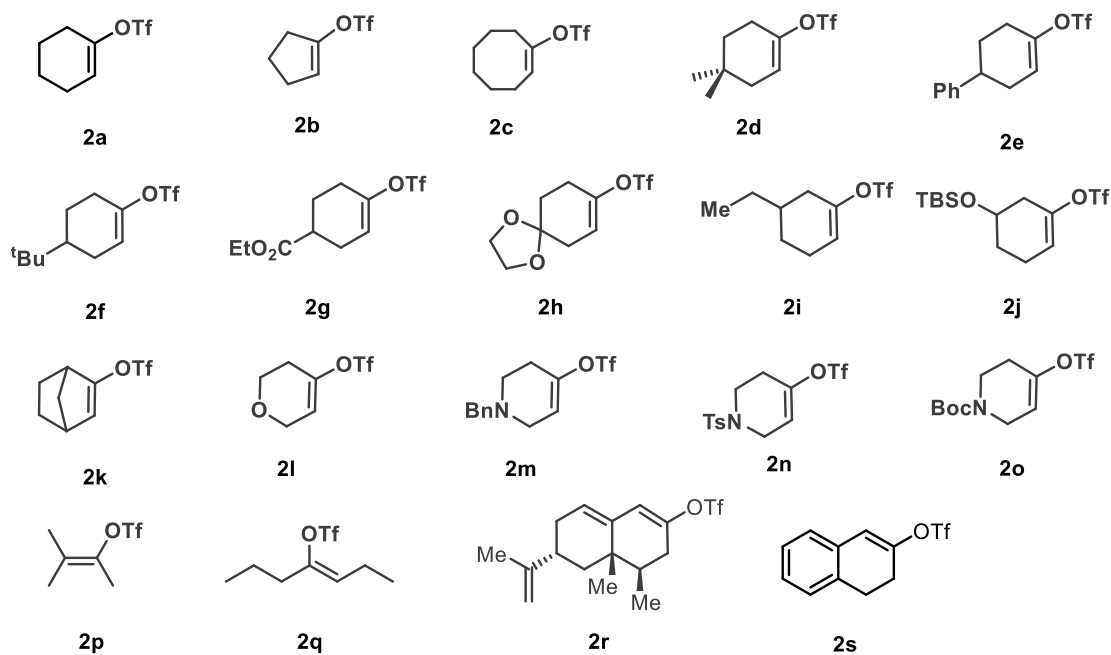

Alkenyl triflates **2a**,<sup>10</sup> **2b**,<sup>10</sup> **2c**,<sup>10</sup> **2d**,<sup>11</sup> **2e**,<sup>12</sup> **2f**,<sup>10</sup> **2g**,<sup>13</sup> **2h**,<sup>10</sup> **2i**,<sup>10</sup> **2j**,<sup>10</sup> **2k**,<sup>14</sup> **2l**,<sup>10</sup> **2m**,<sup>15</sup> **2n**,<sup>10</sup> **2o**,<sup>12</sup> **2p**,<sup>16</sup> **2q**,<sup>10</sup> **2r**,<sup>16</sup> **2s**<sup>17</sup> are known compounds, and they were synthesized according to the literature procedure.

### 3. Optimization of Reaction Parameters

#### General Procedure B

The procedure was conducted in an argon-filled glove box. To a reaction tube equipped with a magnetic stir bar was charged with catalyst (10 mol%, 0.01 mmol), ligand (20 mol%, 0.02 mmol), reductant (3.0 equiv, 0.3 mmol), diethyl oxalate (DEO, 1.5 equiv, 0.15 mmol) and solvent (0.33 mL, 0.3M). Substrates **1a** (15.4 mg, 0.1 mmol) and **2a** (34.5 mg, 0.15 mmol) were then added. The reaction tube was sealed and removed from the glove box. The reaction mixture was stirred at 50 °C for 24 h. The reaction was quenched with water (10 mL), and the mixture was extracted with ethyl acetate (3 × 10 mL). The combined organic layers were washed with water, brine, dried over anhydrous Na<sub>2</sub>SO<sub>4</sub>. A 0.2 mL of solution was collected and diluted with ethyl acetate (1 mL). The yield of **3a** was determined by GC analysis versus the internal standard (dodecane).

**Scheme S1. Reaction of 1a and 2a under the standard conditions for the arylation reactions**

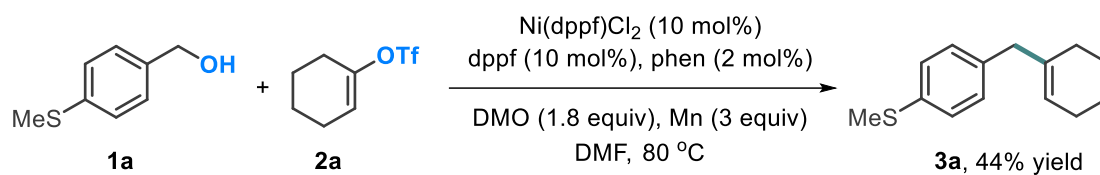

**Table S1. Optimization of reaction conditions<sup>a</sup>**

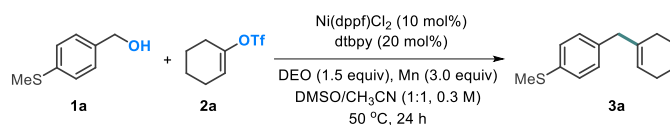

| entry | change from standard conditions                            | <b>3a</b> (%)        |
|-------|------------------------------------------------------------|----------------------|
| 1     | none                                                       | 98 (94) <sup>b</sup> |
| 2     | NiCl <sub>2</sub> instead of Ni(dppf)Cl <sub>2</sub>       | trace                |
| 3     | Ni(COD) <sub>2</sub> instead of Ni(dppf)Cl <sub>2</sub>    | trace                |
| 4     | No dtbpy                                                   | trace                |
| 5     | Ni(dppp)Cl <sub>2</sub> instead of Ni(dppf)Cl <sub>2</sub> | 68                   |
| 6     | DMF                                                        | 79                   |
| 7     | DMSO                                                       | 43                   |
| 8     | CH <sub>3</sub> CN                                         | 7                    |
| 9     | Zn instead of Mn                                           | 65                   |
| 10    | DMO instead of DEO                                         | 82                   |
| 11    | no DEO, Ni or Mn                                           | 0                    |

<sup>a</sup>Reaction conditions: **1a** (0.1 mmol) and **2a** (0.15 mmol) were used; the yields were determined by NMR analysis using CH<sub>2</sub>Br<sub>2</sub> as an internal standard; DEO: diethyl oxalate. <sup>b</sup>Isolated yield in parentheses is obtained from **1a** (0.2 mmol) and **2a** (0.3 mmol).

**Table S2. Optimization of ligand for the reaction of 1a and 2a<sup>a</sup>**

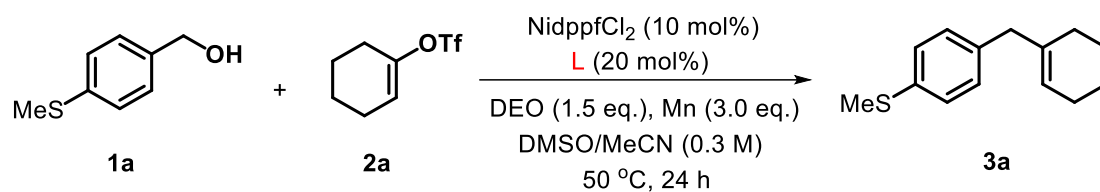

| entry | ligand (mol%) | yield of <b>3a</b> (%) |
|-------|---------------|------------------------|
| 1     | L1            | 52                     |
| 2     | L2            | 78                     |
| 3     | L3            | 98(94) <sup>b</sup>    |
| 4     | L4            | 24                     |
| 5     | L5            | 8                      |
| 6     | L6            | 18                     |
| 7     | L7            | 34                     |
| 8     | L8            | 26                     |
| 9     | L9            | 0                      |

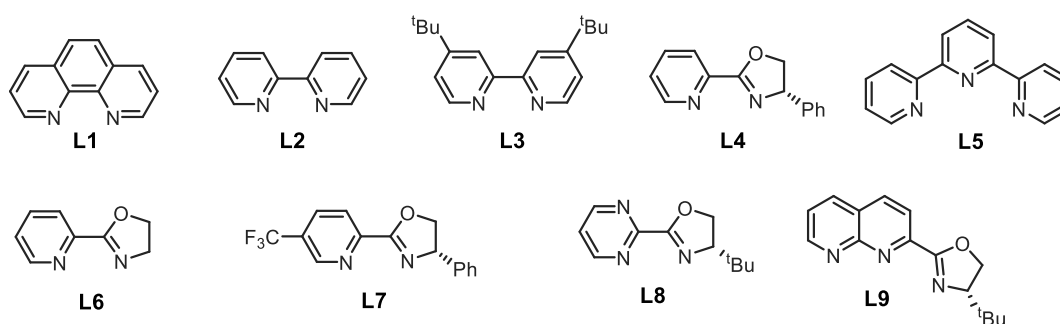

<sup>a</sup>**1a** (0.1 mmol, 1.0 equiv), **2a** (0.15 mmol, 1.5 equiv), yields were determined by GC analysis with dodecane as an internal standard. <sup>b</sup>Isolated yield in parentheses is obtained from **1a** (0.2 mmol) and **2a** (0.3 mmol).

**Table S3. Optimization of catalyst for the reaction of **1a** and **2a****

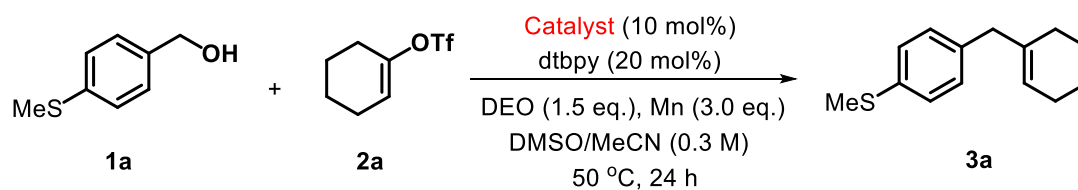

| entry | catalyst                                                   | yield of <b>3a</b> (%) |
|-------|------------------------------------------------------------|------------------------|
| 1     | NiCl <sub>2</sub>                                          | trace                  |
| 2     | NiBr <sub>2</sub>                                          | Trace                  |
| 3     | NiI <sub>2</sub>                                           | 0                      |
| 4     | NiBr <sub>2</sub> (diglyme)                                | 12                     |
| 5     | NiCl <sub>2</sub> (dme)                                    | 0                      |
| 6     | Ni(dppe)Cl <sub>2</sub>                                    | 63                     |
| 7     | Ni(dppp)Cl <sub>2</sub>                                    | 68                     |
| 8     | Ni(dppp)Cl <sub>2</sub>                                    | 68                     |
| 9     | Ni(dppf)Cl <sub>2</sub>                                    | 98                     |
| 10    | Ni(dtbpy)Cl <sub>2</sub> with no ligand                    | trace                  |
| 11    | Ni(dtbpy)Cl <sub>2</sub> , dppf (10 mol%) instead of dtbpy | 70                     |
| 12    | Ni(COD) <sub>2</sub>                                       | Trace                  |
| 13    | Ni(PMe <sub>3</sub> ) <sub>2</sub> Cl <sub>2</sub>         | 45                     |
| 14    | Ni(OTf) <sub>2</sub>                                       | 0                      |
| 15    | CoBr <sub>2</sub>                                          | 0                      |
| 16    | CoCl <sub>2</sub>                                          | 0                      |

<sup>a</sup>**1a** (0.1 mmol, 1.0 equiv), **2a** (0.15 mmol, 1.5 equiv), yields were determined by GC analysis with dodecane as an internal standard.

## 4. Nickel-catalyzed Cross-Electrophile Coupling of Benzyl Alcohols and Alkenyl Triflates

### 4.1 General procedure C

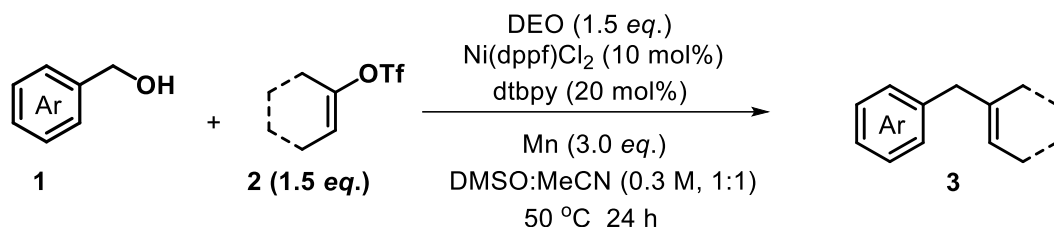

The procedure was conducted in an argon-filled glove box. To a reaction tube equipped with a magnetic stir bar was charged with Ni(dppf)Cl<sub>2</sub> (13.5 mg, 0.02 mmol), dtbpy (10.7 mg, 0.04 mmol), Mn (33 mg, 0.6 mmol), DEO (43.8 mg, 0.3 mmol) and DMSO/MeCN (1:1, 0.66 mL, 0.3 M). Substrates **1** (0.2 mmol) and **2** (0.3 mmol) were then added. The reaction tube was sealed with a rubber septum, and removed from the glove box. The reaction mixture was stirred at 50 °C for 24 h. The reaction was quenched with water (10 mL), and the mixture was extracted with ethyl acetate (3 × 20 mL). The combined organic layers were washed with water, brine, dried over anhydrous Na<sub>2</sub>SO<sub>4</sub>, and concentrated under reduced pressure. The residue was purified by flash chromatography on silica gel to afford the desired product **3**.

### 4.2 General procedure D

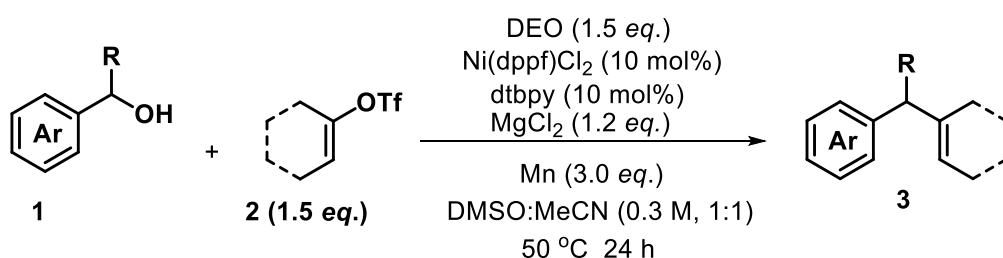

The procedure was conducted in an argon-filled glove box. To a reaction tube equipped with a magnetic stir bar was charged with Ni(dppf)Cl<sub>2</sub> (13.5 mg, 0.02 mmol), dtbpy (5.4 mg, 0.02 mmol), Mn (33 mg, 0.6 mmol), MgCl<sub>2</sub> (22.5 mg, 0.24 mmol), DEO (43.8 mg, 0.3 mmol) and DMSO/MeCN (1:1, 0.66 mL, 0.3 M). Substrates **1** (0.2 mmol) and **2** (0.3 mmol) were then added. The reaction tube was sealed with a rubber septum, and removed from the glove box. The reaction mixture was stirred at 50 °C for 24 h. The

reaction was quenched with water (10 mL), and the mixture was extracted with ethyl acetate (3 × 20 mL). The combined organic layers were washed with water, brine, dried over anhydrous Na<sub>2</sub>SO<sub>4</sub>, and concentrated under reduced pressure. The residue was purified by flash chromatography on silica gel to afford the desired product **3**.

## 4.2 Characterization Data of Products

### (4-(Cyclohex-1-en-1-ylmethyl)phenyl)(methyl)sulfane (3a)

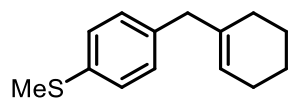

This compound was prepared according to General procedure C from the reaction of **1a** (30.8 mg, 0.2 mmol) and **2a** (69.0 mg, 0.3 mmol). It was purified by flash chromatography on silica gel (PE/EA = 100/1). 41.1 mg, 94% yield. colorless oil.

**<sup>1</sup>H NMR (600 MHz, CDCl<sub>3</sub>):**  $\delta$  7.19 (d,  $J$  = 8.4 Hz, 2 H), 7.09 (d,  $J$  = 7.8 Hz, 2 H), 5.45 (s, 1 H), 3.20 (s, 2 H), 2.46 (s, 3 H), 2.02-2.00 (m, 2 H), 1.85-1.83 (m, 2 H), 1.59-1.51 (m, 4 H).

**<sup>13</sup>C NMR (150 MHz, CDCl<sub>3</sub>):**  $\delta$  137.7, 137.2, 135.4, 129.6, 127.1, 123.1, 44.3, 28.2, 25.5, 23.0, 22.5, 16.4.

**IR (neat, cm<sup>-1</sup>):** 3038, 2922, 2857, 2835, 1668, 1638, 1600, 1493, 1437, 1403, 1288, 1094, 1018, 919, 805.

**HRMS (ESI):** [M+H]<sup>+</sup> calcd for C<sub>14</sub>H<sub>19</sub>S 219.1202, found: 219.1211.

### (Cyclohex-1-en-1-ylmethyl)benzene (3b)

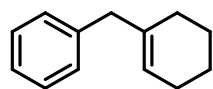

This compound was prepared according to General procedure C from the reaction of **1b** (21.6 mg, 0.2 mmol) and **2a** (69.0 mg, 0.3 mmol). It was purified by flash chromatography on silica gel (PE/EA = 100/1). 19.3 mg, 56% yield, a colorless liquid. <sup>1</sup>H NMR and <sup>13</sup>C NMR data agree with those reported in ref. 18.

**<sup>1</sup>H NMR (400 MHz, CDCl<sub>3</sub>):**  $\delta$  7.29-7.23 (m, 2 H), 7.16 (d,  $J$  = 6.8 Hz, 3 H), 5.49-5.42 (m, 1 H), 3.23 (s, 2 H), 2.06-1.97 (m, 2 H), 1.85 (s, 2 H), 1.61-1.50 (m, 4 H).

**<sup>13</sup>C NMR (100 MHz, CDCl<sub>3</sub>):**  $\delta$  140.6, 137.4, 129.0, 128.3, 126.0, 123.1, 44.8, 28.2, 25.5, 23.1, 22.6.

### 1-(Cyclohex-1-en-1-ylmethyl)-4-methoxybenzene (3c)

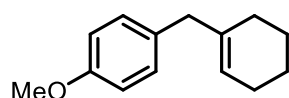

This compound was prepared according to General procedure C from the reaction of **1c** (27.6 mg, 0.2 mmol) and **2a** (69.0 mg, 0.3 mmol). It was purified by flash chromatography on silica gel (PE/EA = 100/1). 34.4 mg, 85% yield, a colorless liquid. <sup>1</sup>H NMR and <sup>13</sup>C NMR data are consistent with



those reported in ref. 19.

**<sup>1</sup>H NMR (400 MHz, CDCl<sub>3</sub>):** δ 7.07 (d, *J* = 8.4 Hz, 2 H), 6.81 (d, *J* = 8.5 Hz, 2 H), 5.43 (s, 1 H), 3.77 (s, 3 H), 3.17 (s, 2 H), 2.00 (d, *J* = 1.4 Hz, 2 H), 1.84 (s, 2 H), 1.60-1.49 (m, 4 H).

**<sup>13</sup>C NMR (100 MHz, CDCl<sub>3</sub>):** δ 158.0, 137.7, 132.6, 129.9, 122.7, 113.7, 55.3, 43.9, 28.1, 25.5, 23.1, 22.6.

**1-(Cyclohex-1-en-1-ylmethyl)-3-methoxybenzene (3d)**

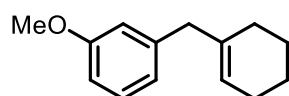

This compound was prepared according to General procedure C from the reaction of **1d** (27.6 mg, 0.2 mmol) and **2a** (69.0 mg, 0.3 mmol). It was purified by flash chromatography on silica gel (PE/EA = 100/1). 31.6 mg, 78% yield. colorless oil.

**<sup>1</sup>H NMR (400 MHz, CDCl<sub>3</sub>):** δ 7.21-7.16 (m, 1 H), 6.78-6.72 (m, 3 H), 5.47 (s, 1 H), 3.79 (s, 3 H), 3.21 (s, 2 H), 2.03-2.00 (m, 2 H), 1.87-1.84 (m, 2 H), 1.61-1.51 (m, 4 H).

**<sup>13</sup>C NMR (100 MHz, CDCl<sub>3</sub>):** δ 159.7, 142.3, 137.1, 129.2, 123.2, 121.5, 114.8, 111.1, 55.2, 44.8, 28.1, 25.5, 23.1, 22.5.

**IR (neat, cm<sup>-1</sup>):** 3047, 3000, 2928, 2857, 2836, 2365, 1726, 1601, 1454, 1437, 1282, 1258, 1154, 1053, 919, 768.

**HRMS (ESI):** [M+H]<sup>+</sup> calcd for C<sub>14</sub>H<sub>19</sub>O 203.1430, found: 203.1424.

**1-(Cyclohex-1-en-1-ylmethyl)-2-methoxybenzene (3e)**

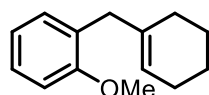

This compound was prepared according to General procedure C from the reaction of **1e** (27.6 mg, 0.2 mmol) and **2a** (69.0 mg, 0.3 mmol). It was purified by flash chromatography on silica gel (PE/EA = 100/1). 32.4 mg, 80% yield. colorless oil.

**<sup>1</sup>H NMR (600 MHz, CDCl<sub>3</sub>):** δ 7.17 (td, *J* = 8.0, 1.7 Hz, 1 H), 7.11 (dd, *J* = 7.4, 1.4 Hz, 1 H), 6.89 (td, *J* = 7.4, 0.8 Hz, 1 H), 6.85 (d, *J* = 8.2 Hz, 1 H), 5.39-5.38 (m, 1 H), 3.80 (s, 3 H), 3.25 (s, 2 H), 2.00-1.99 (m, 2 H), 1.93-1.90 (m, 2 H), 1.61-1.54 (m, 4 H).

**<sup>13</sup>C NMR (150 MHz, CDCl<sub>3</sub>):** δ 157.8, 136.9, 130.2, 129.1, 127.1, 122.6, 120.5, 110.6, 55.6, 37.6, 28.5, 25.5, 23.2, 22.6.

**IR (neat, cm<sup>-1</sup>):** 3066, 3025, 3000, 2924, 2836, 1728, 1640, 1588, 1463, 1493, 1290,

1243, 1174, 1075, 1051, 948, 751.

**HRMS (ESI):**  $[M+H]^+$  calcd for  $C_{14}H_{19}O$  203.1430, found: 203.1424.

**5-(Cyclohex-1-en-1-ylmethyl)benzo[d][1,3]dioxole (3f)**

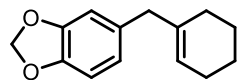

This compound was prepared according to General procedure C from the reaction of **1f** (30.8 mg, 0.2 mmol) and **2a** (69.0 mg, 0.3 mmol). It was purified by flash chromatography on silica gel (PE/EA = 50/1). 31.1 mg, 72% yield. colorless oil.

**$^1H$  NMR (600 MHz,  $CDCl_3$ ):**  $\delta$  6.72 (d,  $J$  = 7.8 Hz, 1 H), 6.67 (d,  $J$  = 1.2 Hz, 1 H), 6.62-6.61 (m, 1 H), 5.91 (s, 2 H), 5.46 (s, 1 H), 3.15 (s, 2 H), 2.02-2.01 (m, 2 H), 1.85-1.83 (m, 2 H), 1.59-1.53 (m, 4 H).

**$^{13}C$  NMR (150 MHz,  $CDCl_3$ ):**  $\delta$  147.6, 145.8, 137.48, 134.5, 123.1, 121.8, 109.4, 108.1, 100.86, 44.5, 28.1, 25.5, 23.1, 22.6.

**IR (neat,  $cm^{-1}$ ):** 2928, 2859, 2838, 2376, 1504, 1442, 1359, 1245, 1187, 1042, 939, 867.

**HRMS (ESI):**  $[M+H]^+$  calcd for  $C_{14}H_{17}O_2$  217.1223, found: 217.1227.

**1-(Cyclohex-1-en-1-ylmethyl)-3-methylbenzene (3g)**

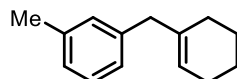

This compound was prepared according to General procedure C from the reaction of **1g** (24.4 mg, 0.2 mmol) and **2a** (69.0 mg, 0.3 mmol). It was purified by flash chromatography on silica gel (PE/EA = 100/1). 28.0 mg, 75% yield. colorless oil.

**$^1H$  NMR (600 MHz,  $CDCl_3$ ):**  $\delta$  7.16 (t,  $J$  = 7.2 Hz, 1 H), 7.00-6.96 (m, 3 H), 5.45 (s, 1 H), 3.20 (s, 2 H), 2.32 (s, 3 H), 2.03-2.01 (m, 2 H), 1.87-1.84 (m, 2 H), 1.59-1.52 (m, 4 H).

**$^{13}C$  NMR (150 MHz,  $CDCl_3$ ):**  $\delta$  140.5, 137.8, 137.5, 129.9, 128.2, 126.7, 126.1, 122.9, 44.8, 28.2, 25.5, 23.1, 22.6, 21.6.

**IR (neat,  $cm^{-1}$ ):** 3474, 3019, 2928, 2859, 2838, 1608, 1489, 1437, 1144, 1082, 785, 766, 703.

**HRMS (APCI):**  $[M+H]^+$  calcd for  $C_{14}H_{19}$  187.1481, found: 187.1482.

**1-(Cyclohex-1-en-1-ylmethyl)-2-methylbenzene (3h)**

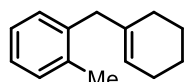

This compound was prepared according to General procedure C from the reaction of **1h** (24.4 mg, 0.2 mmol) and **2a** (69.0 mg, 0.3 mmol). It was purified by flash chromatography on silica gel (PE/EA = 100/1). 24.9 mg, 67% yield. colorless oil.

**<sup>1</sup>H NMR (600 MHz, CDCl<sub>3</sub>):** δ 7.14-7.09 (m, 4 H), 5.27-5.25 (m, 1 H), 3.23 (s, 2 H), 2.26 (s, 3 H), 1.99-1.97 (m, 2 H), 1.91- 1.87 (m 2 H), 1.63-1.59 (m, 2 H), 1.57-1.52 (m, 2 H).

**<sup>13</sup>C NMR (150 MHz, CDCl<sub>3</sub>):** δ 138.5, 137.0, 136.3, 130.1, 129.9, 126.1, 125.8, 122.7, 41.9, 28.8, 25.5, 23.2, 22.7, 19.6.

**IR (neat, cm<sup>-1</sup>):** 3066, 3017, 2926, 2859, 2838, 1908, 1646, 1605, 1493, 1446, 1342, 1079, 1051, 949, 779.

**HRMS (APCI):** [M+H]<sup>+</sup> calcd for C<sub>14</sub>H<sub>19</sub> 187.1481, found: 187.1486.

**1-(Tert-butyl)-4-(cyclohex-1-en-1-ylmethyl)benzene (3i)**

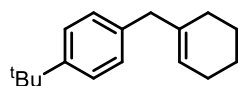

This compound was prepared according to General procedure C from the reaction of **1i** (32.8 mg, 0.2 mmol) and **2a** (69.0 mg, 0.3 mmol). It was purified by flash chromatography on silica gel (PE/EA = 100/1). 29.6 mg, 65% yield. colorless oil.

**<sup>1</sup>H NMR (400 MHz, CDCl<sub>3</sub>):** δ 7.30-7.28 (m, 2 H), 7.11-7.09 (m, 2 H), 5.47-5.44 (m, 1 H), 3.21 (s, 2 H), 2.04-2.00 (m, 2 H), 2.00-1.85 (m, 2 H), 1.61-1.52 (m, 4 H), 1.31 (s, 9 H).

**<sup>13</sup>C NMR (100 MHz, CDCl<sub>3</sub>):** δ 148.7, 137.5, 128.6, 125.2, 122.9, 44.3, 34.5, 31.6, 28.3, 25.5, 23.1, 22.6.

**IR (neat, cm<sup>-1</sup>):** 2961, 2926, 2857, 1634, 1515, 1413, 1364, 1269, 1202, 1131, 954, 818, 794.

**HRMS (APCI):** [M+H]<sup>+</sup> calcd for C<sub>17</sub>H<sub>25</sub> 229.1951, found: 229.1955.

**Tert-butyl(4-(cyclohex-1-en-1-ylmethyl)phenoxy)dimethylsilane (3j)**

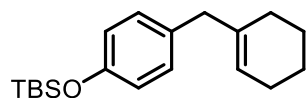

This compound was prepared according to General procedure C from the reaction of **1j** (47.6 mg, 0.2 mmol) and **2a** (69.0 mg, 0.3 mmol). It was purified by flash chromatography on silica gel (PE/EA = 100/1).

41.7 mg, 69% yield. colorless oil.

**<sup>1</sup>H NMR (600 MHz, CDCl<sub>3</sub>):** δ 7.00 (d, *J* = 8.4 Hz, 2 H), 6.74 (d, *J* = 8.4 Hz, 2 H), 5.42 (s, 1 H), 3.16 (s, 2 H), 2.01-2.00 (m, 2 H), 1.84 (s, 2 H), 1.58-1.53 (m, 4 H), 0.98 (s, 9 H), 0.18 (s, 6 H).

**<sup>13</sup>C NMR (150 MHz, CDCl<sub>3</sub>):** δ 153.8, 137.8, 133.2, 129.9, 122.6, 119.8, 44.0, 28.1, 25.8, 25.5, 23.1, 22.6, 18.3, -4.3.

**IR (neat, cm<sup>-1</sup>):** 2930, 2959, 1609, 1508, 1466, 1265, 1096, 917, 836, 756.

**HRMS (ESI):** [M+H]<sup>+</sup> calcd for C<sub>19</sub>H<sub>31</sub>OSi: 303.2139, found: 303.2136.

#### 1-(Cyclohex-1-en-1-ylmethyl)-4-fluorobenzene (3k)

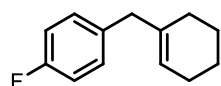

This compound was prepared according to General procedure C from the reaction of **1k** (25.2 mg, 0.2 mmol) and **2a** (69.0 mg, 0.3 mmol). It was purified by flash chromatography on silica gel (PE/EA = 100/1). 26.6 mg, 70% yield. colorless oil.

**<sup>1</sup>H NMR (400 MHz, CDCl<sub>3</sub>):** δ 7.13-7.09 (m, 2 H), 6.98-6.92 (m, 2 H), 5.45-5.43 (m, 1 H), 3.20 (s, 2 H), 2.03-1.99 (m, 2 H), 1.85-1.81 (m, 2 H), 1.61-1.50 (m, 4 H).

**<sup>13</sup>C NMR (100 MHz, CDCl<sub>3</sub>):** δ 161.5 (d, *J* = 242 Hz), 137.3, 136.1 (d, *J* = 3.0 Hz), 130.3 (d, *J* = 7.0 Hz), 123.2, 115.0 (d, *J* = 21.0 Hz), 44.0, 28.1, 25.5, 23.0, 22.5.

**<sup>19</sup>F NMR (376 MHz, CDCl<sub>3</sub>):** δ -117.86.

**IR (neat, cm<sup>-1</sup>):** 3045, 3000, 2932, 2861, 2838, 1886, 1720, 1605, 1510, 1439, 1223, 1157, 1094, 1018, 855, 823.

**HRMS (APCI):** [M+H]<sup>+</sup> calcd for C<sub>13</sub>H<sub>16</sub>F 191.1231, found: 191.1239.

#### 4-(Cyclohex-1-en-1-ylmethyl)-1,2-difluorobenzene (3l)

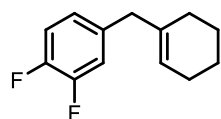

This compound was prepared according to General procedure C from the reaction of **1l** (28.8 mg, 0.2 mmol) and **2a** (69.0 mg, 0.3 mmol). It was purified by flash chromatography on silica gel (PE/EA = 100/1). 19.6 mg, 47% yield. colorless oil.

**<sup>1</sup>H NMR (600 MHz, CDCl<sub>3</sub>):** δ 7.06-7.02 (m, 1 H), 6.98-6.95 (m, 1 H), 6.88-6.85 (m, 1 H), 5.47 (s, 1 H), 3.18 (s, 2 H), 2.04-2.01 (m, 2 H), 1.83-1.80 (m, 2 H), 1.60-1.53 (m, 4 H).

**<sup>13</sup>C NMR (150 MHz, CDCl<sub>3</sub>):** δ 150.1 (dd, *J* = 246.0, 13.5 Hz), 148.8 (dd, *J* = 244.5, 13.5 Hz), 137.5 (dd, *J*<sub>1</sub> = 4.5, 3.0 Hz), 136.5, 124.6 (dd, *J* = 6.0, 3.0 Hz), 123.8, 117.4 (d, *J* = 16.5 Hz), 116.7 (d, *J* = 16.5 Hz), 43.8, 27.9, 25.3, 22.8, 22.3.

**<sup>19</sup>F NMR (376 MHz, CDCl<sub>3</sub>):** δ -138.78, -142.46.

**IR (neat, cm<sup>-1</sup>):** 3047, 3002, 2930, 2861, 2838, 1608, 1519, 1437, 1176, 1280, 1038, 1135, 965, 874.

**HRMS (APCI):** [M+H]<sup>+</sup> calcd for C<sub>13</sub>H<sub>16</sub>F<sub>2</sub> 209.1136, found: 209.1141.

**Chloro-4-(cyclohex-1-en-1-ylmethyl)benzene (3m)**

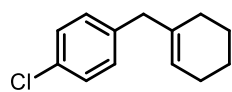

This compound was prepared according to General procedure C from the reaction of **1m** (28.4 mg, 0.2 mmol) and **2a** (69.0 mg, 0.3 mmol). It was purified by flash chromatography on silica gel (PE/EA = 100/1). 18.5 mg, 45% yield. colorless oil.

**<sup>1</sup>H NMR (600 MHz, CDCl<sub>3</sub>):** δ 7.23 (d, *J* = 8.4 Hz, 2 H), 7.09 (d, *J* = 8.4 Hz, 2 H), 5.45 (s, 1 H), 3.19 (s, 2 H), 2.01 (s, 2 H), 1.83-1.81 (m, 2 H), 1.59-1.53 (m, 4 H).

**<sup>13</sup>C NMR (150 MHz, CDCl<sub>3</sub>):** δ 139.1, 137.0, 131.7, 130.4, 128.4, 123.5, 44.2, 28.2, 25.5, 23.1, 22.5.

**IR (neat, cm<sup>-1</sup>):** 2935, 2866, 2371, 1720, 1657, 1493, 1407, 1375, 1279, 1092, 1015, 986, 807, 758.

**HRMS (APCI):** [M+H]<sup>+</sup> calcd for C<sub>13</sub>H<sub>16</sub>Cl 207.0935, found: 207.0938.

**1-(Cyclohex-1-en-1-ylmethyl)-4-(trifluoromethyl)benzene (3n)**

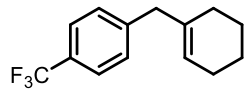

This compound was prepared according to General procedure C from the reaction of **1n** (35.2 mg, 0.2 mmol) and **2a** (69.0 mg, 0.3 mmol). It was purified by flash chromatography on silica gel (PE/EA = 100/1). 24.5 mg, 51% yield. colorless oil.

**<sup>1</sup>H NMR (400 MHz, CDCl<sub>3</sub>):** δ 7.52 (d, *J* = 8.0 Hz, 2 H), 7.28 (d, *J* = 8.0 Hz, 2 H), 5.48 (s, 1 H), 3.28 (s, 2 H), 2.05-2.01 (m, 2 H), 1.85-1.82 (m, 2 H), 1.60-1.53 (m, 4 H).

**<sup>13</sup>C NMR (100 MHz, CDCl<sub>3</sub>):** δ 144.8, 136.5, 129.3, 128.4 (q, *J* = 32 Hz), 125.3 (q, *J* = 4 Hz), 124.6 (q, *J* = 271 Hz), 124.0, 44.6, 28.2, 25.5, 23.0, 22.5.

**<sup>19</sup>F NMR (376 MHz, CDCl<sub>3</sub>):** δ -62.26.

**IR (neat, cm<sup>-1</sup>):** 3049, 3002, 2932, 2861, 2840, 1918, 1735, 1620, 1374, 1262, 1068, 920, 822.

**HRMS (ACPI):** [M+H]<sup>+</sup> calcd for C<sub>14</sub>H<sub>16</sub>F<sub>3</sub> 241.1199, found: 241.1189.

**4-(Cyclohex-1-en-1-ylmethyl)-1,1'-biphenyl (3o)**

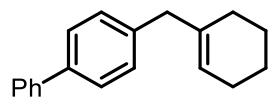

This compound was prepared according to General procedure C from the reaction of **1o** (36.8 mg, 0.2 mmol) and **2a** (69.0 mg, 0.3 mmol). It was purified by flash chromatography on silica gel (PE/EA = 100/1). 45.7 mg, 92% yield. colorless oil. <sup>1</sup>H NMR and <sup>13</sup>C NMR data are consistent with those reported in ref. 20.

**<sup>1</sup>H NMR (400 MHz, CDCl<sub>3</sub>):** δ 7.59-7.56 (m, 2 H), 7.51-7.49 (m, 2 H), 7.43-7.39 (m, 2 H), 7.33-7.29 (m, 1 H), 7.24 (d, *J* = 8.0 Hz, 2 H), 5.51-5.49 (m, 1 H), 3.27 (s, 2 H), 2.05-2.01 (m, 2 H), 1.91-1.87 (m, 2 H), 1.61-1.54 (m, 4 H).

**<sup>13</sup>C NMR (100 MHz, CDCl<sub>3</sub>):** δ 141.3, 139.7, 138.9, 137.3, 129.4, 128.8, 127.1, 127.1, 123.2, 44.5, 28.3, 25.5, 23.1, 22.6.

**(4-(Cyclohex-1-en-1-ylmethyl)phenyl)trimethylsilane (3p)**

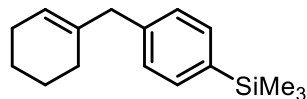

This compound was prepared according to General procedure C from the reaction of **1p** (36.0 mg, 0.2 mmol) and **2a** (69.0 mg, 0.3 mmol). It was purified by flash chromatography on silica gel (PE/EA = 100/1). 22.9 mg, 47% yield. colorless oil.

**<sup>1</sup>H NMR (600 MHz, CDCl<sub>3</sub>):** δ 7.35 (d, *J* = 7.2 Hz, 1 H), 7.31 (s, 1 H), 7.27 (t, *J* = 7.4 Hz, 1 H), 7.16 (d, *J* = 7.8 Hz, 1 H), 5.46 (s, 1 H), 3.24 (s, 2 H), 2.02 (s, 2 H), 1.87 (s, 2 H), 1.59-1.54 (m, 4 H), 0.26 (s, 9 H).

**<sup>13</sup>C NMR (150 MHz, CDCl<sub>3</sub>):** δ 140.3, 139.7, 137.3, 134.1, 131.0, 129.5, 127.7, 123.1, 44.9, 28.3, 25.5, 23.1, 22.6, -0.9.

**IR (neat, cm<sup>-1</sup>):** 3034, 3014, 2956, 2928, 2838, 1601, 1439, 1396, 1249, 1131, 1109, 837, 725.

**HRMS (APCI):** [M+H]<sup>+</sup> calcd for C<sub>16</sub>H<sub>25</sub>Si 245.1720, found: 245.1727.

**(3-(Cyclohex-1-en-1-ylmethyl)phenyl)trimethylsilane (3q)**

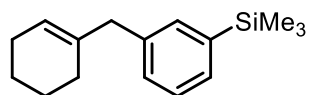

This compound was prepared according to General procedure C from the reaction of **1q** (36.0 mg, 0.2 mmol) and **2a** (69.0 mg, 0.3 mmol). It was purified by flash chromatography on silica gel (PE/EA = 100/1). 36.1 mg, 74% yield. colorless oil.

**<sup>1</sup>H NMR (600 MHz, CDCl<sub>3</sub>):**  $\delta$  7.34 (d,  $J$  = 7.2 Hz, 1 H), 7.30 (s, 1 H), 7.27 (t,  $J$  = 7.2 Hz, 1 H), 7.16 (d,  $J$  = 7.2 Hz, 1 H), 5.46 (s, 1 H), 3.24 (s, 2 H), 2.04-2.0 (m, 2 H), 1.88-1.85 (m, 2 H), 1.60-1.53 (m, 4 H), 0.26 (s, 9 H).

**<sup>13</sup>C NMR (150 MHz, CDCl<sub>3</sub>):**  $\delta$  140.3, 139.7, 137.3, 134.1, 131.0, 129.5, 127.7, 123.1, 44.9, 28.3, 25.5, 23.1, 22.6.

**IR (neat, cm<sup>-1</sup>):** 3541, 3466, 3047, 2958, 2930, 2838, 1638, 1439, 1407, 1249, 1116, 919, 880, 839, 751, 708.

**HRMS (APCI):** [M+H]<sup>+</sup> calcd for C<sub>16</sub>H<sub>25</sub>Si 245.1720, found: 245.1717.

**(2-(Cyclohex-1-en-1-ylmethyl)phenyl)trimethylsilane (3r)**

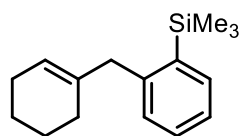

This compound was prepared according to General procedure C from the reaction of **1r** (36.0 mg, 0.2 mmol) and **2a** (69.0 mg, 0.3 mmol). It was purified by flash chromatography on silica gel (PE/EA = 100/1). 19.5 mg, 40% yield. colorless oil.

**<sup>1</sup>H NMR (400 MHz, CDCl<sub>3</sub>):**  $\delta$  7.49-7.47 (m, 1 H), 7.32-7.28 (m, 1 H), 7.20-7.16 (m, 2 H), 5.24-5.21 (m, 1 H), 3.37 (s, 2 H), 2.02-1.98 (m, 2 H), 1.90-1.88 (s, 2 H), 1.64-1.57 (m, 4 H), 0.3 (s, 9 H).

**<sup>13</sup>C NMR (100 MHz, CDCl<sub>3</sub>):**  $\delta$  145.7, 139.1, 137.6, 134.5, 129.2, 129.1, 125.3, 124.0, 44.3, 29.0, 25.5, 23.2, 22.7, 0.50.

**IR (neat, cm<sup>-1</sup>):** 2922, 2857, 1625, 1590, 1459, 1439, 1249, 1122, 850, 727.

**HRMS (APCI):** [M+H]<sup>+</sup> calcd for C<sub>16</sub>H<sub>25</sub>Si 245.1720, found: 245.1727.

**2-(3-(Cyclohex-1-en-1-ylmethyl)phenyl)-4,4,5,5-tetramethyl-1,3,2-dioxaborolane (3s)**

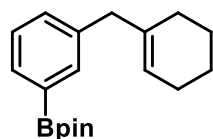

This compound was prepared according to General procedure C from the reaction of **1s** (46.8 mg, 0.2 mmol) and **2a** (69.0 mg, 0.3 mmol). It was purified by flash chromatography on silica gel (PE/EA

= 100/1). 26.5 mg, 77% yield. colorless oil.

**<sup>1</sup>H NMR (400 MHz, CDCl<sub>3</sub>):** δ 7.65-7.63 (m, 1 H), 7.60 (s, 1 H), 7.31-7.26 (m, 2 H), 5.43 (s, 1 H), 3.24 (s, 2 H), 2.00 (s, 2 H), 1.85 (s, 2 H), 1.60-1.51 (m, 4 H), 1.35 (s, 12 H).

**<sup>13</sup>C NMR (100 MHz, CDCl<sub>3</sub>):** δ 139.8, 137.4, 135.6, 132.5, 132.0, 127.8, 123.0, 83.9, 44.7, 31.3, 28.3, 25.5, 25.0, 23.1, 22.6.

**IR (neat, cm<sup>-1</sup>):** 3055, 2982, 2924, 2859, 2838, 1608, 1425, 1388, 1321, 1271, 1146, 967, 889.

**HRMS (ESI):** [M+Na]<sup>+</sup> calcd for C<sub>19</sub>H<sub>27</sub>BO<sub>2</sub>Na 321.1996, found: 321.2022.

### 2-(Cyclohex-1-en-1-ylmethyl)furan (3t)

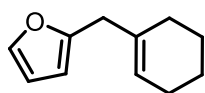

This compound was prepared according to General procedure C from the reaction of **1t** (19.6 mg, 0.2 mmol) and **2a** (69.0 mg, 0.3 mmol).

It was purified by flash chromatography on silica gel (PE/EA = 100/1). 23.7 mg, 73% yield. colorless oil.

**<sup>1</sup>H NMR (400 MHz, CDCl<sub>3</sub>):** δ 7.34 (s, 1 H), 7.21 (s, 1 H), 6.24 (s, 1 H), 5.47 (s, 1 H), 3.03 (s, 2 H), 2.02-1.97 (m, 2 H), 1.92-1.88 (m, 2 H), 1.61-1.52 (m, 4 H).

**<sup>13</sup>C NMR (100 MHz, CDCl<sub>3</sub>):** δ 142.7, 139.6, 136.6, 123.4, 122.4, 111.7, 33.6, 28.3, 25.4, 23.1, 22.6.

**IR (neat, cm<sup>-1</sup>):** 2965, 2926, 2853, 1634, 1459, 1262, 1094, 1019, 798.

**HRMS (ESI):** [M+H]<sup>+</sup> calcd for C<sub>11</sub>H<sub>15</sub>O 163.1117, found: 163.1110.

### 2-(Cyclohex-1-en-1-ylmethyl)thiophene (3u)

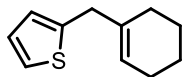

This compound was prepared according to General procedure C from the reaction of **1u** (22.8 mg, 0.2 mmol) and **2a** (69.0 mg, 0.3 mmol). It

was purified by flash chromatography on silica gel (PE/EA = 100/1). 21.4 mg, 60% yield. colorless oil.

**<sup>1</sup>H NMR (400 MHz, CDCl<sub>3</sub>):** δ 7.10 (dd, *J* = 5.2, 1.2 Hz, 1 H), 6.85 (dd, *J* = 5.2, 3.6 Hz, 1 H), 6.72-6.71 (m, 1 H), 5.48 (s, 1 H), 3.36 (s, 2 H), 1.97-1.94 (m, 2 H), 1.87-1.84 (m, 2 H), 1.54-1.47 (m, 4 H).

**<sup>13</sup>C NMR (100 MHz, CDCl<sub>3</sub>):** δ 144.0, 136.9, 126.8, 125.1, 123.6, 123.4, 38.7, 28.0,



25.4, 23.1, 22.5.

**IR (neat, cm<sup>-1</sup>):** 2928, 2861, 2837, 2374, 1832, 1655, 1439, 1290, 1265, 1038, 950, 801, 693.

**HRMS (ESI):** [M+H]<sup>+</sup> calcd for C<sub>11</sub>H<sub>15</sub>S 179.0889, found: 179.0890.

**3-(Cyclohex-1-en-1-ylmethyl)thiophene (3v)**

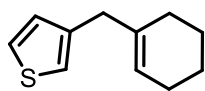

This compound was prepared according to General procedure C from the reaction of **1v** (22.8 mg, 0.2 mmol) and **2a** (69.0 mg, 0.3 mmol). It was purified by flash chromatography on silica gel (PE/EA = 100/1). 23.4 mg, 66% yield. colorless oil.

**<sup>1</sup>H NMR (400 MHz, CDCl<sub>3</sub>):** δ 7.22 (dd, *J* = 4.8, 2.8 Hz 1 H), 6.93-6.70 (m, 2 H), 5.46 (s, 1 H), 3.24 (s, 2 H), 2.03-1.99 (m, 2 H), 1.90-1.87 (m, 2 H), 1.63-1.55 (m, 4 H).

**<sup>13</sup>C NMR (100 MHz, CDCl<sub>3</sub>):** δ 141.1, 137.0, 128.9, 125.1, 122.8, 121.0, 39.1, 28.3, 25.4, 23.1, 22.6.

**IR (neat, cm<sup>-1</sup>):** 3047, 3000, 2930, 2859, 2836, 1638, 1437, 1388, 1295, 1239, 1129, 1045, 958, 855, 760.

**HRMS (ESI):** [M+Na]<sup>+</sup> calcd for C<sub>11</sub>H<sub>14</sub>NaS 201.0708, found: 241.0726.

**3-(Cyclohex-1-en-1-ylmethyl)pyridine (3w)**

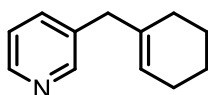

This compound was prepared according to General procedure C from the reaction of **1w** (21.8 mg, 0.2 mmol) and **2a** (69.0 mg, 0.3 mmol). It was purified by flash chromatography on silica gel (PE/EA = 5/1). 23.5 mg, 68% yield. colorless oil.

**<sup>1</sup>H NMR (400 MHz, CDCl<sub>3</sub>):** δ 8.44 (s, 2 H), 7.49 (d, *J* = 7.8 Hz, 1 H), 7.21 (dd, *J* = 7.8, 4.2 Hz, 1 H), 5.47 (s, 1 H), 3.23 (s, 2 H), 2.03-2.00 (s, 2 H), 1.86-1.83 (m, 2 H), 1.53-1.6 (m, 4 H).

**<sup>13</sup>C NMR (100 MHz, CDCl<sub>3</sub>):** δ 150.5, 147.5, 136.3, 136.4, 135.8, 124.0, 123.3, 41.8, 30.7, 28.2 25.4, 22.9, 22.4.

**IR (neat, cm<sup>-1</sup>):** 3084, 3049, 2928, 2859, 2837, 1726, 1575, 1422, 1342, 1265, 1077, 1027, 959, 716.

**HRMS (ESI):** [M+H]<sup>+</sup> calcd for C<sub>12</sub>H<sub>16</sub>N 174.1277, found: 174.1290.

### 2-(Cyclohex-1-en-1-ylmethyl)benzo[b]thiophene (3x)

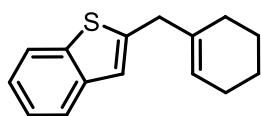

This compound was prepared according to General procedure C from the reaction of **1x** (32.8 mg, 0.2 mmol) and **2a** (69.0 mg, 0.3 mmol). It was purified by flash chromatography on silica gel (PE/EA = 100/1). 31.9 mg, 70% yield. colorless oil.

**<sup>1</sup>H NMR (600 MHz, CDCl<sub>3</sub>):**  $\delta$  7.74 (d,  $J$  = 7.8 Hz, 1 H), 7.65 (d,  $J$  = 8.4 Hz, 1 H), 7.29 (t,  $J$  = 7.2 Hz, 1H), 7.23 (d,  $J$  = 8.4 Hz, 1 H), 7.00 (s, 1 H), 5.63 (s, 1H), 3.50 (s, 2 H), 2.06-2.04 (m, 2 H), 1.97-1.95 (m, 2 H), 1.62-1.55 (m, 4 H).

**<sup>13</sup>C NMR (150 MHz, CDCl<sub>3</sub>):**  $\delta$  145.3, 140.4, 139.9, 136.3, 124.1, 124.1, 123.5, 122.9, 122.3, 121.5, 39.7, 28.0, 25.4, 23.0, 22.4.

**IR (neat, cm<sup>-1</sup>):** 3058, 3000, 2920, 2857, 2835, 2369, 1901, 1675, 1457, 1437, 1280, 1223, 1131, 1066, 969, 820, 745.

**HRMS (ESI):** [M+H]<sup>+</sup> calcd for C<sub>15</sub>H<sub>17</sub>S 229.1045, found: 229.1055.

### 7-(Cyclohex-1-en-1-ylmethyl)-1H-indole (3y)

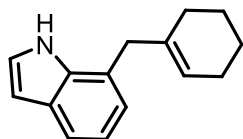

This compound was prepared according to General procedure C from the reaction of **1y** (29.4 mg, 0.2 mmol) and **2a** (69.0 mg, 0.3 mmol). It was purified by flash chromatography on silica gel (PE/EA = 10/1). 21.5 mg, 51% yield. colorless oil.

**<sup>1</sup>H NMR (400 MHz, CDCl<sub>3</sub>):**  $\delta$  8.32 (s, 1 H), 7.52 (d,  $J$  = 7.2 Hz, 1 H), 7.15 (t,  $J$  = 2.0 Hz, 1 H), 7.05 (t,  $J$  = 7.2 Hz, 1 H), 6.97 (d,  $J$  = 4.8 Hz, 1 H), 6.53 (dd,  $J$  = 2.0, 1.6 Hz, 1 H), 5.68 (s, 1 H), 3.53 (s, 2 H), 2.05 (s, 2 H), 1.85 (s, 2 H), 1.58-1.53 (m, 4 H).

**<sup>13</sup>C NMR (100 MHz, CDCl<sub>3</sub>):**  $\delta$  137.3, 135.6, 127.9, 123.9, 123.1, 122.9, 122.5, 119.9, 119.0, 102.7, 41.8, 28.1, 25.5, 22.9, 22.5.

**IR (neat, cm<sup>-1</sup>):** 3435, 3055, 2926, 2857, 2837, 1638, 1489, 1277, 1213, 1165, 1105, 947, 846, 747.

**HRMS (ESI):** [M+H]<sup>+</sup> calcd for C<sub>15</sub>H<sub>18</sub>N 212.1434, found: 212.1436.

### 4-(Cyclohex-1-en-1-ylmethyl)phenol (3z)

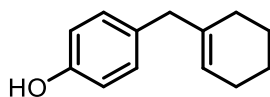

This compound was prepared according to General procedure C from the reaction of **1z** (24.8 mg, 0.2 mmol) and **2a** (69.0 mg,

0.3 mmol). It was purified by flash chromatography on silica gel (PE/EA = 5/1). 20.7 mg, 55% yield. colorless oil.

**<sup>1</sup>H NMR (600 MHz, CDCl<sub>3</sub>):** δ 6.96 (d, *J* = 8.4 Hz, 2 H), 6.67 (d, *J* = 8.4 Hz, 2 H), 5.36 (s, 1 H), 4.62 (s, 1 H), 3.09 (s, 2 H), 1.95-1.93 (m, 2 H), 1.78-1.76 (m, 2 H), 1.52-1.45 (m, 4 H).

**<sup>13</sup>C NMR (150 MHz, CDCl<sub>3</sub>):** δ 153.8, 137.7, 132.8, 130.1, 122.8, 115.1, 43.9, 28.1, 25.5, 23.1, 22.6.

**IR (neat, cm<sup>-1</sup>):** 2986, 2926, 2857, 2838, 1765, 1741, 1655, 1597, 1515, 1446, 1321, 1198, 1170, 1101, 1045, 824.

**HRMS (ESI):** [M+H]<sup>+</sup> calcd for C<sub>13</sub>H<sub>17</sub>O 189.1274, found: 189.1275.

#### 1-(Cyclohex-1-en-1-ylmethyl)-4-vinylbenzene (3aa)

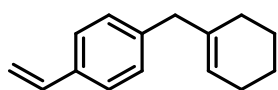

This compound was prepared according to General procedure C from the reaction of **1aa** (26.8 mg, 0.2 mmol) and **2a** (69.0

mg, 0.3 mmol). It was purified by flash chromatography on silica gel (PE/EA = 100/1). 11.9 mg, 30% yield. colorless oil.

**<sup>1</sup>H NMR (600 MHz, CDCl<sub>3</sub>):** δ 7.33 (d, *J* = 8.4 Hz, 2 H), 7.13 (d, *J* = 7.8 Hz, 2 H), 6.70 (dd, *J* = 17.4, 10.8 Hz, 1 H), 5.71 (d, *J* = 18.0 Hz, 1 H), 5.47-5.45 (m, 1 H), 5.19 (d, *J* = 10.8 Hz, 1 H), 3.22 (s, 2 H), 2.03-2.00 (m, 2 H), 1.86-1.84 (m, 2 H), 1.59-1.53 (m, 4 H).

**<sup>13</sup>C NMR (150 MHz, CDCl<sub>3</sub>):** δ 140.4, 137.3, 136.9, 135.4, 129.2, 126.2, 123.2, 113.1, 44.5, 28.2, 25.5, 23.1, 22.5.

**IR (neat, cm<sup>-1</sup>):** 2959, 2927, 2859, 2369, 2339, 1655, 1638, 1510, 1459, 1407, 1262, 1096, 904, 740.

**HRMS (APCI):** [M+H]<sup>+</sup> calcd for C<sub>15</sub>H<sub>19</sub> 199.1481, found: 199.1482.

#### 1-(But-3-en-1-yloxy)-4-(cyclohex-1-en-1-ylmethyl)benzene (3ab)

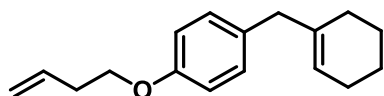

This compound was prepared according to General procedure C from the reaction of **1ab** (35.6 mg, 0.2 mmol) and **2a** (69.0 mg, 0.3 mmol). It was purified by flash chromatography on silica gel (PE/EA = 100/1). 29.5 mg, 61% yield. colorless oil.

**<sup>1</sup>H NMR (400 MHz, CDCl<sub>3</sub>):** 7.08-7.06 (m, 2 H), 6.83-6.79 (m, 2 H), 5.94-5.86 (m, 1 H), 5.43 (s, 1 H), 5.19-5.08 (m, 2 H), 4.01-3.97 (m, 2 H), 3.17 (s, 2 H), 2.56-2.51 (m, 2 H), 2.01-2.00 (m, 2 H), 1.84 (s, 2 H), 1.58-1.53 (m, 4 H).

**<sup>13</sup>C NMR (100 MHz, CDCl<sub>3</sub>):** 157.3, 137.8, 134.7, 132.7, 129.9, 122.7, 117.1, 114.4, 67.3, 43.9, 33.9, 28.1, 25.5, 23.1, 22.6.

**IR (neat, cm<sup>-1</sup>):** 3453, 2961, 2920, 1490, 1440, 1244, 1186, 1094, 1041, 934, 807.

**HRMS (ESI):** [M+H]<sup>+</sup> calcd for C<sub>17</sub>H<sub>23</sub>O 243.1743, found: 243.1742

#### 4-(Cyclohex-1-en-1-ylmethyl)-N-phenylbenzamide (3ac)

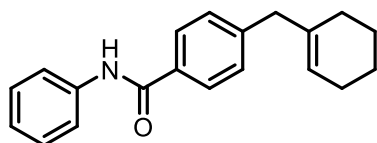

This compound was prepared according to General procedure C from the reaction of **1ac** (45.5 mg, 0.2 mmol) and **2a** (69.0 mg, 0.3 mmol). It was purified by

flash chromatography on silica gel (PE/EA = 1/1). 30.3 mg, 52% yield. colorless oil.

**<sup>1</sup>H NMR (600 MHz, CDCl<sub>3</sub>):** δ 7.85 (s, 1H), 7.78 (d, *J* = 8.2 Hz, 2H), 7.68-7.58 (m, 2H), 7.36 (dd, *J* = 8.6, 7.2 Hz, 2H), 7.28 (d, *J* = 8.2 Hz, 2H), 7.17-7.11 (m, 1H), 5.49-5.48 (m, 1H), 3.29 (s, 2H), 2.05-2.01 (m, 2H), 1.85-1.83 (m, 2H), 1.60-1.54 (m, 4H).

**<sup>13</sup>C NMR (150 MHz, CDCl<sub>3</sub>):** δ 165.9, 145.1, 138.2, 136.6, 132.7, 129.4, 129.2, 127.1, 124.6, 123.9, 120.3, 44.7, 28.2, 25.5, 23.0, 22.4.

**IR (neat, cm<sup>-1</sup>):** 3339, 3009, 1651, 1601, 1529, 1440, 1322, 1268, 918, 757.

**HRMS (ESI):** [M+Na]<sup>+</sup> calcd for C<sub>20</sub>H<sub>21</sub>NNaO 314.1515, found: 314.1521.

#### Ethyl 4-(cyclohex-1-en-1-ylmethyl)benzoate (3ad)

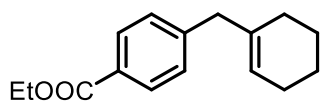

This compound was prepared according to General procedure C from the reaction of **1ad** (36.0 mg, 0.2 mmol)

and **2a** (69.0 mg, 0.3 mmol). It was purified by flash chromatography on silica gel (PE/EA = 20/1). 26.4 mg, 54% yield. colorless oil.

**<sup>1</sup>H NMR (400 MHz, CDCl<sub>3</sub>):** δ 7.88 (d, *J* = 8.0, 2 H), 7.16 (d, *J* = 8.0, 2 H), 5.40 (s, 1 H), 4.29 (q, *J* = 7.2 Hz, 2 H), 3.21 (s, 2 H), 1.97-1.92 (m, 2 H), 1.77-1.73 (m, 2 H), 1.52-1.45 (m, 4 H), 1.38 (t, *J* = 6.8 Hz, 3 H).

**<sup>13</sup>C NMR (100 MHz, CDCl<sub>3</sub>):** δ 166.9, 146.1, 136.6, 129.6, 129.0, 128.4, 123.8, 60.9, 44.8, 28.2, 25.5, 23.0, 22.5, 14.5.

**IR (neat, cm<sup>-1</sup>):** 2987, 2926, 2859, 2838, 2367, 2346, 1720, 1638, 1612, 1459, 1438, 1416, 1275, 1176, 1101, 1023, 918, 867, 752.

**HRMS (ESI):** [M+H]<sup>+</sup> calcd for C<sub>16</sub>H<sub>21</sub>O<sub>2</sub> 245.1536, found: 245.1535.

**3-(1-(4-Methoxyphenyl)ethyl)-1,2-dihydronaphthalene (3ae)**

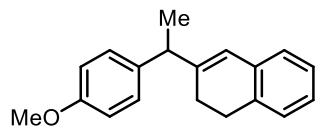

This compound was prepared according to General procedure D from the reaction of **1ae** (30.4 mg, 0.2 mmol) and **2s** (83.4 mg, 0.3 mmol). It was purified by flash chromatography on silica gel (PE/EA = 200/1). 18.5 mg, 35% yield. colorless oil.

**<sup>1</sup>H NMR (400 MHz, CDCl<sub>3</sub>):** δ 7.18-7.14 (m, 3 H), 7.09-7.04 (m, 3 H), 6.84-6.82 (m, 2 H), 6.37 (s, 1 H), 3.78 (s, 3 H), 3.52 (q, *J* = 7.2 Hz, 1 H), 2.72-2.68 (m, 2 H), 2.11-2.06 (m, 2 H), 1.44 (d, *J* = 7.2 Hz, 3 H).

**<sup>13</sup>C NMR (100 MHz, CDCl<sub>3</sub>):** δ 158.1, 145.8, 137.1, 134.9, 134.8, 128.6, 127.2, 126.5, 126.4, 125.9, 121.6, 113.8, 55.3, 45.4, 28.5, 26.5, 19.9.

**IR (neat, cm<sup>-1</sup>):** 2928, 2836, 2365, 1726, 1601, 1282, 1258, 1154, 1053, 919, 768.

**HRMS (ESI):** [M+H]<sup>+</sup> calcd for C<sub>19</sub>H<sub>21</sub>O 265.1587, found: 265.1587.

**5-(1-(3,4-Dihydronaphthalen-2-yl)ethyl)benzo[d][1,3]dioxole (3af)**

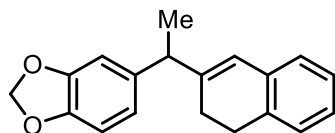

This compound was prepared according to General procedure D from the reaction of **1af** (33.2 mg, 0.2 mmol) and **2s** (83.4 mg, 0.3 mmol). It was purified by flash chromatography on silica gel (PE/EA = 100/1). 16.7 mg, 30% yield. colorless oil.

**<sup>1</sup>H NMR (600 MHz, CDCl<sub>3</sub>):** δ 7.15-7.12 (m, 1 H), 7.09-7.04 (m, 3 H), 6.74-6.70 (m, 3 H), 6.37-6.36 (m, 1 H), 5.91 (s, 2 H), 3.50-3.46 (m, 1 H), 2.75-2.66 (m, 2 H), 2.14-2.06 (m, 2 H), 1.42 (d, *J* = 7.2 Hz, 3 H).

**<sup>13</sup>C NMR (150 MHz, CDCl<sub>3</sub>):** δ 147.8, 146.0, 145.4, 139.2, 134.8, 134.8, 127.3, 126.5, 126.5, 125.9, 121.8, 120.6, 108.1, 100.9, 45.9, 28.5, 26.5, 19.9.

**IR (neat, cm<sup>-1</sup>):** 2928, 2838, 2376, 1504, 1442, 1359, 1245, 1187, 1042, 939, 867.

**HRMS (ESI):** [M+H]<sup>+</sup> calcd for C<sub>19</sub>H<sub>19</sub>O<sub>2</sub> 279.1380, found: 279.1379.

**2-(1-(Cyclohex-1-en-1-yl)ethyl)naphthalene (3ag)**

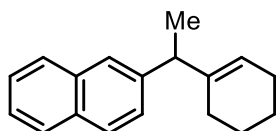

This compound was prepared according to General procedure D from the reaction of **1ag** (34.4 mg, 0.2 mmol) and **2a** (69.0 mg, 0.3 mmol). It was purified by flash chromatography on silica gel (PE/EA = 100/0). 13.7 mg, 29% yield. colorless oil.

**<sup>1</sup>H NMR (600 MHz, CDCl<sub>3</sub>):** δ 7.79-7.73 (m, 3 H), 7.62 (s, 1 H), 7.45-7.39 (m, 2 H), 7.35-7.33 (m, 1 H), 5.65-5.64 (m, 1 H), 3.47-3.43 (m, 1 H), 2.08-2.07 (m, 2 H), 1.84-1.74 (m, 2 H), 1.56-1.50 (m, 4 H), 1.42 (d, *J* = 7.2 Hz, 3 H).

**<sup>13</sup>C NMR (150 MHz, CDCl<sub>3</sub>):** δ 143.6, 141.2, 133.6, 132.2, 127.7, 127.7, 127.6, 126.6, 125.8, 125.6, 125.2, 121.1, 46.7, 27.3, 25.5, 23.2, 22.8, 19.7.

**IR (neat, cm<sup>-1</sup>):** 2961, 2857, 1634, 1413, 1269, 1202, 1131, 954, 818, 794.

**HRMS (ESI):** [M+H]<sup>+</sup> calcd for C<sub>18</sub>H<sub>21</sub> 237.1638, found: 237.1638.

#### 2-(1-(Cyclohex-1-en-1-yl)ethyl)-6-methoxynaphthalene (**3ah**)

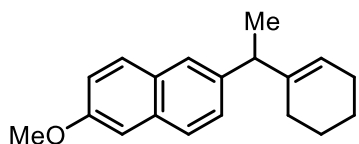

This compound was prepared according to General procedure D from the reaction of **1ah** (40.4 mg, 0.2 mmol) and **2a** (69.0 mg, 0.3 mmol). It was purified by flash

chromatography on silica gel (PE/EA = 100/0). 12.7 mg, 24% yield. colorless oil.

**<sup>1</sup>H NMR (600 MHz, CDCl<sub>3</sub>):** δ 7.69-7.64 (m, 2 H), 7.55 (s, 1 H), 7.31-7.29 (m, 1 H), 7.12-7.10 (m, 2 H), 5.64-5.62 (m, 1 H), 3.90 (s, 3 H), 3.43-3.40 (m, 1 H), 2.08-2.06 (m, 2 H), 1.84-1.74 (m, 2 H), 1.54-1.51 (m, 4 H), 1.40 (d, *J* = 7.2 Hz, 3 H).

**<sup>13</sup>C NMR (150 MHz, CDCl<sub>3</sub>):** δ 157.3, 141.4, 141.3, 133.2, 129.2, 129.1, 127.1, 126.6, 125.4, 120.9, 118.6, 105.7, 55.4, 46.5, 27.2, 25.5, 23.2, 22.8, 19.7.

**IR (neat, cm<sup>-1</sup>):** 2987, 2838, 2367, 1720, 1612, 1459, 1275, 1176, 1023, 918, 867, 752.

**HRMS (ESI):** [M+H]<sup>+</sup> calcd for C<sub>19</sub>H<sub>23</sub>O 267.1743, found: 267.1743.

#### (4-(Cyclopent-1-en-1-ylmethyl)phenyl)(methyl)sulfane (**3ai**)

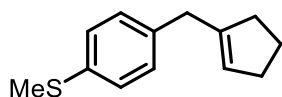

This compound was prepared according to General procedure C from the reaction of **1a** (30.8 mg, 0.2 mmol) and **2b** (64.8 mg, 0.3 mmol). It was purified by flash chromatography on

silica gel (PE/EA = 100/1). 24.5 mg, 60% yield. colorless oil.

**<sup>1</sup>H NMR (400 MHz, CDCl<sub>3</sub>):** δ 7.21-7.18 (m, 2 H), 7.12-7.09 (m, 2 H), 5.33 (s, 1 H),

3.34 (s, 2 H), 2.47 (s, 3 H), 2.33-2.28 (m, 2 H), 2.21-2.26 (m, 2 H), 1.89-1.81 (m, 2 H).

**<sup>13</sup>C NMR (100 MHz, CDCl<sub>3</sub>):** δ 143.8, 137.5, 135.4, 129.5, 127.1, 125.6, 37.5, 34.9, 32.6, 23.7, 16.5.

**IR (neat, cm<sup>-1</sup>):** 2958, 2922, 2846, 1638, 1493, 1437, 1403, 1198, 1092, 1038, 969, 798

**HRMS (ESI):** [M+H]<sup>+</sup> calcd for C<sub>13</sub>H<sub>17</sub>S 205.1045, found: 205.1052.

**(E)-(4-(cyclooct-1-en-1-ylmethyl)phenyl)(methyl)sulfane (3aj)**

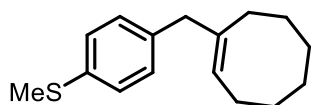

This compound was prepared according to General procedure C from the reaction of **1a** (30.8 mg, 0.2 mmol) and **2c** (77.4 mg, 0.3 mmol). It was purified by flash chromatography on silica gel (PE/EA = 100/1). 21.3 mg, 43% yield. colorless oil.

**<sup>1</sup>H NMR (600 MHz, CDCl<sub>3</sub>):** δ 7.20-7.18 (m, 2 H), 7.12-7.10 (m, 2 H), 5.36 (t, *J* = 8.4 Hz, 1 H), 3.25 (s, 2 H), 2.47 (s, 3 H), 2.11-2.07 (m, 4 H), 1.48-1.39 (m, 8 H).

**<sup>13</sup>C NMR (150 MHz, CDCl<sub>3</sub>):** δ 140.2, 137.8, 135.4, 129.9, 129.9, 127.1, 126.1, 43.6, 30.2, 28.7, 28.6, 26.6, 26.5, 26.4, 16.5.

**IR (neat, cm<sup>-1</sup>):** 3453, 2923, 2854, 1637, 1464, 1268, 1096, 917, 809, 755.

**HRMS (ESI):** [M+H]<sup>+</sup> calcd for C<sub>16</sub>H<sub>23</sub>S 247.1515, found: 247.1495.

**(4-((4,4-Dimethylcyclohex-1-en-1-yl)methyl)phenyl)(methyl)sulfane (3ak)**

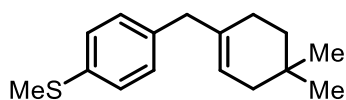

This compound was prepared according to General procedure C from the reaction of **1a** (30.8 mg, 0.2 mmol) and **2d** (77.5 mg, 0.3 mmol). It was purified by flash chromatography on silica gel (PE/EA = 100/1). 38.4 mg, 78% yield. colorless oil.

**<sup>1</sup>H NMR (400 MHz, CDCl<sub>3</sub>):** δ 7.20-7.18 (m, 2 H), 7.10-7.08 (m, 2 H), 5.39 (s, 1 H), 3.21 (s, 2 H), 2.47 (s, 3 H), 1.85-1.80 (m, 4 H), 1.31 (t, *J* = 6.0 Hz, 2 H), 0.87 (s, 6 H).

**<sup>13</sup>C NMR (100 MHz, CDCl<sub>3</sub>):** δ 137.8, 135.8, 135.4, 129.5, 127.0, 122.2, 43.9, 39.5, 35.8, 28.6, 28.3, 26.0, 16.4.

**IR (neat, cm<sup>-1</sup>):** 3040, 3019, 2950, 2922, 2868, 2834, 1701, 1654, 1403, 1364, 1220, 1154, 967, 893.

**HRMS (ESI):** [M+H]<sup>+</sup> calcd for C<sub>16</sub>H<sub>23</sub>S 247.1515, found: 247.1510.

**Methyl(4-((1,2,3,6-tetrahydro-[1,1'-biphenyl]-4-yl)methyl)phenyl)sulfane (3al)**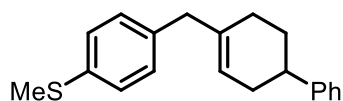

This compound was prepared according to General procedure C from the reaction of **1a** (30.8 mg, 0.2 mmol) and **2e** (91.8 mg, 0.3 mmol). It was purified by flash chromatography on silica gel (PE/EA = 100/1). 48.3 mg, 82% yield. white solid, mp.: 57-58 °C.

**<sup>1</sup>H NMR (600 MHz, CDCl<sub>3</sub>):** δ 7.33-7.27 (m, 2 H), 7.21-7.12 (m, 6 H), 5.54 (s, 1 H), 3.26 (s, 2 H), 2.76-2.71 (m, 1 H), 2.47 (s, 3 H), 2.33-2.29 (m, 1 H), 2.20-2.14 (m, 1 H), 2.10-1.89 (m, 3 H), 1.76-1.69 (m, 1 H).

**<sup>13</sup>C NMR (150 MHz, CDCl<sub>3</sub>):** δ 147.3, 137.5, 137.3, 135.6, 129.6, 128.5, 127.2, 127.0, 126.1, 122.8, 43.9, 40.3, 33.8, 30.2, 28.9, 16.5.

**IR (neat, cm<sup>-1</sup>):** 2918, 2836, 2344, 1638, 1493, 1437, 1247, 1211, 798, 757.

**HRMS (ESI):** [M+H]<sup>+</sup> calcd for C<sub>20</sub>H<sub>23</sub>S 295.1515, found: 295.1503.

**(4-((4-(Tert-butyl)cyclohex-1-en-1-yl)methyl)phenyl)(methyl)sulfane (3am)**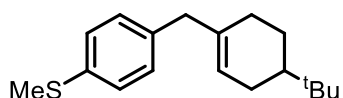

This compound was prepared according to General procedure C from the reaction of **1a** (30.8 mg, 0.2 mmol) and **2f** (85.8 mg, 0.3 mmol). It was purified by flash chromatography on silica gel (PE/EA = 100/1). 49.8 mg, 91% yield. colorless oil.

**<sup>1</sup>H NMR (600 MHz, CDCl<sub>3</sub>):** δ 7.20-7.18 (m, 2 H), 7.10-7.08 (m, 2 H), 5.45 (s, 1 H), 3.20 (s, 2 H), 2.47 (s, 3 H), 2.06-2.01 (m, 1 H), 1.91-1.89 (m, 2 H), 1.82-1.75 (m, 2 H), 1.26-1.10 (m, 2 H), 0.85 (s, 9 H).

**<sup>13</sup>C NMR (150 MHz, CDCl<sub>3</sub>):** δ 137.8, 137.1, 135.4, 129.6, 127.1, 123.4, 44.2, 43.7, 32.3, 29.6, 27.4, 27.1, 24.4, 16.5.

**IR (neat, cm<sup>-1</sup>):** 3081, 3019, 2959, 2367, 1638, 1493, 1437, 1403, 1366, 1247, 1232, 1094, 1018, 987, 913, 799.

**GC-MS (EI) m/z (rel intensity, ion):** 274.14 (100.00, M<sup>+</sup>).

**Ethyl 4-(4-(methylthio)benzyl)cyclohex-3-ene-1-carboxylate (3an)**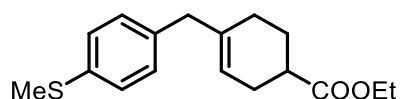

This compound was prepared according to General procedure C from the reaction of **1a** (30.8 mg, 0.2



mmol) and **2g** (90.6 mg, 0.3 mmol). It was purified by flash chromatography on silica gel (PE/EA = 10/1). 45.3 mg, 78% yield. colorless oil.

**<sup>1</sup>H NMR (400 MHz, CDCl<sub>3</sub>):** δ 7.20-7.17 (m, 2 H), 7.09-7.06 (m, 2 H), 5.45 (s, 1 H), 4.12 (q, *J* = 7.2 Hz, 2 H), 3.21 (s, 2 H), 2.51-2.44 (m, 4 H), 2.29-2.25 (m, 2 H), 1.98-1.91 (m, 3 H), 1.70-1.61 (m, 1 H), 1.24 (t, *J* = 7.2 Hz, 3 H).

**<sup>13</sup>C NMR (100 MHz, CDCl<sub>3</sub>):** δ 176.0, 137.1, 136.9, 135.6, 129.5, 127.0, 121.3, 60.3, 43.7, 39.4, 27.8, 27.4, 25.5, 16.3, 14.3.

**IR (neat, cm<sup>-1</sup>):** 3017, 2982, 2922, 2840, 2369, 1897, 1731, 1638, 1493, 1438, 1375, 1226, 1176, 1094, 971, 807.

**HRMS (ESI):** [M+H]<sup>+</sup> calcd for C<sub>17</sub>H<sub>23</sub>O<sub>2</sub>S 291.1413, found 291.1412.

**8-(4-(Methylthio)benzyl)-1,4-dioxaspiro[4.5]dec-7-ene (3ao)**

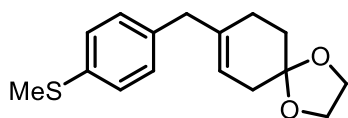

This compound was prepared according to General procedure C from the reaction of **1a** (30.8 mg, 0.2 mmol) and **2h** (86.4 mg, 0.3 mmol). It was purified by flash

chromatography on silica gel (PE/EA = 30/1). 33.2 mg, 60% yield. colorless oil.

**<sup>1</sup>H NMR (600 MHz, CDCl<sub>3</sub>):** δ 7.20-7.18 (m, 2 H), 7.11-7.09 (m, 2 H), 5.34 (s, 1 H), 3.98-3.95 (m, 4 H), 3.25 (s, 2 H), 2.47 (s, 3 H), 2.28 (s, 2 H), 2.13-2.10 (m, 2 H), 1.72 (t, *J* = 6.6 Hz, 2 H).

**<sup>13</sup>C NMR (150 MHz, CDCl<sub>3</sub>):** δ 137.1, 136.9, 135.7, 129.6, 127.1, 120.4, 108.2, 64.5, 43.1, 35.9, 31.3, 27.4, 16.4.

**IR (neat, cm<sup>-1</sup>):** 3075, 3019, 2954, 2920, 2838, 1726, 1638, 1492, 1433, 1377, 1359, 1340, 1115, 1060, 1012, 948, 840.

**HRMS (ESI):** [M+Na]<sup>+</sup> calcd for C<sub>16</sub>H<sub>20</sub>NaO<sub>2</sub>S 299.1076, found 299.1077.

**(4-((3-Ethylcyclohex-1-en-1-yl)methyl)phenyl)(methyl)sulfane (3ap)**

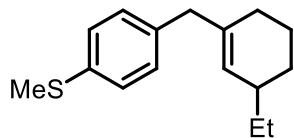

This compound was prepared according to General procedure C from the reaction of **1a** (30.8 mg, 0.2 mmol) and **2i** (77.4 mg, 0.3 mmol). It was purified by flash chromatography on

silica gel (PE/EA = 100/1). 30.5 mg, 62% yield. colorless oil.

**<sup>1</sup>H NMR (400 MHz, CDCl<sub>3</sub>):** δ 7.20-7.17 (m, 2 H), 7.11-7.08 (m, 2 H), 5.39 (s, 1 H),

3.20 (s, 2 H), 2.47 (s, 3 H), 1.98-1.97 (m, 1 H), 1.82-1.65 (m, 4 H), 1.47-1.07 (m, 4 H), 0.91 (t,  $J = 7.6$  Hz, 3 H).

**$^{13}\text{C}$  NMR (100 MHz,  $\text{CDCl}_3$ ):**  $\delta$  137.8, 136.9, 135.4, 129.5, 128.4, 127.1, 44.3, 37.3, 29.4, 28.6, 28.3, 22.0, 16.4, 11.6.

**IR (neat,  $\text{cm}^{-1}$ ):** 3463, 2961, 2924, 2859, 2876, 1638, 1493, 1418, 1144, 1094, 969, 887, 785.

**HRMS (ESI):**  $[\text{M}+\text{H}]^+$  calcd for  $\text{C}_{16}\text{H}_{23}\text{S}$  247.1515, found 247.1513.

**Tert-butyldimethyl((3-(4-(methylthio)benzyl)cyclohex-2-en-1-yl)oxy)silane (3aq)**

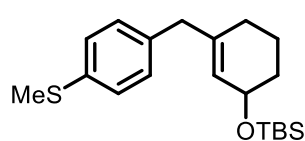

This compound was prepared according to General procedure C from the reaction of **1a** (30.8 mg, 0.2 mmol) and **2j** (108.0 mg, 0.3 mmol). It was purified by flash chromatography on

silica gel (PE/EA = 100/1). 64.8 mg, 93% yield. colorless oil.

**$^1\text{H}$  NMR (600 MHz,  $\text{CDCl}_3$ ):**  $\delta$  7.22-7.20 (m, 2 H), 7.13-7.11 (m, 2 H), 5.48 (s, 1 H), 4.29 (s, 1 H), 3.30-3.20 (m, 2 H), 2.49 (s, 3 H), 1.91-1.74 (m, 4 H), 1.55-1.46 (m, 2 H), 0.93 (s, 9 H), 0.11 (s, 3 H), 0.10 (s, 3 H).

**$^{13}\text{C}$  NMR (150 MHz,  $\text{CDCl}_3$ ):**  $\delta$  139.6, 137.0, 135.7, 129.6, 127.5, 127.1, 67.4, 43.8, 32.5, 27.9, 26.1, 20.0, 18.5, 16.4, -4.3, -4.4.

**IR (neat,  $\text{cm}^{-1}$ ):** 2929.5, 2858.8, 1507.7, 1264.9, 916.9, 835.6, 755.4.

**HRMS (ESI):**  $[\text{M}+\text{H}]^+$  calcd for  $\text{C}_{20}\text{H}_{33}\text{OSSi}$  349.2016, found: 349.2039.

**(4-(Bicyclo[2.2.1]hept-2-en-2-ylmethyl)phenyl)(methyl)sulfane (3ar)**

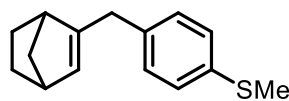

This compound was prepared according to General procedure C from the reaction of **1a** (30.8 mg, 0.2 mmol) and **2k** (72.6

mg, 0.3 mmol). It was purified by flash chromatography on silica gel (PE/EA = 100/1). 23.5 mg, 51% yield. colorless oil.

**$^1\text{H}$  NMR (600 MHz,  $\text{CDCl}_3$ ):**  $\delta$  7.20-7.18 (m, 2 H), 7.10-7.09 (m, 2 H), 5.50 (s, 1 H), 3.37-3.30 (m, 2 H), 2.78 (m, 1 H), 2.63 (s, 1 H), 2.47 (s, 3 H), 1.64-1.54 (m, 2 H), 1.38-1.36 (m, 1 H), 1.08-1.03 (m, 2 H), 0.90-0.88 (m, 1 H).

**$^{13}\text{C}$  NMR (150 MHz,  $\text{CDCl}_3$ ):**  $\delta$  148.7, 137.2, 135.4, 129.6, 129.6, 129.4, 127.1, 127.1, 48.7, 45.1, 42.4, 36.1, 26.9, 24.7, 16.4.

**IR (neat, cm<sup>-1</sup>):** 2920, 2829, 2365, 1493, 1437, 1372, 1236, 1126, 1094, 1017, 852, 801.

**HRMS (ESI):** [M+H]<sup>+</sup> calcd for C<sub>15</sub>H<sub>19</sub>S 231.1202, found: 231.1213.

**4-(4-(Methylthio)benzyl)-3,6-dihydro-2H-pyran (3as)**

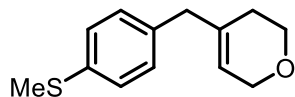

This compound was prepared according to General procedure

C from the reaction of **1a** (30.8 mg, 0.2 mmol) and **2l** (69.6 mg, 0.3 mmol). It was purified by flash chromatography on silica gel (PE/EA = 100/1). 35.2 mg, 80% yield. colorless oil.

**<sup>1</sup>H NMR (400 MHz, CDCl<sub>3</sub>):** δ 7.21-7.18 (m, 2 H), 7.11-7.08 (m, 2 H), 5.43 (tt, *J* = 2.8, 1.4 Hz, 1 H), 4.14-4.11 (m, 2 H), 3.74 (t, *J* = 5.2 Hz, 2 H), 3.26 (s, 2 H), 2.47 (s, 3 H), 2.00-1.97 (m, 2 H).

**<sup>13</sup>C NMR (150 MHz, CDCl<sub>3</sub>):** δ 136.2, 136.0, 129.7, 127.1, 121.7, 65.6, 64.5, 43.2, 28.3, 16.3.

**IR (neat, cm<sup>-1</sup>):** 3019, 2920, 2849, 2748, 2365, 2343, 1742, 1493, 1437, 1371, 1236, 1126, 1094, 1018, 852, 801.

**HRMS (ESI):** [M+H]<sup>+</sup> calcd for C<sub>13</sub>H<sub>17</sub>OS 221.0995, found: 221.0998.

**1-Benzyl-4-(4-(methylthio)benzyl)-1,2,3,6-tetrahydropyridine (3at)**

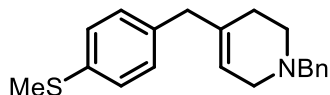

This compound was prepared according to General

procedure C from the reaction of **1a** (30.8 mg, 0.2 mmol) and **2m** (96.3 mg, 0.3 mmol). It was purified by flash chromatography on silica gel (PE/EA = 10/1). 58.7 mg, 95% yield, colorless oil.

**<sup>1</sup>H NMR (600 MHz, CDCl<sub>3</sub>):** δ 7.34-7.30 (m, 4 H), 7.29-7.23 (m, 1 H), 7.19-7.18 (m, 2 H), 7.09-7.08 (m, 2 H), 5.36-5.35 (m, 1 H), 3.57 (s, 2 H), 3.23 (s, 2 H), 2.98 (s, 2 H), 2.52 (t, *J* = 6.0 Hz, 2 H), 2.46 (s, 3 H), 2.03 (s, 2 H).

**<sup>13</sup>C NMR (150 MHz, CDCl<sub>3</sub>):** δ 138.4, 136.8, 135.9, 135.7, 129.8, 129.4, 128.3, 127.2, 127.1, 121.0, 62.8, 53.0, 50.0, 43.0, 29.0, 16.4.

**IR (neat, cm<sup>-1</sup>):** 3027, 2924, 2799, 2751, 1638, 1495, 1437, 1455, 1264, 1094, 971, 805.

**GC-MS (EI) m/z (rel intensity, ion):** 309.13 (100.00, M<sup>+</sup>).

#### 4-(4-(Methylthio)benzyl)-1-tosyl-1,2,3,6-tetrahydropyridine (3au)

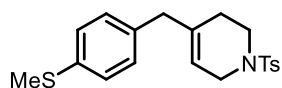

This compound was prepared according to General procedure C from the reaction of **1a** (30.8 mg, 0.2 mmol) and **2n** (115.6

mg, 0.3 mmol). It was purified by flash chromatography on silica gel (PE/EA = 10/1). 62.6 mg, 84% yield, white solid, mp.: 125-127 °C

**<sup>1</sup>H NMR (600 MHz, CDCl<sub>3</sub>):** δ 7.67-7.64 (m, 2 H), 7.32-7.29 (m, 2 H), 7.17-7.15 (m, 2 H), 7.01-6.99 (m, 2 H), 5.34 (s, 1 H), 3.57 (s, 2 H), 3.20 (s, 2 H), 3.13 (t, *J* = 6.0 Hz, 2 H), 2.46 (s, 3 H), 2.42 (s, 3 H), 2.06 (s, 2 H).

**<sup>13</sup>C NMR (150 MHz, CDCl<sub>3</sub>):** δ 143.6, 136.2, 136.1, 135.8, 133.5, 129.7, 129.5, 127.8, 127.1, 118.3, 45.0, 43.0, 42.9, 28.1, 21.6, 16.3.

**IR (neat, cm<sup>-1</sup>):** 2920, 2829, 2365, 1493, 1437, 1372, 1236, 1126, 1094, 1017, 852, 801.

**HRMS (ESI):** [M+H]<sup>+</sup> calcd for C<sub>20</sub>H<sub>24</sub>NO<sub>2</sub>S<sub>2</sub> 374.1243, found: 374.1241.

#### Tert-butyl 4-(4-(methylthio)benzyl)-3,6-dihydropyridine-1(2H)-carboxylate (3av)

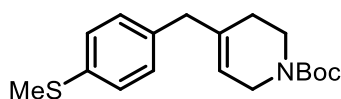

This compound was prepared according to General procedure C from the reaction of **1a** (30.8 mg, 0.2 mmol)

and **2o** (99.4 mg, 0.3 mmol). It was purified by flash chromatography on silica gel (PE/EA = 10/1). 58.7 mg, 92% yield, colorless oil.

**<sup>1</sup>H NMR (400 MHz, CDCl<sub>3</sub>):** δ 7.20-7.18 (m, 2 H), 7.10-7.07 (m, 2 H), 5.37 (s, 1 H), 3.87 (s, 2 H), 3.44 (t, *J* = 5.6 Hz, 2 H), 3.26 (s, 2 H), 2.47 (s, 3 H), 1.98 (s, 2 H), 1.45 (s, 9 H).

**<sup>13</sup>C NMR (100 MHz, CDCl<sub>3</sub>):** δ 155.1, 136.3, 136.0, 129.6, 127.0, 79.6, 63.3, 43.3, 28.6, 28.2, 16.3, 14.1.

**IR (neat, cm<sup>-1</sup>):** 3006, 2978, 2924, 2838, 1769, 1746, 1696, 1478, 1455, 1420, 1286, 1241, 1113, 1051, 988, 699.

**HRMS (ESI):** [M+H]<sup>+</sup> calcd for C<sub>18</sub>H<sub>26</sub>NO<sub>2</sub>S 320.1679, found: 320.1695.

#### 5-(2,3-Dimethylbut-2-en-1-yl)-3a,7a-dihydrobenzo[d][1,3]dioxole (3aw)

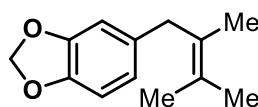

This compound was prepared according to General procedure C from the reaction of **1f** (30.8 mg, 0.2 mmol) and **2p** (65.5 mg,

0.3 mmol), but Ni(PCy<sub>3</sub>)<sub>2</sub>Cl<sub>2</sub> (13.8 mg, 0.02 mmol) was used instead of Ni(dppf)Cl<sub>2</sub>, 4,4'-Dimethyl-2,2'-bipyridyl (7.4 mg, 0.04 mmol) was used instead of dtbpy, and dppf (11 mg, 0.02mmol), ZrCl<sub>4</sub> (9.3 mg, 0.04 mmol) was used, conducted at 30 °C. It was purified by flash chromatography on silica gel (PE/EA = 100/1). 18.8 mg, 46% yield, colorless oil.

**<sup>1</sup>H NMR (600 MHz, CDCl<sub>3</sub>):** δ 6.71 (d, *J* = 7.8 Hz, 1 H), 6.63 (s, 1 H), 6.60 (d, *J* = 7.8 Hz, 1 H), 5.91 (s, 2 H), 3.30 (s, 2 H), 1.77 (s, 3 H), 1.72 (s, 3 H), 1.58 (s, 3 H).

**<sup>13</sup>C NMR (150 MHz, CDCl<sub>3</sub>):** δ 147.5, 134.9, 126.5, 125.8, 125.1, 121.2, 108.8, 108.0, 100.7, 39.7, 20.61, 20.6, 18.2.

**IR (neat, cm<sup>-1</sup>):** 3517, 3447, 3362, 2926, 2858, 1656, 1598, 1495, 800, 732.

**GC-MS (EI) m/z (rel intensity, ion):** 204.09 (100.00, M<sup>+</sup>).

**(*E*)-5-(2-propylpent-2-en-1-yl)-3a,7a-dihydrobenzo[*d*] [1,3]dioxole (3ax)**

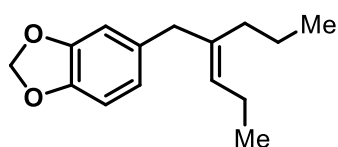

This compound was prepared according to General procedure C from the reaction of **1f** (30.8 mg, 0.2 mmol) and **2q** (73.9 mg, 0.3 mmol), but Ni(PCy<sub>3</sub>)<sub>2</sub>Cl<sub>2</sub> ( 13.8 mg,

0.02 mmol) was used instead of Ni(dppf)Cl<sub>2</sub>, 4,4'-Dimethyl-2,2'-bipyridyl ( 7.4 mg, 0.04 mmol) was used instead of dtbpy, and dppf (11 mg, 0.02 mmol), ZrCl<sub>4</sub> ( 9.3 mg, 0.04 mmol) was used, conducted at 30 °C. It was purified by flash chromatography on silica gel (PE/EA = 100/1). 24.2 mg, 52% yield. colorless oil.

**<sup>1</sup>H NMR (600 MHz, CDCl<sub>3</sub>):** δ 6.77-6.55 (m, 3 H), 5.92 (s, 2 H), 5.20 (t, *J* = 7.2 Hz, 1 H), 3.19 (s, 2 H), 2.16-1.99 (m, 2 H), 1.92-1.88 (m, 2 H), 1.38-1.32 (m, 2 H), 0.96 (t, *J* = 7.4 Hz, 3 H), 0.86 (t, *J* = 7.4 Hz, 3 H).

**<sup>13</sup>C NMR (150 MHz, CDCl<sub>3</sub>):** δ 147.6, 145.8, 138.1, 134.8, 129.4, 121.8, 109.4, 108.0, 100.8, 43.4, 31.5, 21.6, 21.3, 14.8, 14.2.

**IR (neat, cm<sup>-1</sup>):** 3461, 2984, 1487, 1268, 1041, 932, 806, 756.

**HRMS (ESI):** [M+Na]<sup>+</sup> calcd for C<sub>15</sub>H<sub>20</sub>NaO<sub>2</sub> 255.1356, found: 255.1352.

#### 2-(Cyclohex-1-en-1-ylmethyl)-N-(3-(trifluoromethyl)phenyl)aniline (**4**)

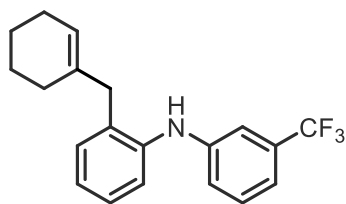

This compound was prepared according to General procedure C from the reaction of **1ak** (53.4 mg, 0.2 mmol) and **2a** (69.0 mg, 0.3 mmol). It was purified by flash chromatography on silica gel (PE/EA = 5/1). 35.7mg, 54% yield. colorless oil.

**<sup>1</sup>H NMR (600 MHz, CDCl<sub>3</sub>):**  $\delta$  7.32-7.26 (m, 2 H), 7.21-7.19 (m, 2 H), 7.10 (s, 1 H), 7.07 (d,  $J$  = 7.7 Hz, 1 H), 7.04-6.99 (m, 2 H), 5.96 (s, 1 H), 5.48-5.47 (m, 1 H), 3.28 (s, 2 H), 2.05-2.00 (m, 2 H), 1.87 (s, 2 H), 1.63-1.54 (m, 4 H).

**<sup>13</sup>C NMR (150 MHz, CDCl<sub>3</sub>):**  $\delta$  144.9, 140.7, 136.5, 131.8 (q,  $J_{C-F}$  = 30 Hz), 131.7, 130.8, 129.9, 127.4, 124.3 (q,  $J_{C-F}$  = 271 Hz), 123.4, 123.1, 120.1, 119.4, 116.3 (q,  $J_{C-F}$  = 3 Hz), 41.6, 28.5, 25.4, 22.9, 22.5.

**<sup>19</sup>F NMR (376 MHz, CDCl<sub>3</sub>):**  $\delta$  -62.8.

**IR (neat, cm<sup>-1</sup>):** 3437, 3390, 3038, 2930, 2861, 2838, 1618, 1597, 1584, 1523, 1496, 1426, 1336, 1280, 1224, 1165, 1098, 997, 924, 865, 699.

**HRMS (ESI):** [M+H]<sup>+</sup> calcd for C<sub>15</sub>H<sub>23</sub>O<sub>2</sub> 332.1621, found: 332.1619.

#### (1R,3R,5S)-1-(5-(6-(cyclohex-1-en-1-ylmethyl)naphthalen-2-yl)-2-methoxyphenyl)adamantane (**5**)

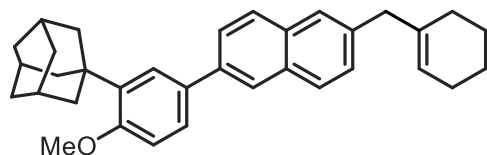

This compound was prepared according to General procedure C from the reaction of **1al** (79.6 mg, 0.2 mmol) and **2a** (69.0 mg, 0.3

mmol). It was purified by flash chromatography on silica gel (PE/EA = 100/1). 57.4 mg, 62% yield, white solid, mp.: 159-160 °C.

**<sup>1</sup>H NMR (600 MHz, CDCl<sub>3</sub>):**  $\delta$  7.97-7.93 (m, 1 H), 7.80 (t,  $J$  = 8.0 Hz, 2 H), 7.69 (dd,  $J$  = 8.6, 1.8 Hz, 1 H), 7.60 (d,  $J$  = 1.6 Hz, 1 H), 7.58 (d,  $J$  = 2.2 Hz, 1 H), 7.51 (dd,  $J$  = 8.4, 2.2 Hz, 1 H), 7.33 (dd,  $J$  = 8.4, 1.6 Hz, 1 H), 6.97 (d,  $J$  = 8.4 Hz, 1 H), 5.54-5.51 (m, 1 H), 3.88 (s, 3 H), 3.40 (s, 2 H), 2.18 (d,  $J$  = 3.0 Hz, 6 H), 2.15-2.07 (m, 3 H), 2.06-2.02 (m, 2 H), 1.91-1.88 (m, 2 H), 1.80-1.79 (m, 6 H), 1.59-1.53 (m, 4 H).

**<sup>13</sup>C NMR (150 MHz, CDCl<sub>3</sub>):**  $\delta$  158.6, 138.9, 138.4, 137.9, 137.4, 133.5, 132.5, 132.5,

128.2, 127.9, 126.9, 126.0, 125.8, 125.7, 124.9, 123.3, 112.2, 55.3, 45.0, 40.7, 37.3, 37.3, 29.3, 28.3, 25.5, 23.1, 22.6.

**IR (neat, cm<sup>-1</sup>):** 3537, 3058, 2906, 2853, 1638, 1497, 1457, 1237, 1139, 882, 807, 740, 704.

**HRMS (ESI):** [M+H]<sup>+</sup> calcd for C<sub>15</sub>H<sub>23</sub>O<sub>2</sub> 463.2995, found: 463.2987.

**(4-(((4R,4aS,6R)-4,4a-dimethyl-6-(prop-1-en-2-yl)-3,4,4a,5,6,7-hexahydronaphthalen-2-yl)methyl)phenyl)(methyl)sulfane (6)**

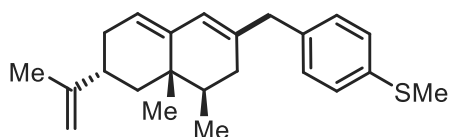

This compound was prepared according to General procedure C from the reaction of **1a** (30.8 mg, 0.2 mmol) and **2r** (105.0 mg, 0.3 mmol). It

was purified by flash chromatography on silica gel (PE/EA = 100/1). 50.1 mg, 74% yield. colorless oil.

**<sup>1</sup>H NMR (600 MHz, CDCl<sub>3</sub>):** δ 7.20-7.16 (m, 2 H), 7.12-7.07 (m, 2 H), 5.81 (d, *J* = 2.2 Hz, 1 H), 5.41-5.40 (m, 1 H), 4.74-4.73 (m, 2 H), 3.27 (s, 2 H), 2.47 (s, 3 H), 2.26-2.21 (m, 1 H), 1.99-1.94 (m, 1 H), 1.86-1.82 (m, 1 H), 1.79-1.77 (m, 1 H), 1.75 (s, 3 H), 1.72-1.69 (m, 1 H), 1.53-1.46 (m, 1 H), 1.27-1.24 (m, 1 H), 1.16 (t, *J* = 12.7 Hz, 1 H), 0.85 (s, 3 H), 0.83 (d, *J* = 6.8 Hz, 3 H).

**<sup>13</sup>C NMR (150 MHz, CDCl<sub>3</sub>):** δ 150.5, 142.5, 137.2, 136.6, 135.6, 129.5, 127.1, 125.6, 122.0, 108.7, 43.5, 40.2, 39.2, 37.5, 36.0, 35.2, 31.3, 20.8, 17.6, 16.3, 14.8.

**IR (neat, cm<sup>-1</sup>):** 3435, 2965, 2920, 2831, 1646, 1493, 1434, 1375, 1284, 1094, 1018, 967, 885, 801.

**HRMS (ESI):** [M+H]<sup>+</sup> calcd for C<sub>15</sub>H<sub>23</sub>O<sub>2</sub> 339.2141, found: 339.2143.

## 5. Mechanistic Investigation

### 5.1 The effect of oxalate group on the coupling reaction

#### 5.1.1 Preparation of benzylic oxalates 7

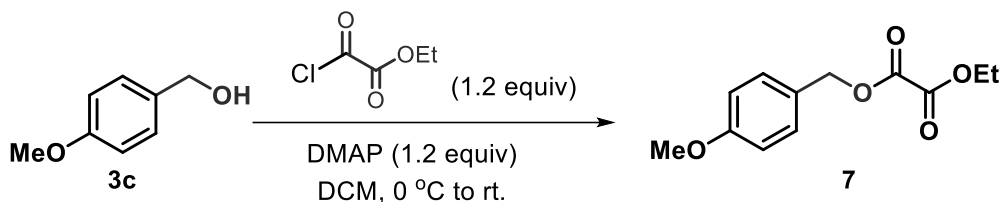

**General procedure.**<sup>2</sup> To a solution of DMAP (0.36 g, 3.0 mmol, 1.2 equiv.) in CH<sub>2</sub>Cl<sub>2</sub> (10 mL) was dropwise added ethyl oxalyl monochloride (0.33 mL, 3.0 mmol, 1.2 equiv.) at 0 °C. The reaction mixture was stirred at room temperature for 5 min before slow addition of a solution of (4-methoxyphenyl)methanol (0.35 g, 2.5 mmol) in CH<sub>2</sub>Cl<sub>2</sub> (5 mL). The reaction mixture was stirred for 10 min and then quenched with water (10 mL) and extracted with CH<sub>2</sub>Cl<sub>2</sub> twice. The combined organic layers were washed with brine, dried over anhydrous Na<sub>2</sub>SO<sub>4</sub>, filtered, and concentrated in vacuum. The crude residue was purified by flash chromatography on silica gel to afford benzylic oxalates.

#### Ethyl (4-methoxybenzyl) oxalate (7)

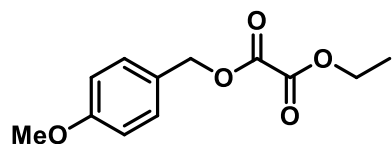

7 is a known compound. <sup>1</sup>H NMR and <sup>13</sup>C NMR data are consistent with those reported in ref. 2.

**<sup>1</sup>H NMR (400 MHz, CDCl<sub>3</sub>):** δ 7.35 (d, *J* = 8.4 Hz, 2 H), 6.89 (m, d, *J* = 8.4 Hz, 2 H), 5.25 (s, 2 H), 4.32 (q, *J* = 7.2 Hz, 2 H), 3.81 (s, 3 H), 1.36 (t, *J* = 7.2 Hz, 3 H).

**<sup>13</sup>C NMR (100 MHz, CDCl<sub>3</sub>):** δ 160.3, 158.0, 157.9, 130.9, 126.5, 114.2, 68.6, 63.3, 55.4, 14.0.



### 5.1.2 Effect of the oxalate group

**Scheme S2. Effect of the oxalate group**

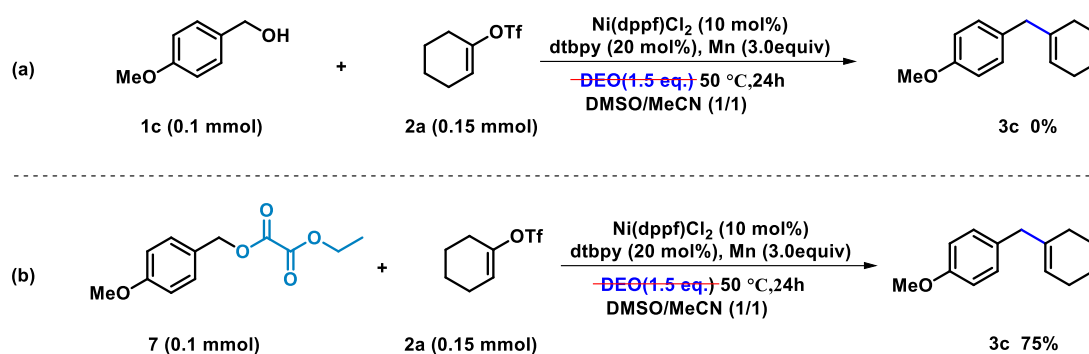

These reactions were conducted according to the General procedure C. DEO was not used in the reactions. **7** was used instead of alcohol **1c** in the reaction in Scheme S2b. The yields were isolated yields.

### 5.2 Radical trapping experiments

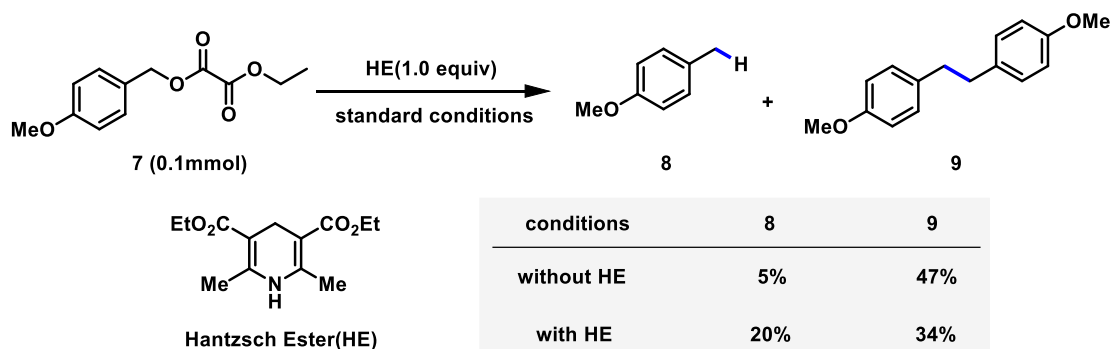

**General procedure for reaction without HE:** The reaction was conducted in an argon-filled glove box. To a reaction tube equipped with a magnetic stir bar was added Ni(dppf)Cl<sub>2</sub> (6.8 mg, 0.01 mmol), dtbpy (5.4 mg, 0.02 mmol), Mn (16.5 mg, 0.3 mmol), **7** (23.8 mg, 0.1 mmol) and DMSO/ MeCN (1:1, 0.33 mL, 0.3 M). It was then sealed and removed from the glove box. The reaction mixture was stirred at 50 °C for 24 h. The reaction was quenched with water (10 mL), and the mixture was extracted with ethyl acetate (3 × 10 mL). The combined organic layers were washed with water, brine, dried over anhydrous Na<sub>2</sub>SO<sub>4</sub>. A 0.2 mL of solution was collected and diluted with ethyl acetate (1 mL). The yields of **8** and **9** were determined by GC Analysis using dodecane as internal standard.

**General procedure for reaction of 7 in the presence of HE:** The reaction was conducted in an argon-filled glove box. To a reaction tube equipped with a magnetic stir bar was added Ni(dppf)Cl<sub>2</sub> (6.8 mg, 0.01 mmol), dtbpy (5.4 mg, 0.02 mmol), Mn (16.5 mg, 0.3 mmol), hantzsch ester (25.3 mg, 0.1 mmol), **7** (23.8 mg, 0.1 mmol) and DMSO/ MeCN (1:1, 0.33 mL, 0.3 M). It was then sealed and removed from the glove box. The reaction mixture was stirred at 50 °C for 24 h. The reaction was quenched with water (10 mL), and the mixture was extracted with ethyl acetate (3 × 10 mL). The combined organic layers were washed with water, brine, dried over anhydrous Na<sub>2</sub>SO<sub>4</sub>. A 0.2 mL of solution was collected and diluted with ethyl acetate (1 mL). The yields of **8** and **9** were determined by GC Analysis using dodecane as internal standard.

#### 4-Methylanisole (**8**)

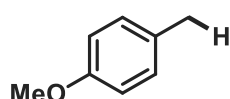

**8** is a known compound. <sup>1</sup>H NMR and <sup>13</sup>C NMR data are consistent with those reported in ref. 2.

**<sup>1</sup>H NMR (600 MHz, CDCl<sub>3</sub>):** δ 7.08 (d, *J* = 8.5 Hz, 2 H), 6.80 (d, *J* = 8.5 Hz, 2 H), 3.77 (s, 3 H), 2.28 (s, 3 H).

**<sup>13</sup>C NMR (150 MHz, CDCl<sub>3</sub>):** δ 157.6, 130.0, 130.0, 113.8, 55.4, 20.6.

#### 1,2-Bis(4-methoxyphenyl)ethane (**9**)

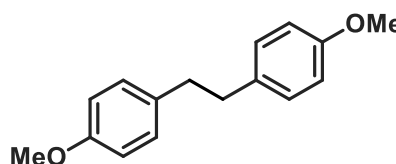

**9** is a known compound. <sup>1</sup>H NMR and <sup>13</sup>C NMR data are consistent with those reported in ref. 2.

**<sup>1</sup>H NMR (600 MHz, CDCl<sub>3</sub>):** δ 7.00 (d, *J* = 8.6 Hz, 4 H), 6.74 (d, *J* = 8.6 Hz, 4 H), 3.71 (s, 6 H), 2.75 (s, 4 H).

**<sup>13</sup>C NMR (150 MHz, CDCl<sub>3</sub>):** δ 157.9, 134.1, 129.5, 113.8, 55.4, 37.4.

### 5.3 Radical clock experiments

**General procedure.** The procedure was conducted in an argon-filled glove box. To a reaction tube equipped with a magnetic stir bar was charged with Ni(dppf)Cl<sub>2</sub> (6.8 mg, 0.01 mmol), dtbpy (5.4 mg, 0.02 mmol), and Mn (16.5 mg, 0.3 mmol). The solution of

**7** (22.4 mg, 0.1 mmol) and **10** (14.4 mg, 0.1 mmol) in DMSO/MeCN (1:1, 0.33 mL, 0.3 M) was then added. It was then removed from the glove box, and the reaction mixture was stirred at 50 °C for 24 h. The reaction was quenched with water (10 mL), and the mixture was extracted with ethyl acetate (3 × 10 mL). The combined organic layers were washed with water, brine, dried over anhydrous Na<sub>2</sub>SO<sub>4</sub>. The yield of **11** was determined by <sup>1</sup>H NMR analysis with CH<sub>2</sub>Br<sub>2</sub> as an internal standard.

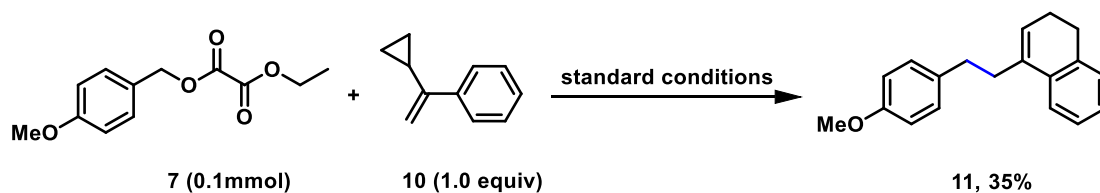

#### 4-(4-Methoxyphenethyl)-1,2-dihydronaphthalene (**11**)

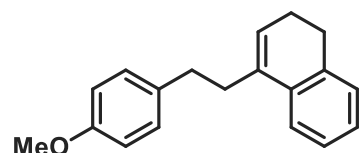

**11** is a known compound. <sup>1</sup>H NMR and <sup>13</sup>C NMR data are consistent with those reported in ref. 2.

**<sup>1</sup>H NMR (600 MHz, CDCl<sub>3</sub>):** δ 7.31 (d, *J* = 7.6 Hz, 1 H), 7.23-7.20 (m, 1 H), 7.16-7.15 (m, 2 H), 7.12 (d, *J* = 8.4 Hz), 6.84 (d, *J* = 8.6 Hz, 2 H), 5.83 (t, *J* = 4.6 Hz, 1 H), 3.80 (s, 3 H), 2.80-2.77 (m, 2 H), 2.74-2.69 (m, 4 H), 2.24-2.21 (m, 2 H).

**<sup>13</sup>C NMR (150 MHz, CDCl<sub>3</sub>):** δ 157.9, 137.0, 136.0, 134.9, 134.5, 129.5, 127.8, 126.7, 126.5, 125.4, 122.7, 113.8, 55.4, 35.2, 34.1, 28.6, 23.2.

## 6. References

- (1) Armarego, W. L. F.; Chai, C. L. L. *Purification of laboratory chemicals*, 5th ed., Butterworth-Heinemann, **2003**.
- (2) Guo, P.; Wang, K.; Jin, W.-J.; Xie, H.; Qi, L.; Liu, X.-Y.; Shu, X.-Z. Dynamic Kinetic Cross-Electrophile Arylation of Benzyl Alcohols by Nickel Catalysis. *J. Am. Chem. Soc.* **2021**, *143*, 513-523.
- (3) Lipshutz, B. H.; Hageman, M.; Fennewald, J. C.; Linstadt, R.; Slack, E.; Voigtritter, K. Selective oxidations of activated alcohols in water at room temperature. *Chem. Commun.* **2014**, *50*, 11378-11381.
- (4) Kawaratani, Y.; Harada, T.; Hirata, Y.; Nagaoka, Y.; Tanimura, S.; Shibano, M.; Taniguchi, M.; Yasuda, M.; Baba, K.; Uesato, S. New microtubule polymerization inhibitors comprising a nitrooxymethylphenyl group. *Bioorg. Med. Chem.* **2011**, *13*, 3995-4003.
- (5) Kim, I. H.; Morisseau, C.; Watanabe, T.; Hammock, B. D. Design, synthesis, and biological activity of 1, 3-disubstituted ureas as potent inhibitors of the soluble epoxide hydrolase of increased water solubility. *J. Med. Chem.* **2004**, *47*, 2110-2122.
- (6) Sharma, A.; So, S.; Kim, J.-H.; MacMillan, S. N.; Baik, M.-H.; Trovitch, R. J. An aryl diamine cobalt(I) catalyst for carbonylhydrosilylation. *Chem. Commun.* **2022**, *58*, 10793–10796.
- (7) Joncour, A.; Décor, A.; Liu, J.-M.; Tran Huu Dau, M.-E.; Baudoin, O. Asymmetric synthesis of antimicrotubule biaryl hybrids of allocolchicine and steganacin. *Chem.-Eur. J.* **2007**, *13*, 5450–5465.
- (8) Battilocchio, C.; Hawkins, J. M.; Ley, S. V. A Mild and Efficient Flow Procedure for the Transfer Hydrogenation of Ketones and Aldehydes using Hydrous Zirconia. *Org. Lett.* **2013**, *15*, 2278–2281.
- (9) Trose, M.; Lazreg, F.; Chang, T.; Nahra, F.; Cordes, D. B.; Slawin, A. M. Z.; Cazin, C. S. J. Neutral Dinuclear Copper(I)-NHC Complexes: Synthesis and Application in the Hydrosilylation of Ketones. *ACS Catal.* **2017**, *7*, 238–242.

- (10) Duan, J.; Du, Y.-F.; Pang, X.; Shu, X.-Z. Ni-catalyzed cross-electrophile coupling between vinyl/aryl and alkyl sulfonates: synthesis of cycloalkenes and modification of peptides. *Chem. Sci.* **2019**, *10*, 8706-8712.
- (11) Crisp, G. T.; Scott, W. J. A Convenient Synthesis of Vinyl Triflates from Enones. *Synthesis* **1985**, *3*, 335-337.
- (12) Tian, Z.-X.; Qiao, J.-B.; Xu, G.-L.; Pang, X.; Qi, L.; Ma, W.-Y.; Zhao, Z.-Z.; Duan, J.; Du, Y.-F.; Su, P.; Liu, X.-Y.; Shu, X.-Z. Highly Enantioselective Cross-Electrophile Aryl-Alkenylation of Unactivated Alkenes. *J. Am. Chem. Soc.* **2019**, *141*, 7637-7643.
- (13) Qiao, J.-B.; Zhao, Z.-Z.; Zhang, Y.-Q.; Yin, K.; Tian, Z.-X.; Shu, X.-Z. Allylboronates from Vinyl Triflates and  $\alpha$ -Chloroboronates by Reductive Nickel Catalysis. *Org. Lett.* **2020**, *22*, 5085-5089.
- (14) Su, N.; Deng, T.; Wink, D. J.; Driver, D. J. Achieving Site Selectivity in Metal-Catalyzed Electron-Rich Carbene Transfer Reactions from N-Tosylhydrazones. *Org. Lett.* **2017**, *19*, 15, 3990-3993.
- (15) Lou, T. S.-B.; Bagley, S. W.; Willis, M. C. Cyclic alkenylsulfonyl fluorides: palladium-catalyzed synthesis and functionalization of compact multifunctional reagents. *Angew. Chem. Int. Ed.* **2019**, *58*, 18859-18863.
- (16) Ma, W.-Y.; Han, G.-Y.; Kang, S.; Pang, X.; Liu, X.-Y.; Shu, X.-Z. Cobalt-Catalyzed Enantiospecific Dynamic Kinetic Cross-Electrophile Vinylation of Allylic Alcohols with Vinyl Triflates. *J. Am. Chem. Soc.* **2021**, *143*, 39, 15930-15935.
- (17) Ueda, T.; Konishi, H.; Manabe, K. Trichlorophenyl Formate: Highly Reactive and Easily Accessible Crystalline CO Surrogate for Palladium-Catalyzed Carbonylation of Aryl/Alkenyl Halides and Triflates. *Org. Lett.* **2012**, *14*, 5370-5373.
- (18) Ganiu, M. O.; Cleveland, A. H.; Paul, K. L.; Kartika, D. Triphosgene and DMAP as Mild Reagents for Chemoselective Dehydration of Tertiary Alcohols. *Org. Lett.* **2019**, *21*, 5611-5615.
- (19) Lee, D. -H.; Kwon, K. -H.; Yi, C. S. Selective Catalytic C-H Alkylation of Alkenes with Alcohols. *Science* **2011**, *333*, 1613.

(20) Chen, Y.; Wang, X.; He, X.; An, Q.; Zuo, Z. Photocatalytic dehydroxymethylative arylation by synergistic cerium and nickel catalysis. *J. Am. Chem. Soc.* **2021**, *143*, 4896-4902.

## 7. Copies of NMR Spectra

1ai,  $^1\text{H}$  NMR (600 MHz,  $\text{CDCl}_3$ );  $^{13}\text{C}$  NMR (150 MHz,  $\text{CDCl}_3$ )

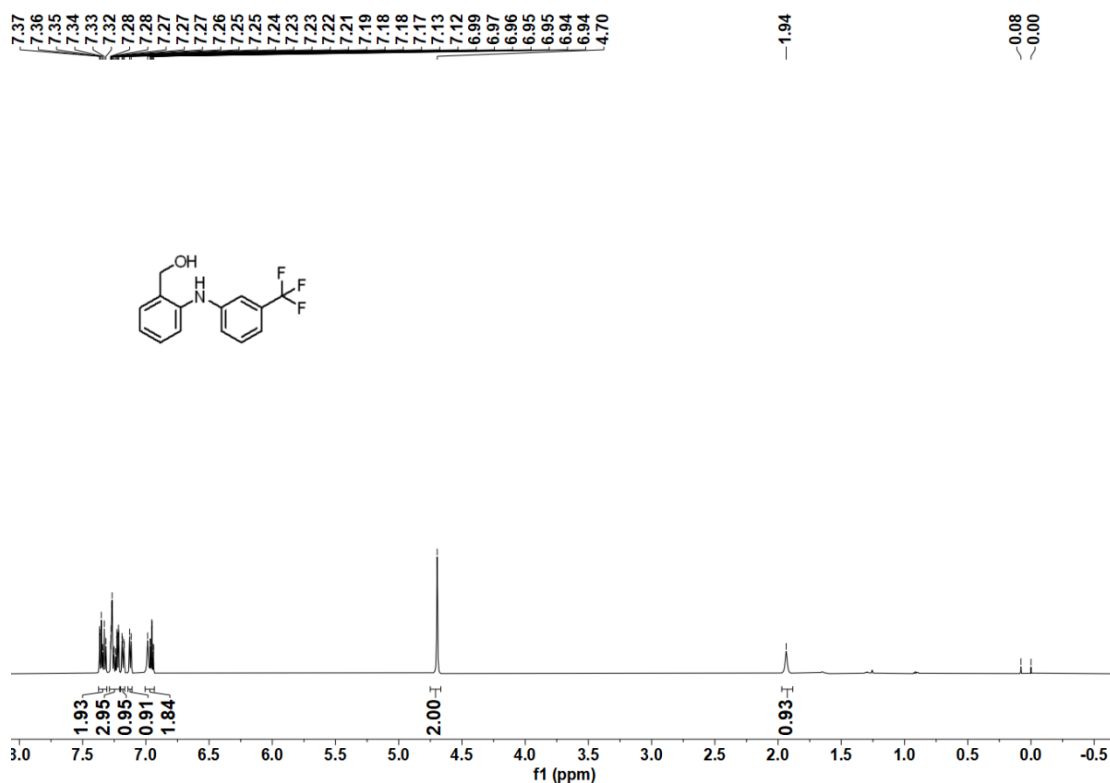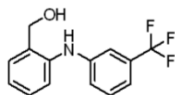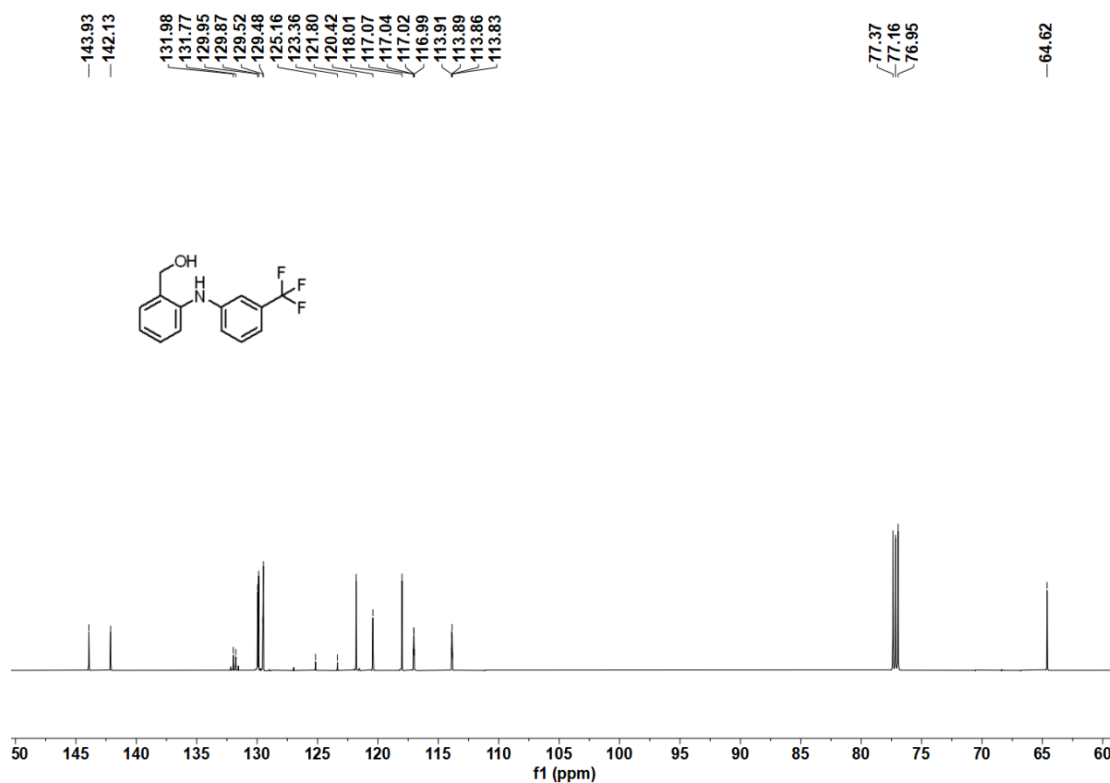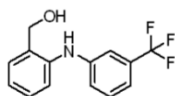

**1ai,  $^{19}\text{F}$  NMR (600 MHz,  $\text{CDCl}_3$ )**

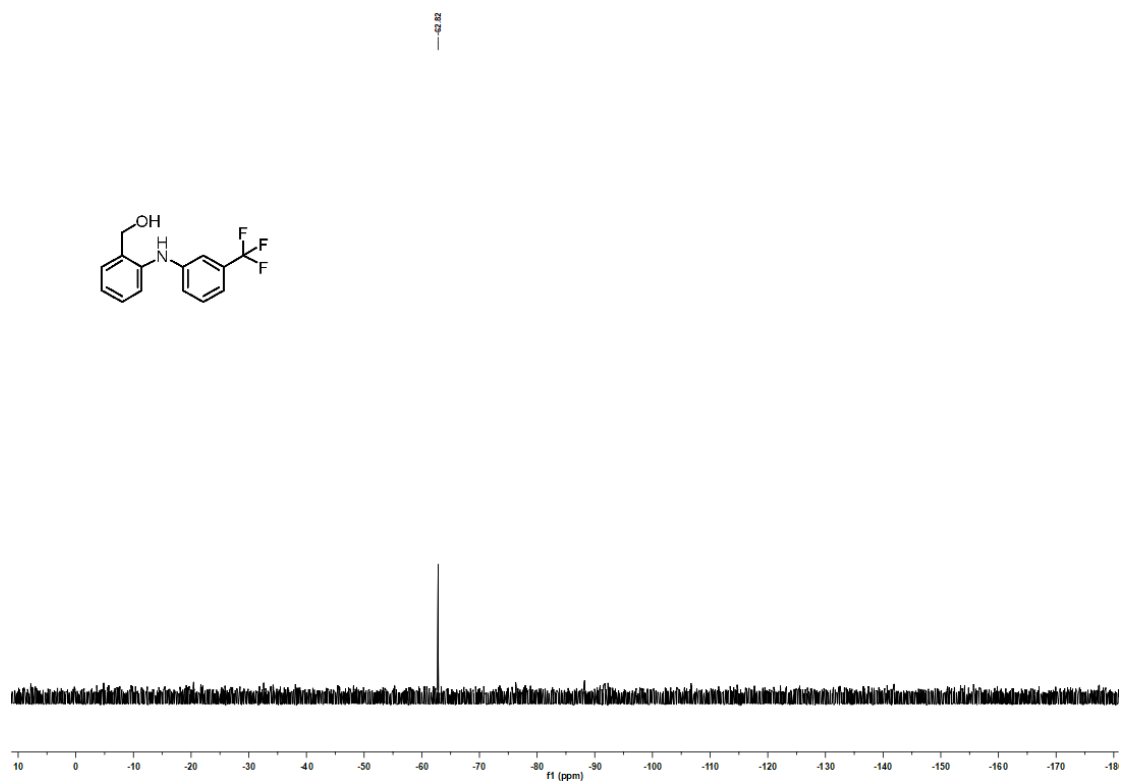



Chemical structure of 1-(4-(adamantan-1-ylmethoxy)phenyl)-4-(hydroxymethyl)naphthalene is shown above the spectrum.

<sup>1</sup>H NMR spectrum (CDCl<sub>3</sub>) showing peaks from 0.00 to 7.97 ppm. Integration values are provided below the peaks: 0.00, 1.01, 2.06, 0.98, 1.03, 1.02, 1.03, 1.03, 1.03.

Peak list (ppm): 7.97, 7.97, 7.88, 7.87, 7.87, 7.87, 7.85, 7.80, 7.80, 7.74, 7.74, 7.73, 7.72, 7.59, 7.59, 7.53, 7.53, 7.52, 7.51, 7.49, 7.49, 7.47, 7.47, 7.25, 6.99, 6.97, 4.85, 3.89, 2.19, 2.18, 2.11, 2.10, 2.10, 2.09, 1.81, 1.80, 1.80, 1.79, 0.00.

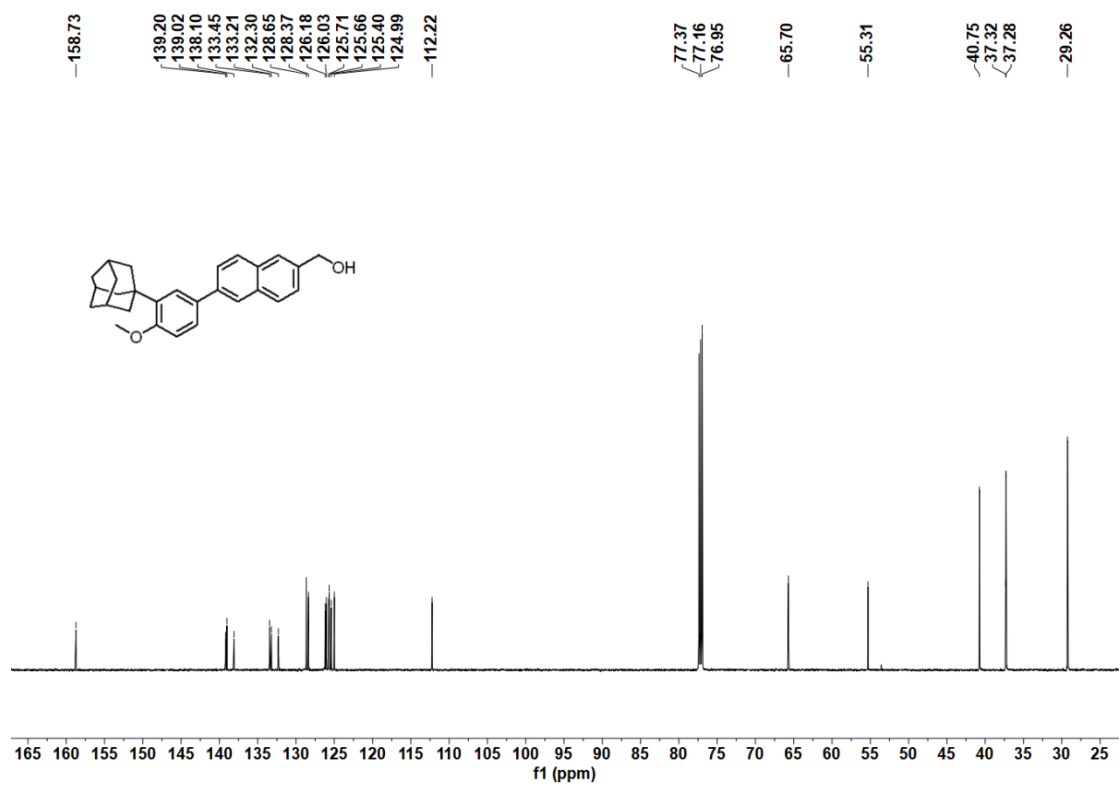

**3a,  $^1\text{H}$  NMR (600 MHz,  $\text{CDCl}_3$ );  $^{13}\text{C}$  NMR (150 MHz,  $\text{CDCl}_3$ )**

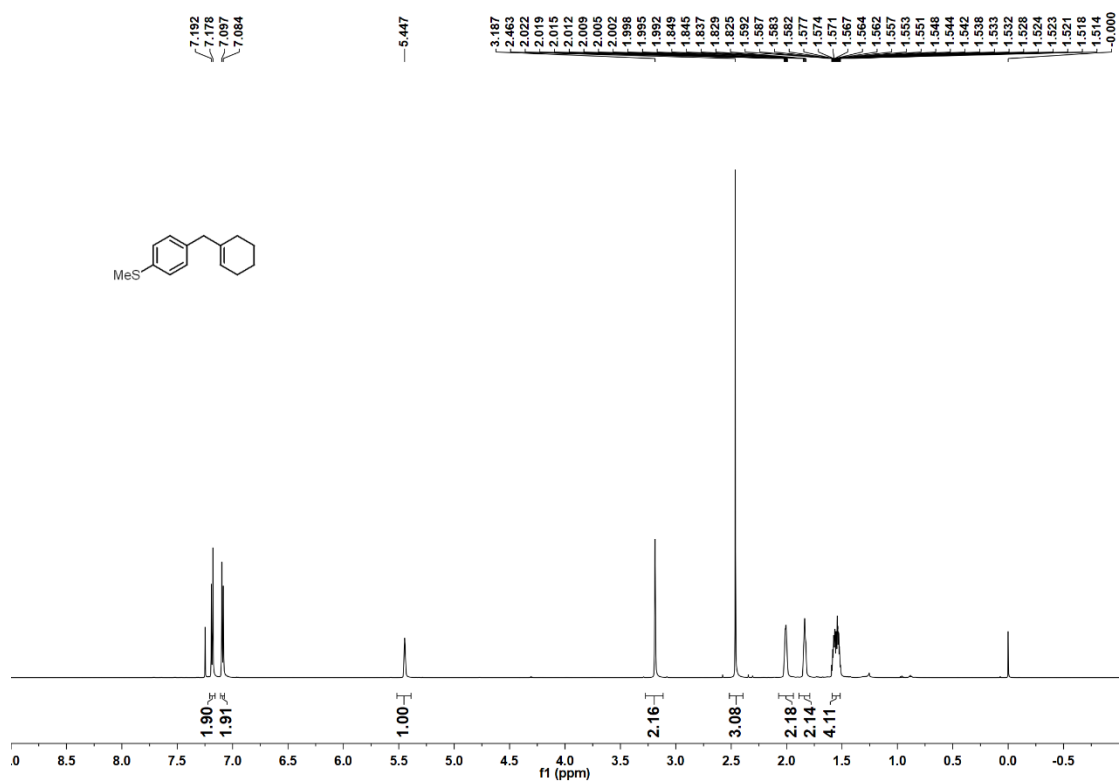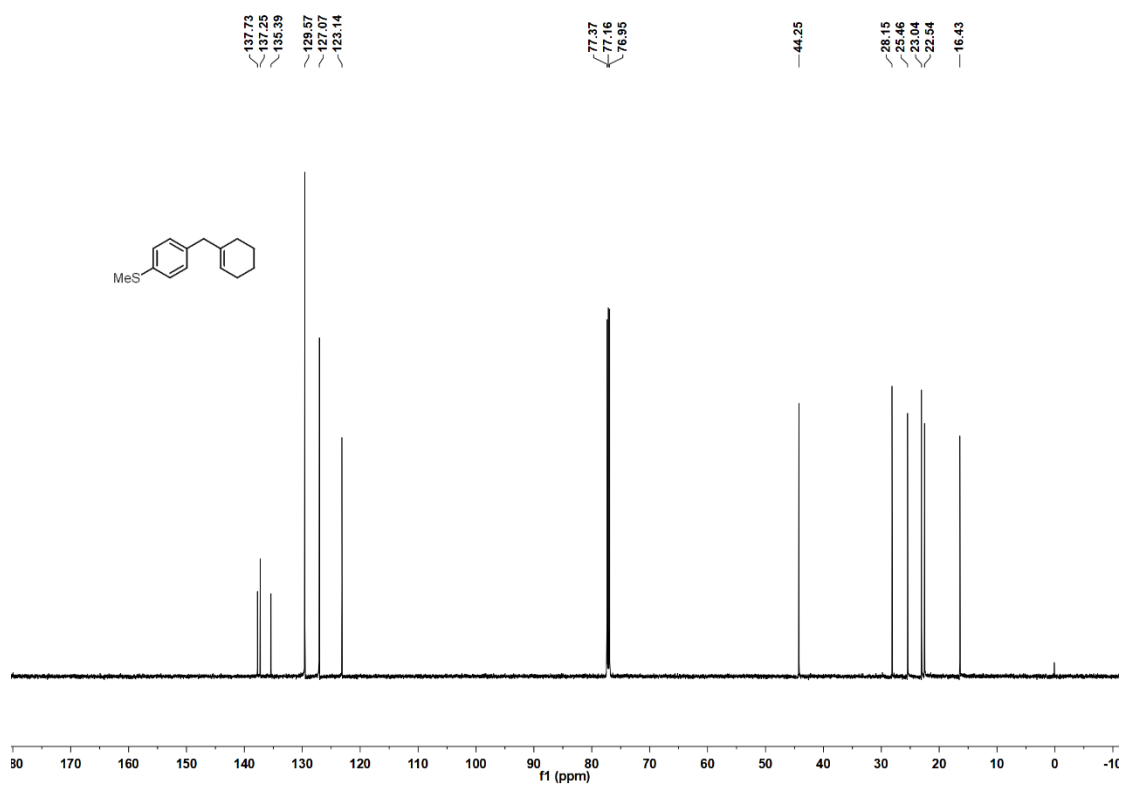

**3d,  $^1\text{H}$  NMR (400 MHz,  $\text{CDCl}_3$ );  $^{13}\text{C}$  NMR (100 MHz,  $\text{CDCl}_3$ )**

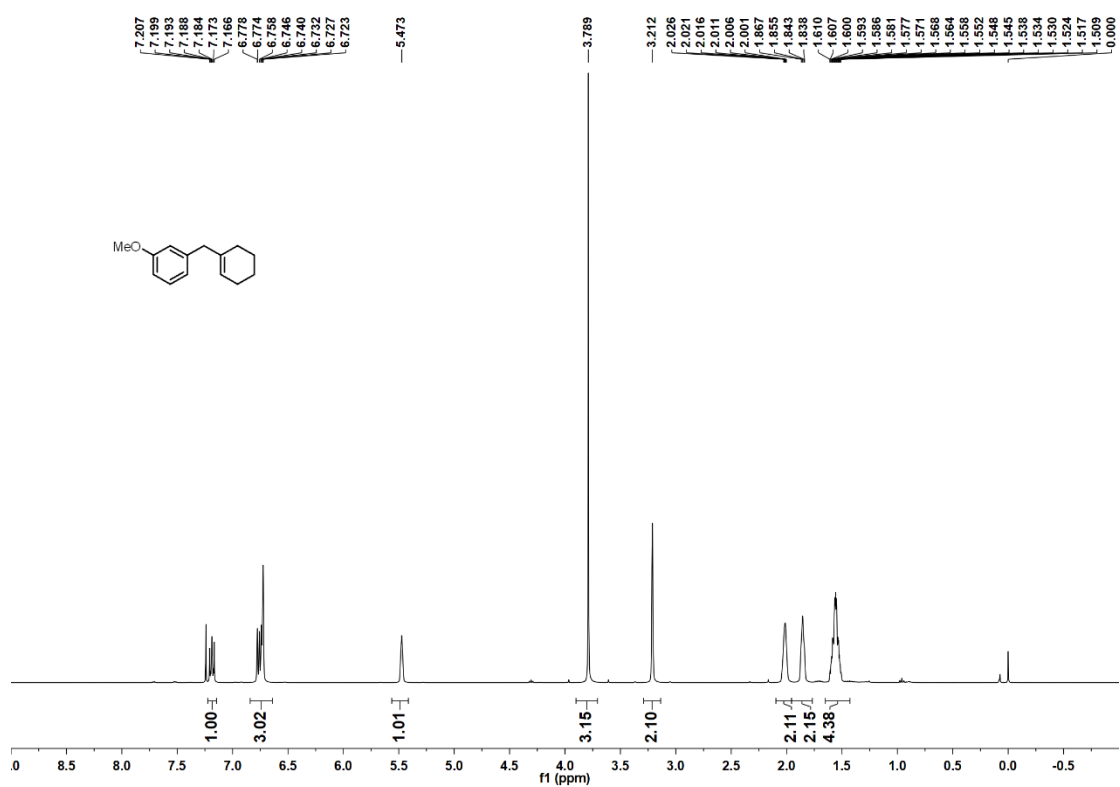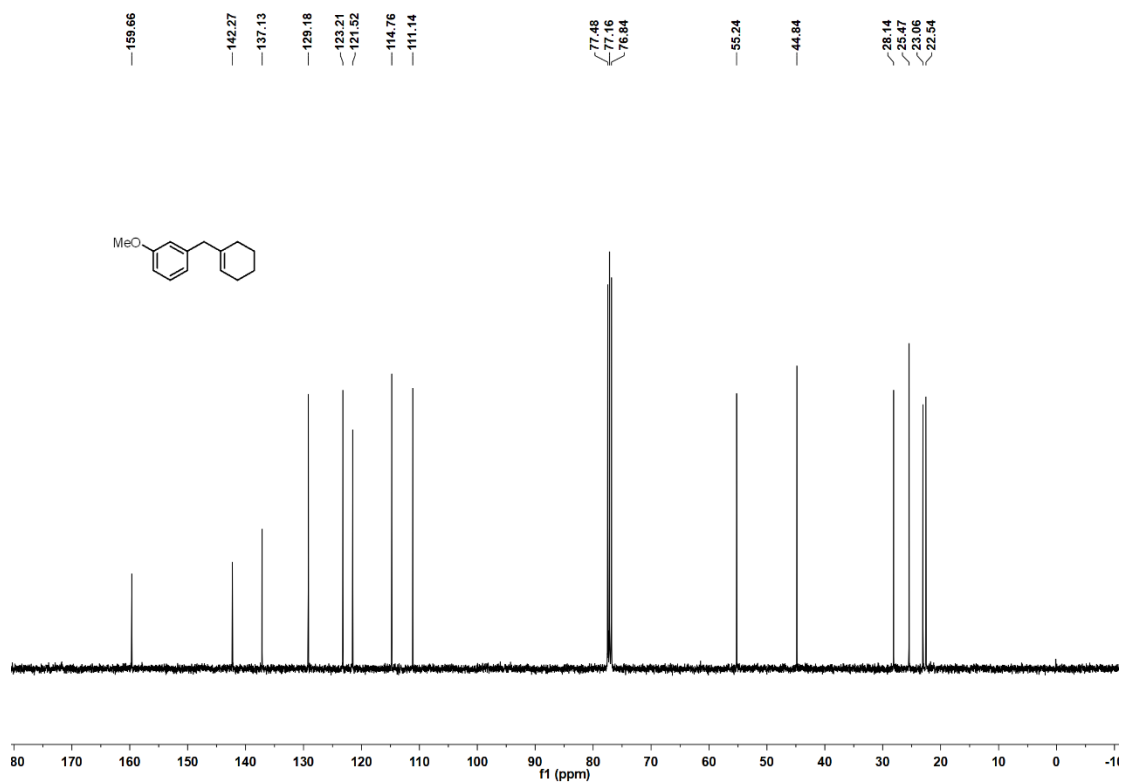

3e,  $^1\text{H}$  NMR (600 MHz,  $\text{CDCl}_3$ );  $^{13}\text{C}$  NMR (150 MHz,  $\text{CDCl}_3$ )

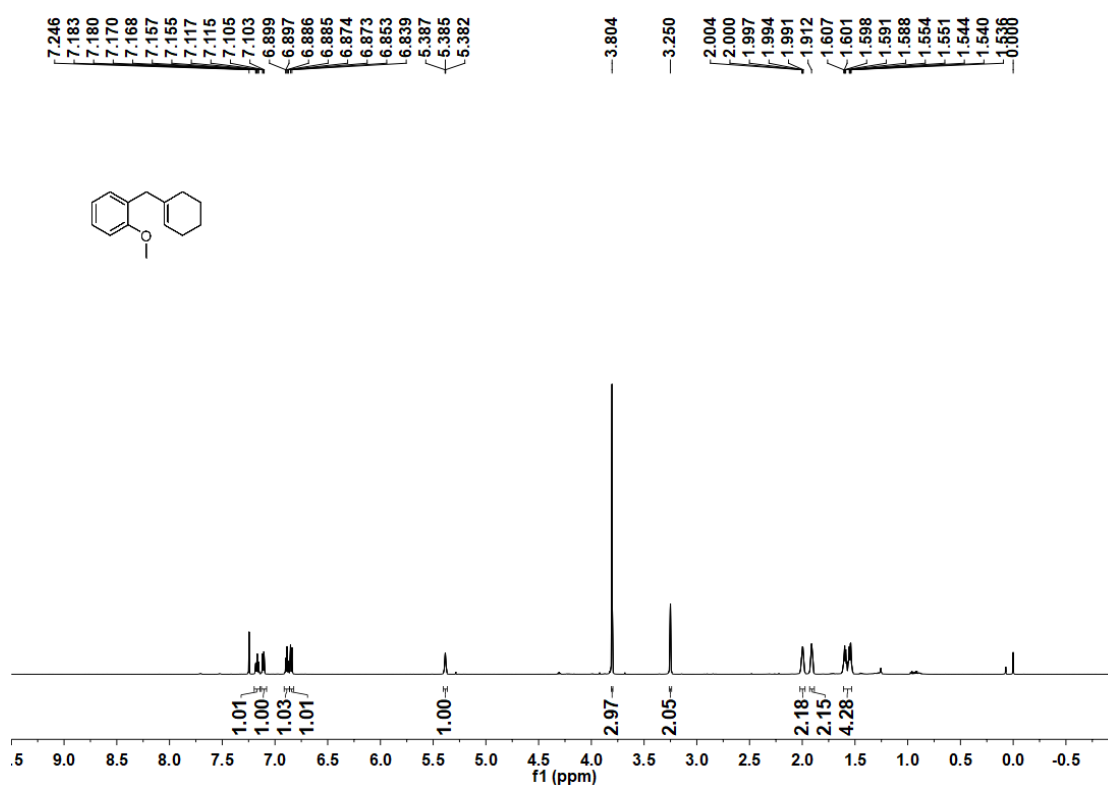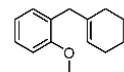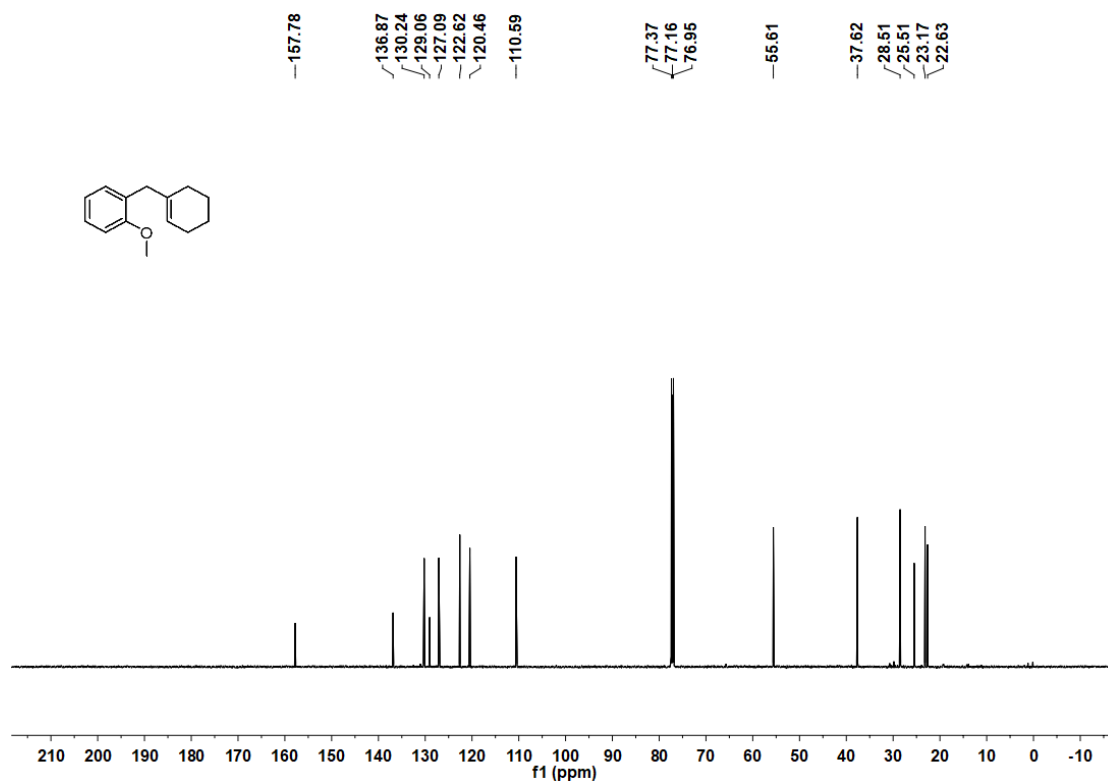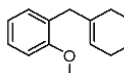

3f,  $^1\text{H}$  NMR (600 MHz,  $\text{CDCl}_3$ );  $^{13}\text{C}$  NMR (150 MHz,  $\text{CDCl}_3$ )

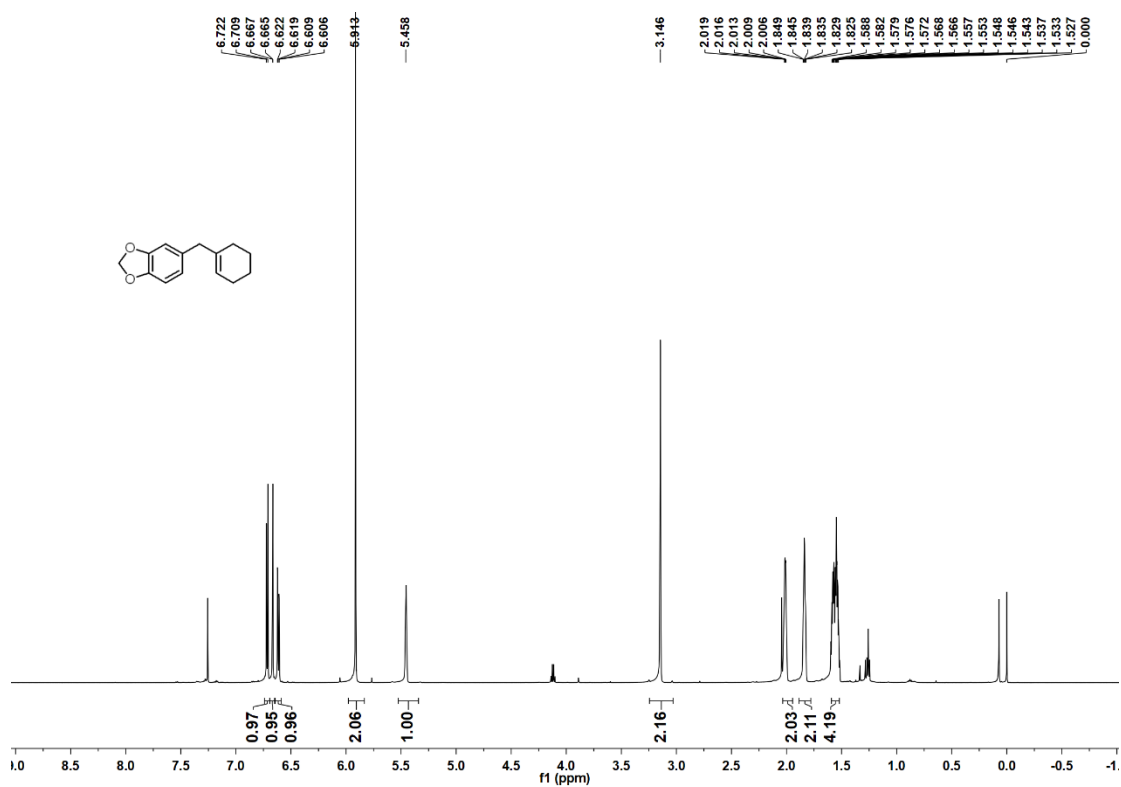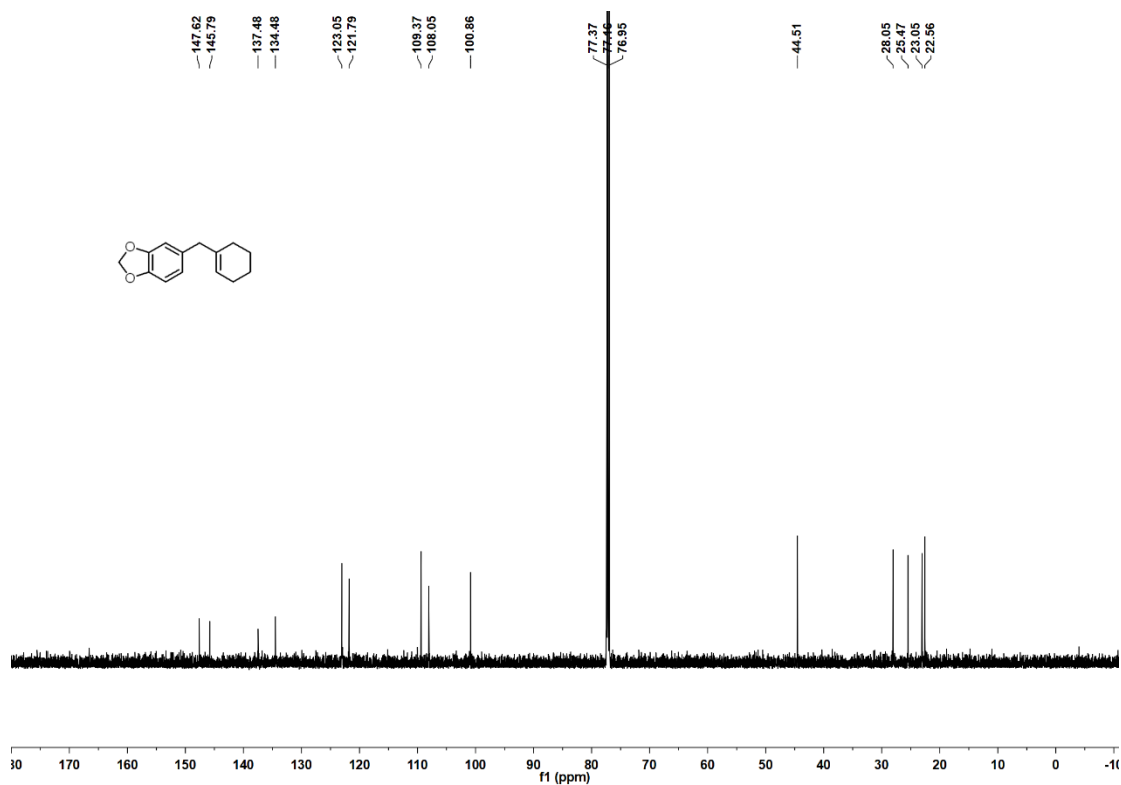

**3g,  $^1\text{H}$  NMR (600 MHz,  $\text{CDCl}_3$ );  $^{13}\text{C}$  NMR (150 MHz,  $\text{CDCl}_3$ )**

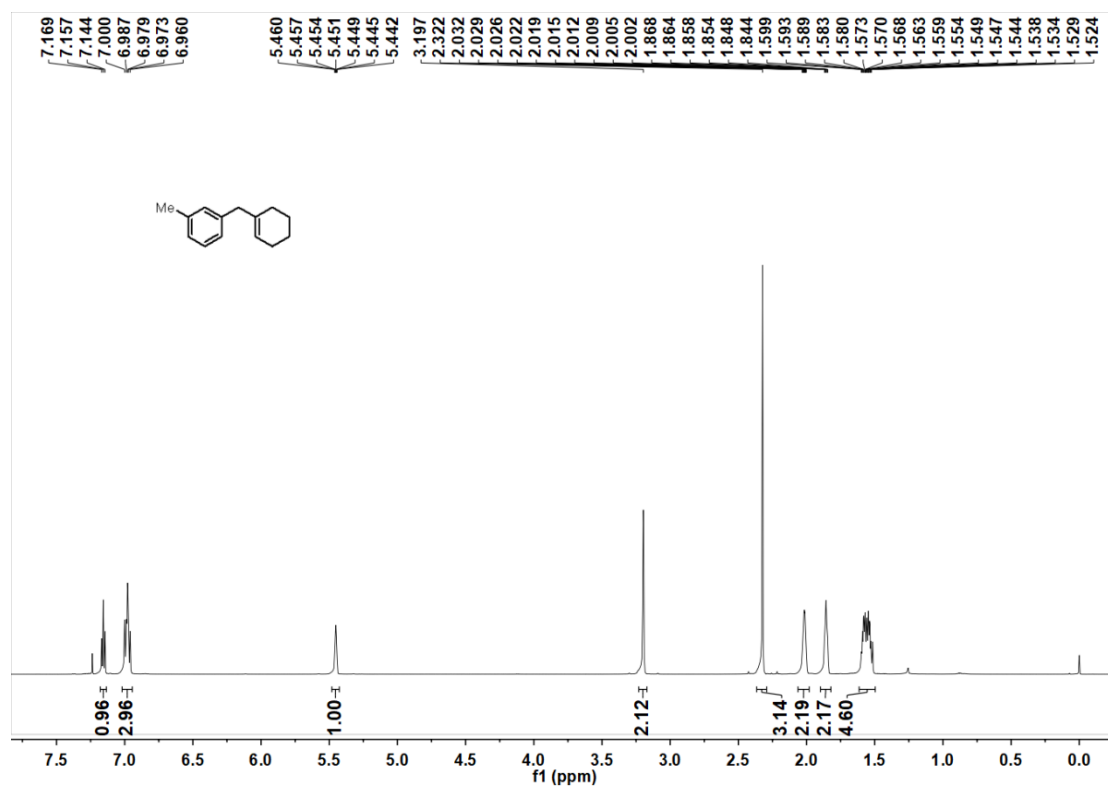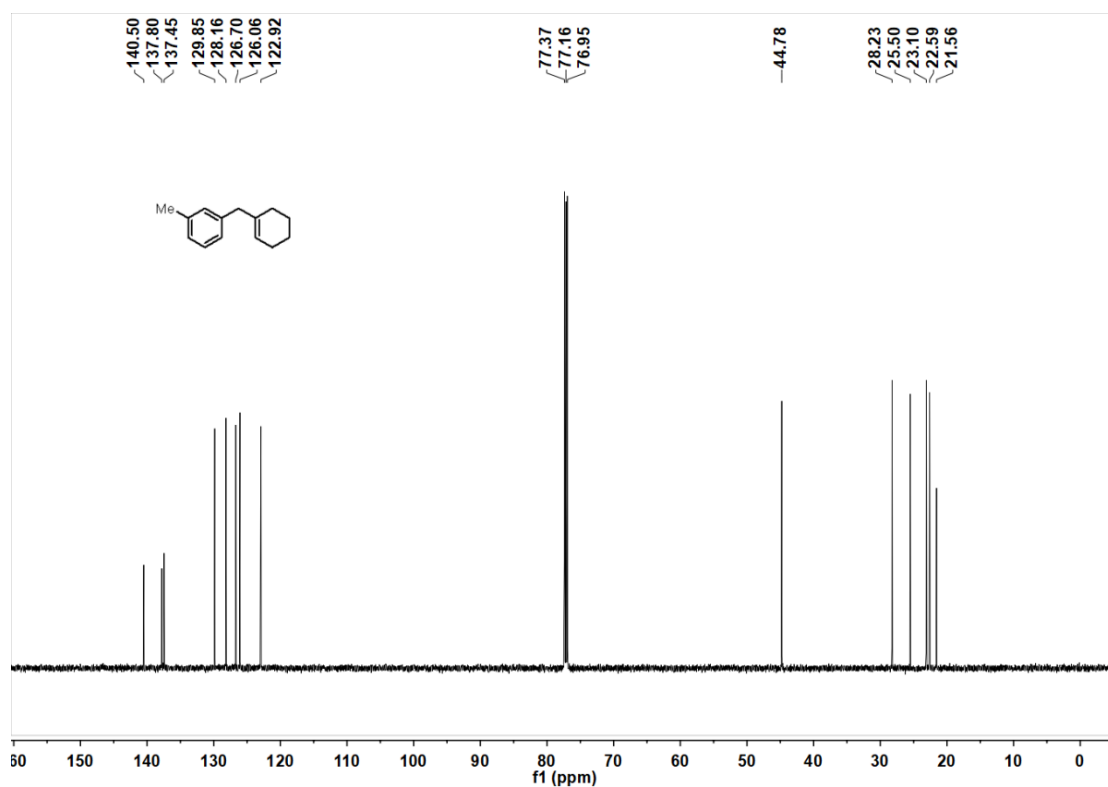

3h,  $^1\text{H}$  NMR (600 MHz,  $\text{CDCl}_3$ );  $^{13}\text{C}$  NMR (150 MHz,  $\text{CDCl}_3$ )

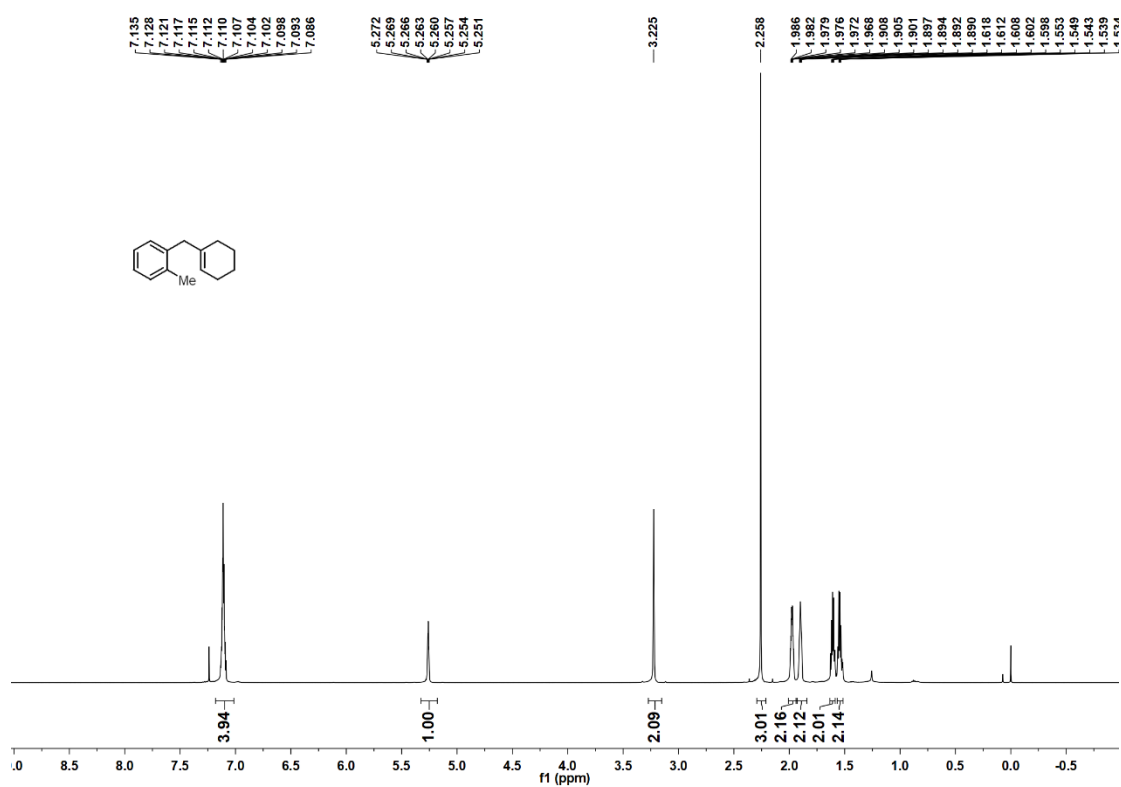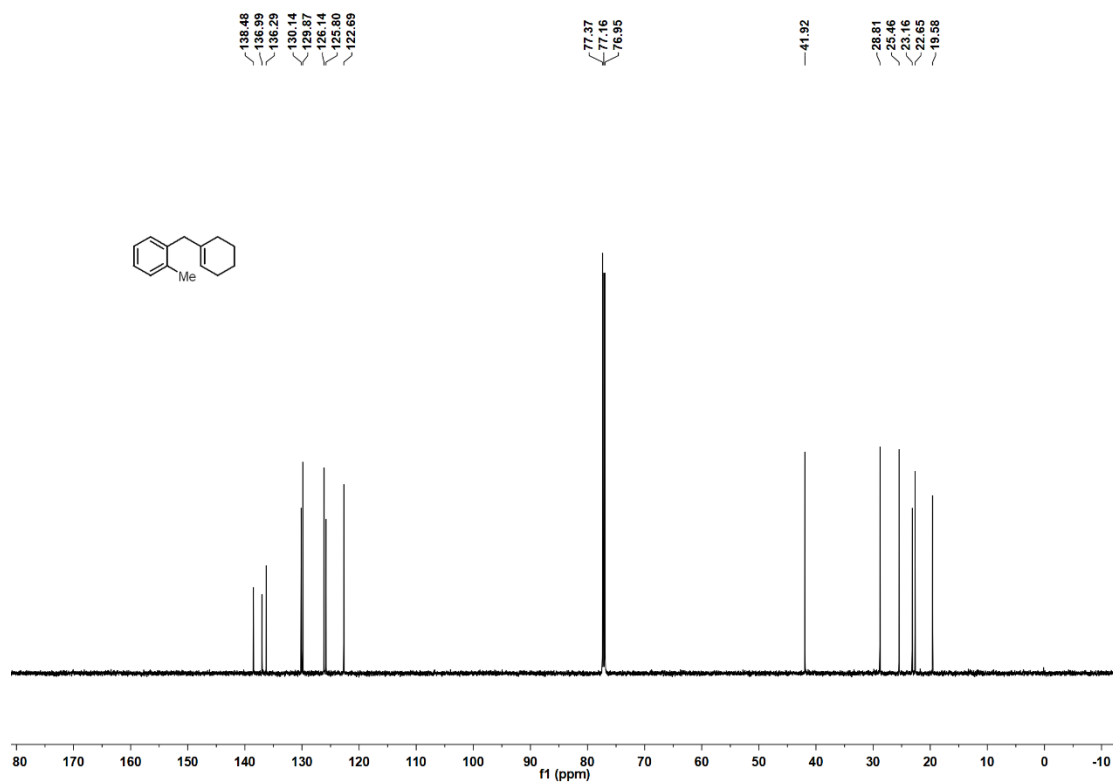

**3i,  $^1\text{H}$  NMR (400 MHz,  $\text{CDCl}_3$ );  $^{13}\text{C}$  NMR (100 MHz,  $\text{CDCl}_3$ )**

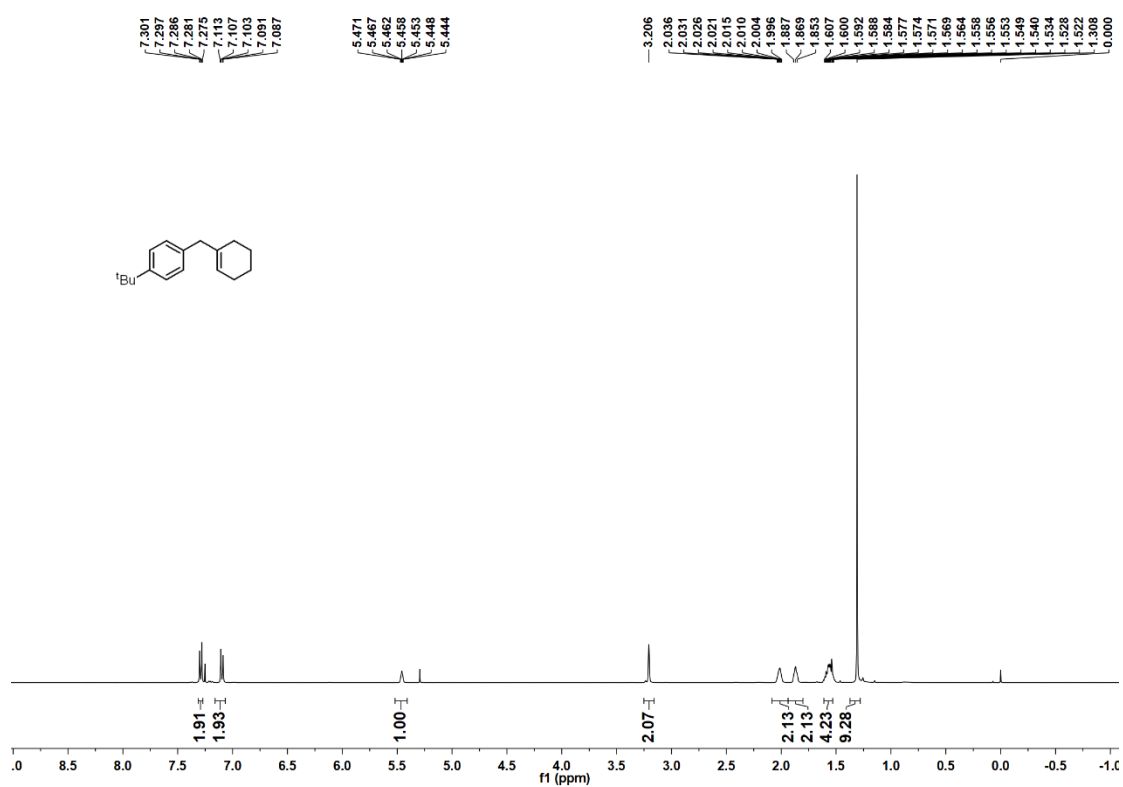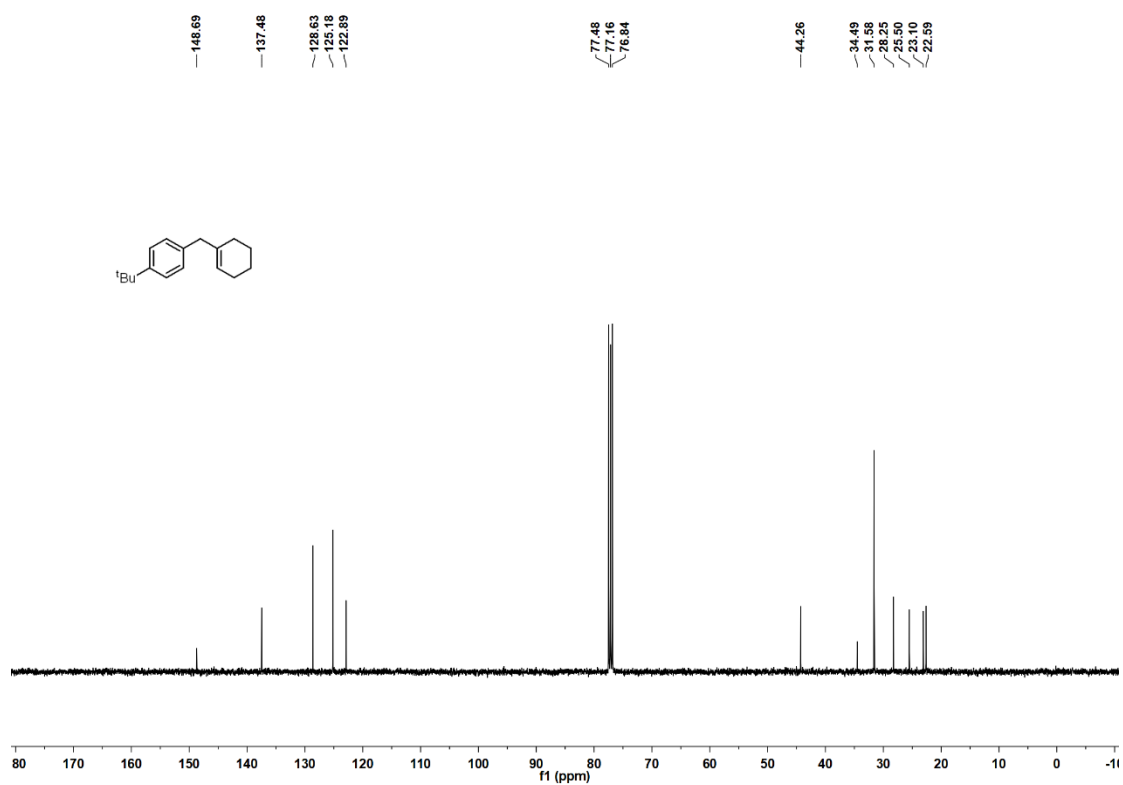



3j,  $^1\text{H}$  NMR (600 MHz,  $\text{CDCl}_3$ );  $^{13}\text{C}$  NMR (150 MHz,  $\text{CDCl}_3$ )

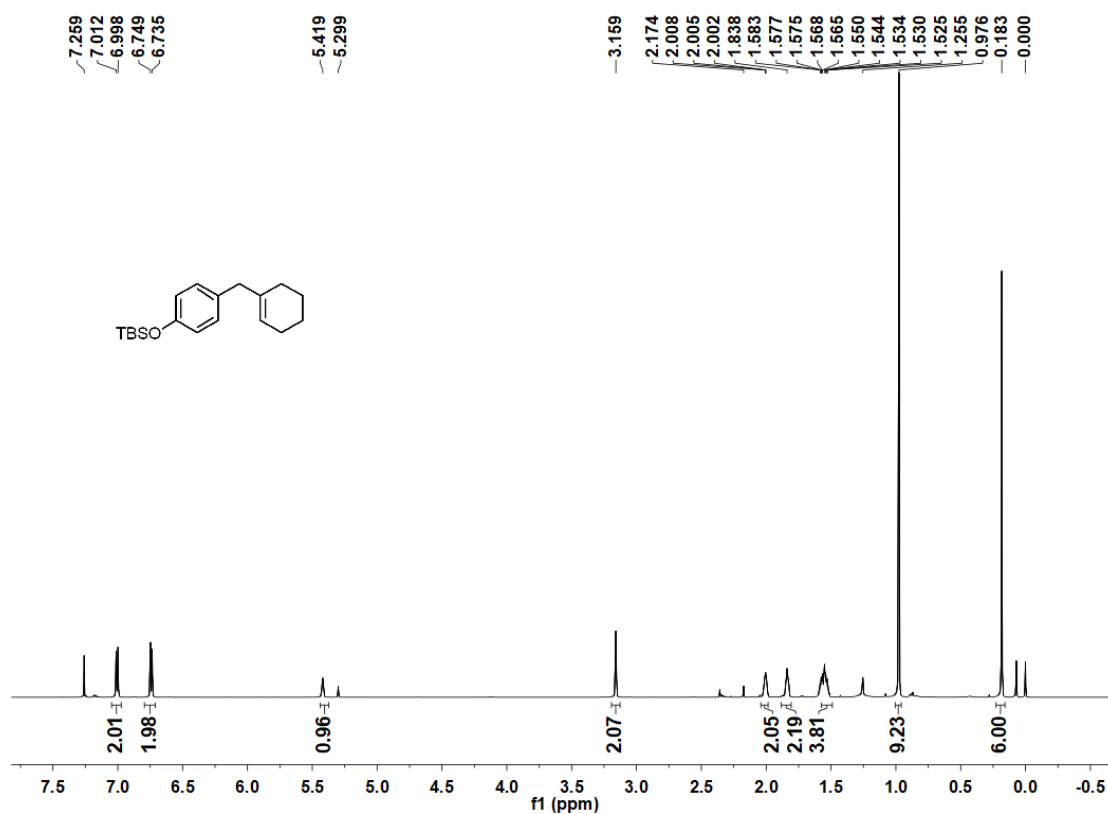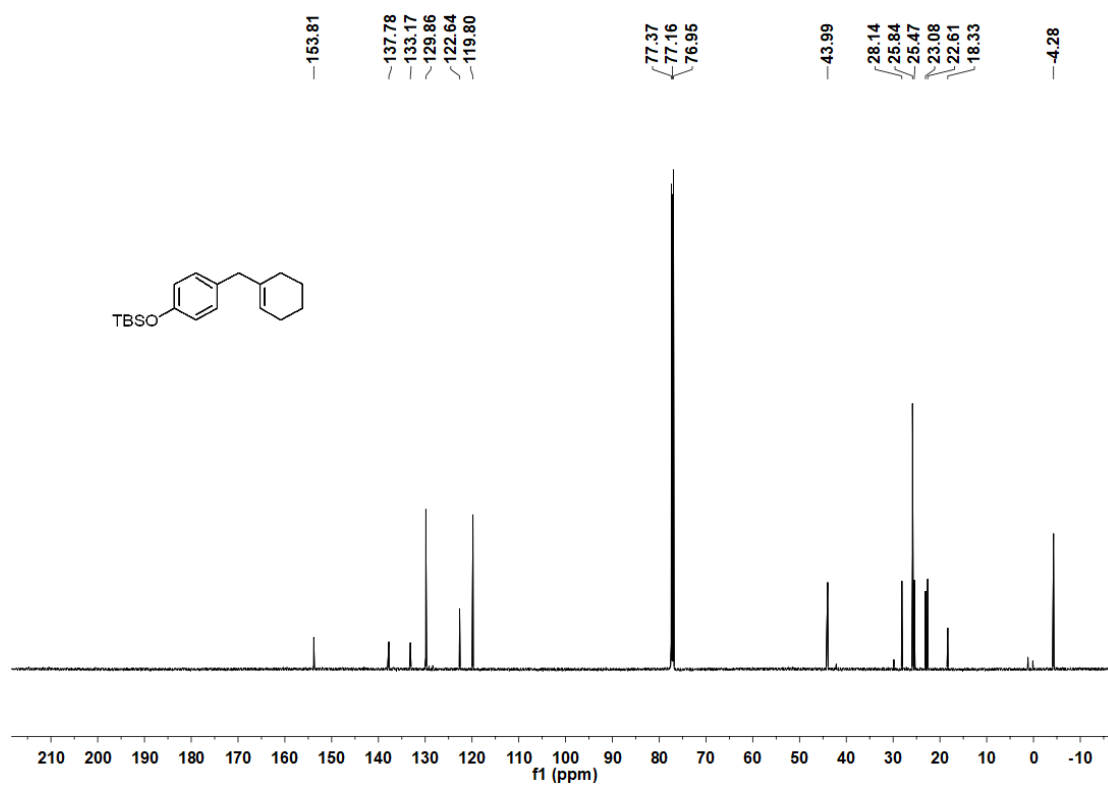

**3k,  $^1\text{H}$  NMR (400 MHz,  $\text{CDCl}_3$ );  $^{13}\text{C}$  NMR (100 MHz,  $\text{CDCl}_3$ )**

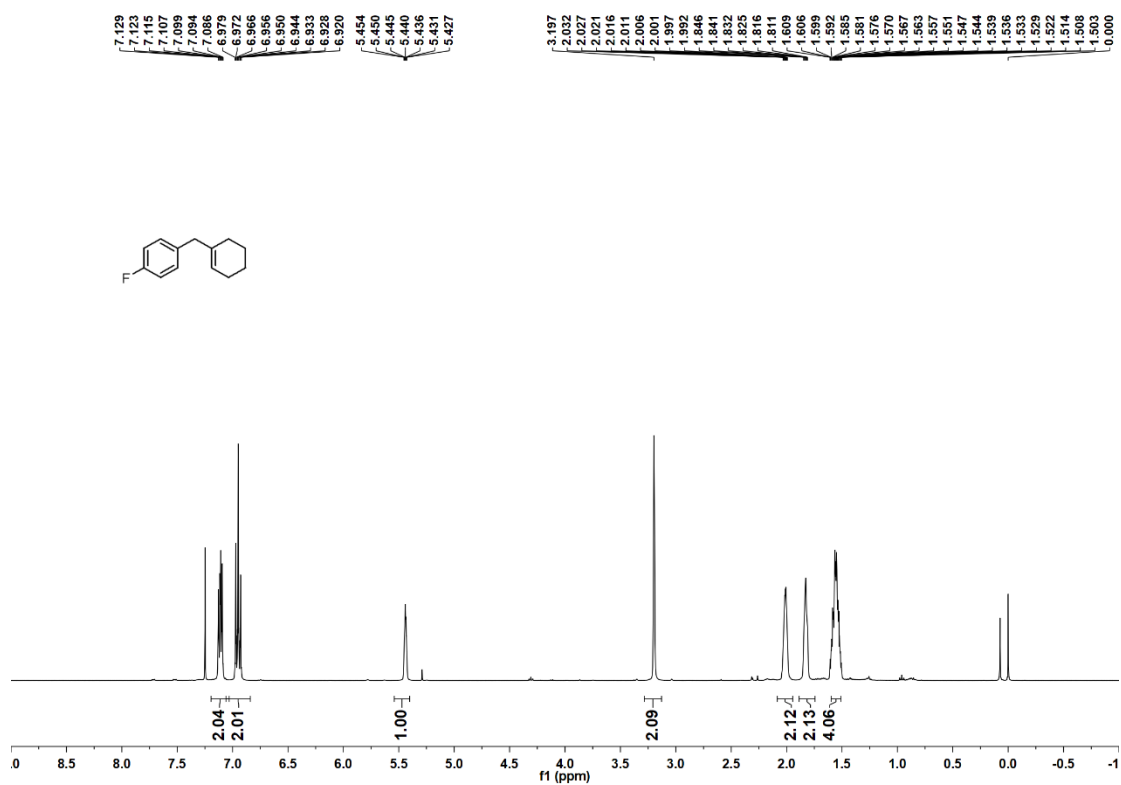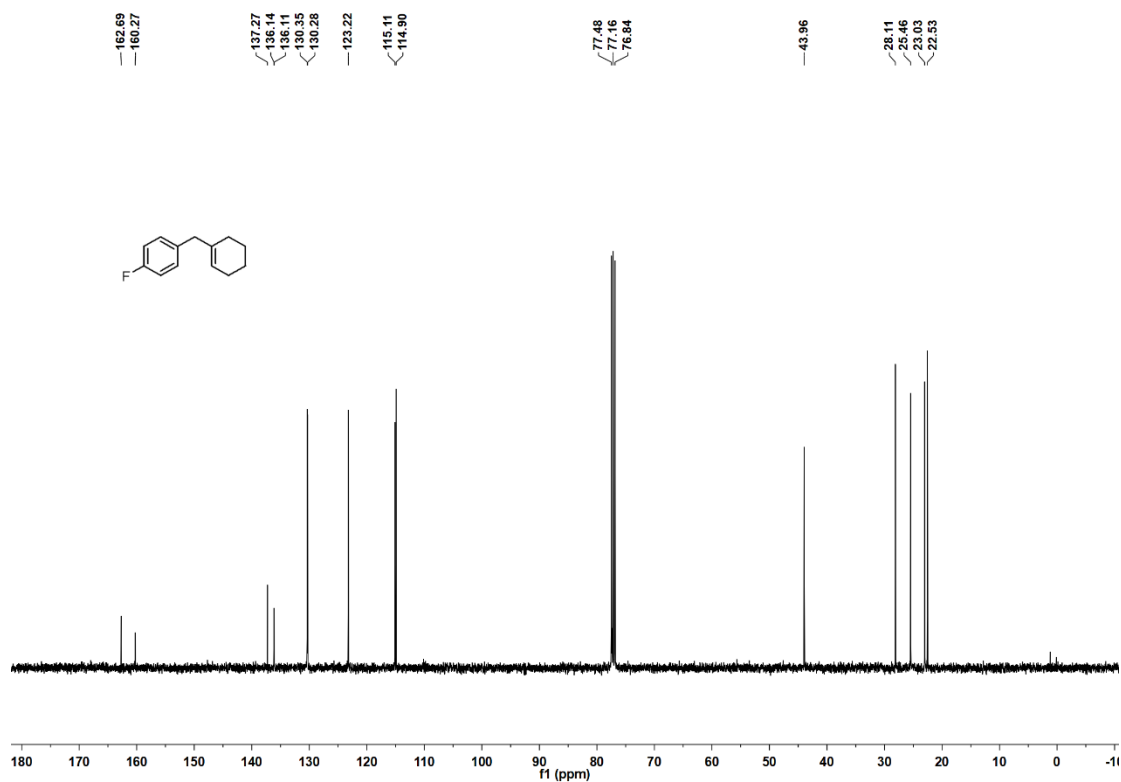

**3k,  $^{19}\text{F}$  NMR (376 MHz,  $\text{CDCl}_3$ )**

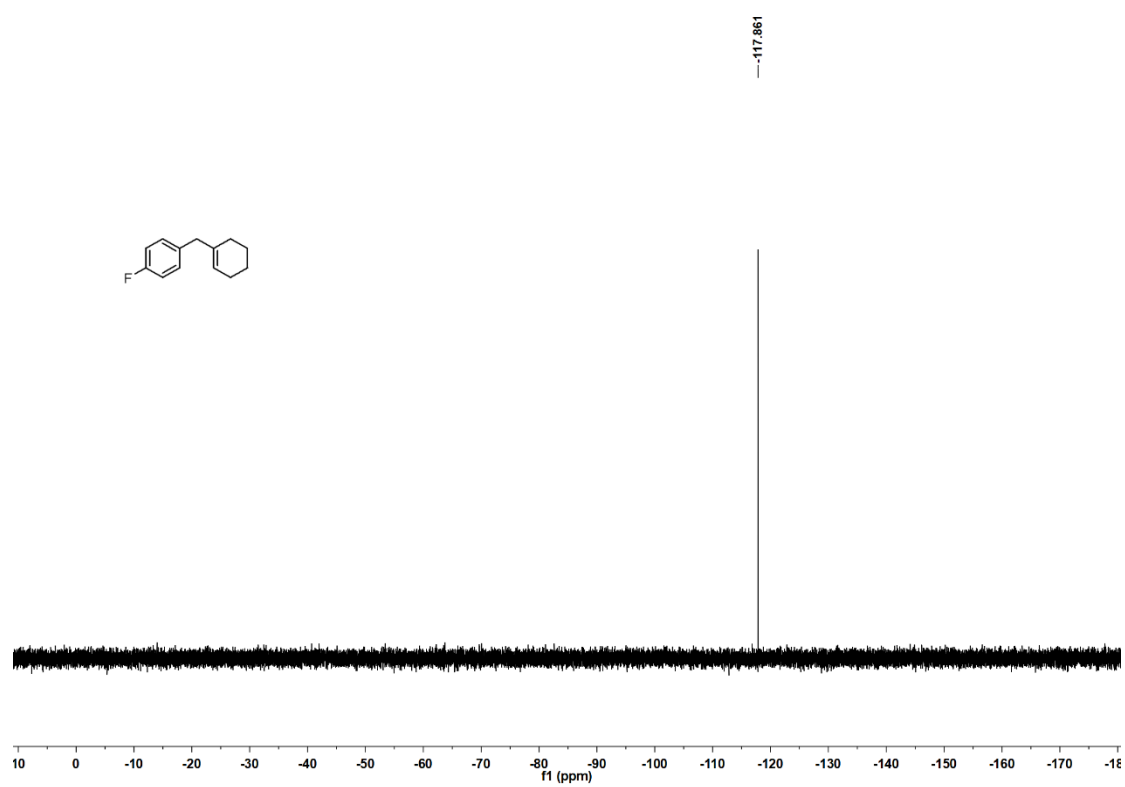

3l,  $^1\text{H}$  NMR (600 MHz,  $\text{CDCl}_3$ ),  $^{13}\text{C}$  NMR (150 MHz,  $\text{CDCl}_3$ )

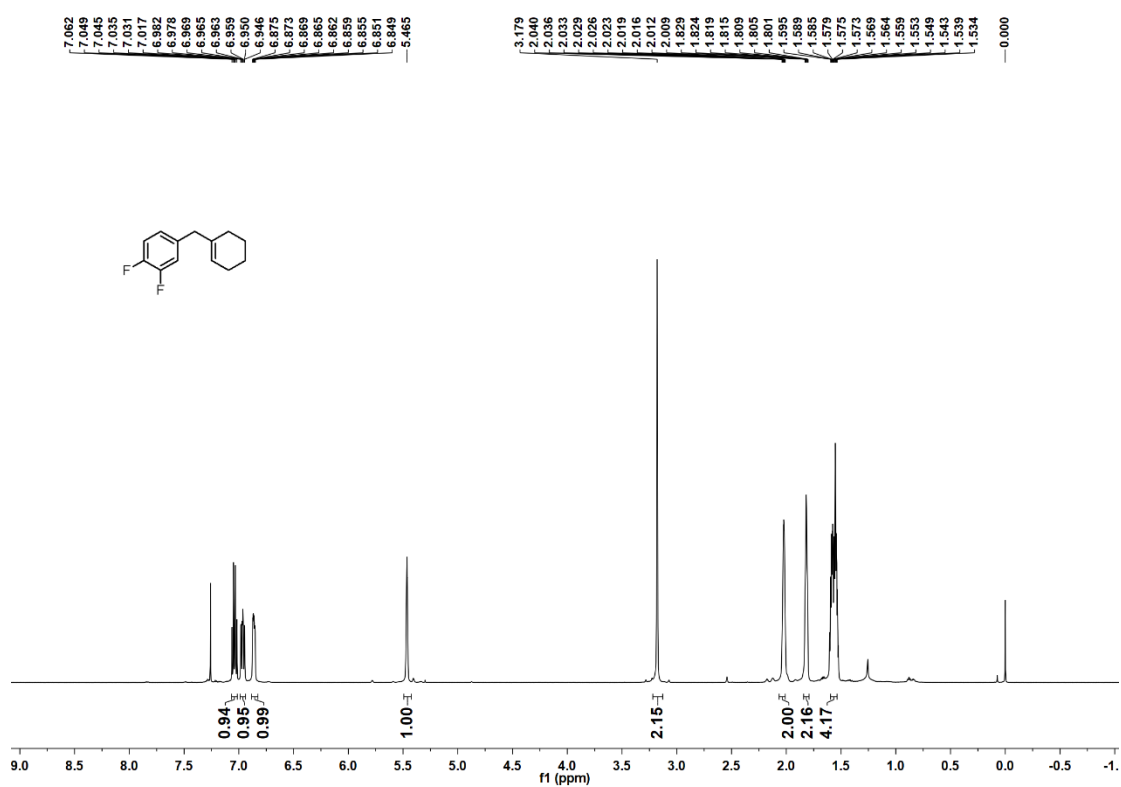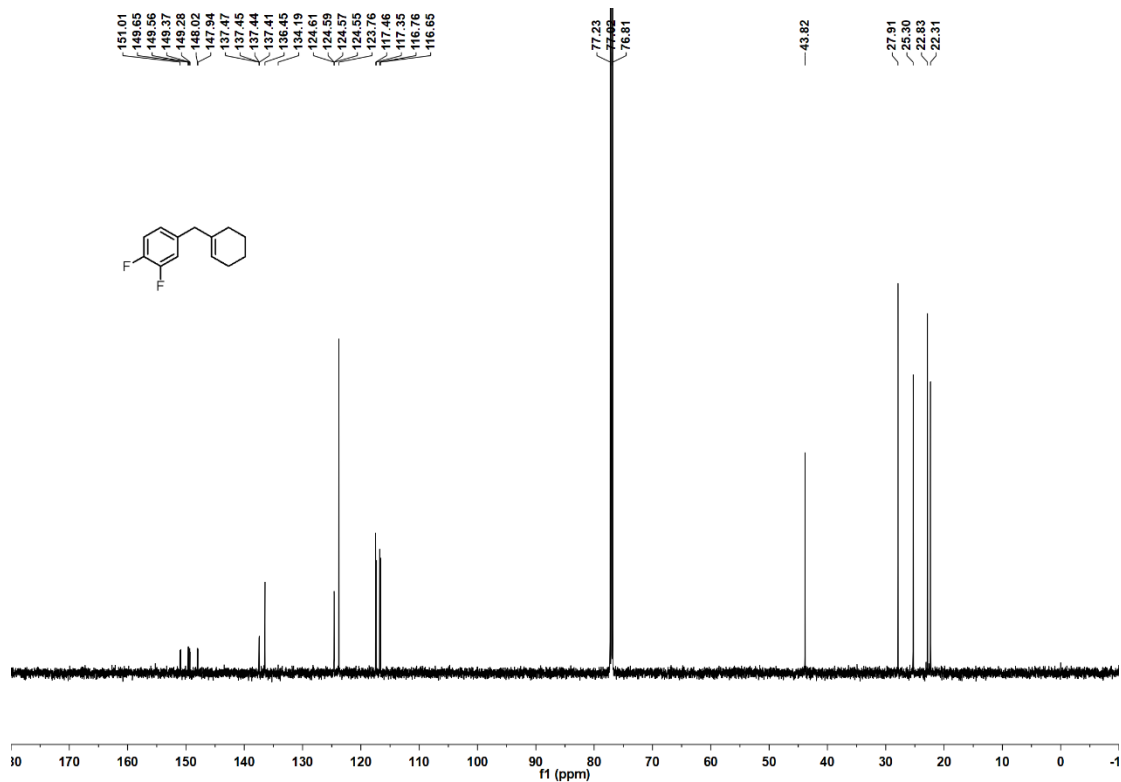

**3l,  $^{19}\text{F}$  NMR (376 MHz,  $\text{CDCl}_3$ )**

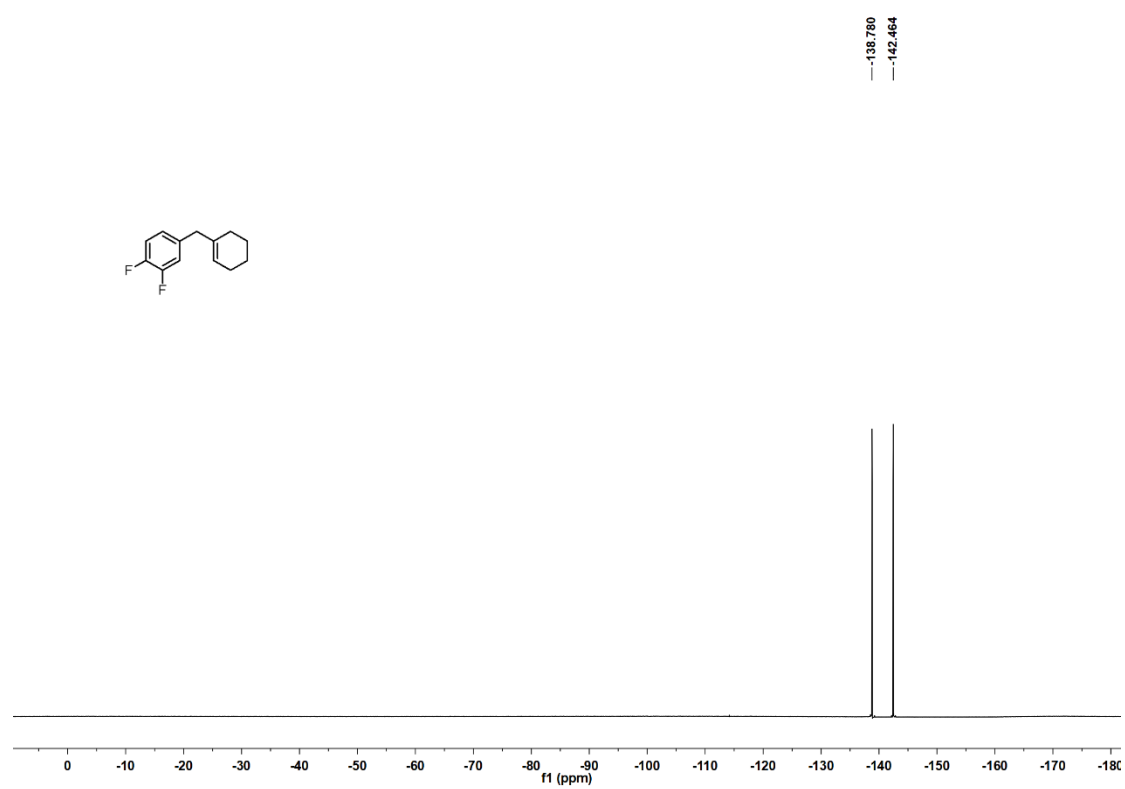

3m,  $^1\text{H}$  NMR (600 MHz,  $\text{CDCl}_3$ );  $^{13}\text{C}$  NMR (150 MHz,  $\text{CDCl}_3$ )

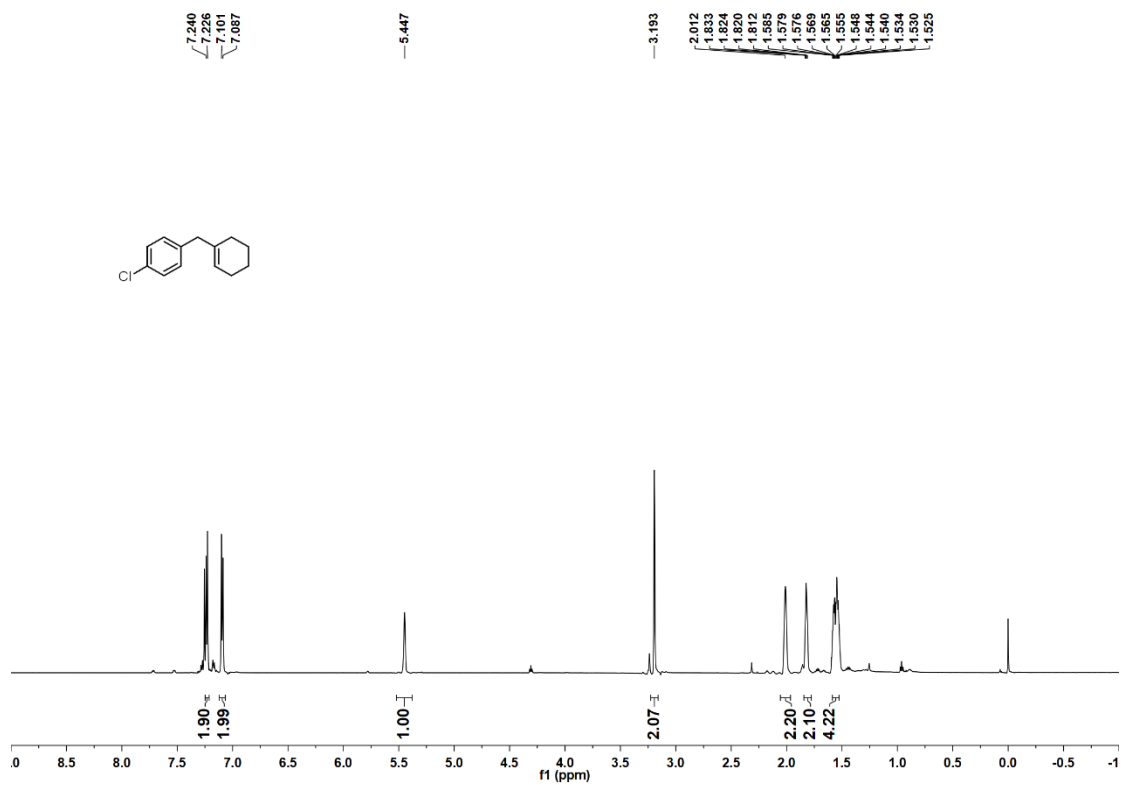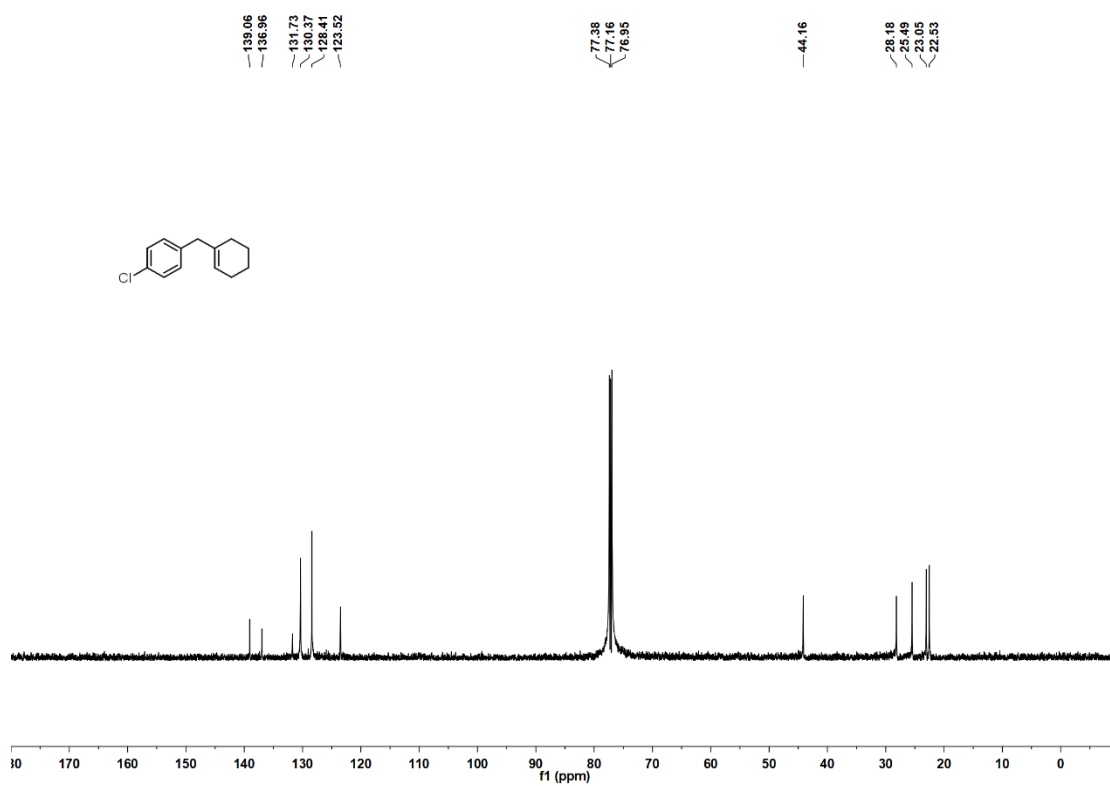

**3n,  $^1\text{H}$  NMR (400 MHz,  $\text{CDCl}_3$ );  $^{13}\text{C}$  NMR (100 MHz,  $\text{CDCl}_3$ )**

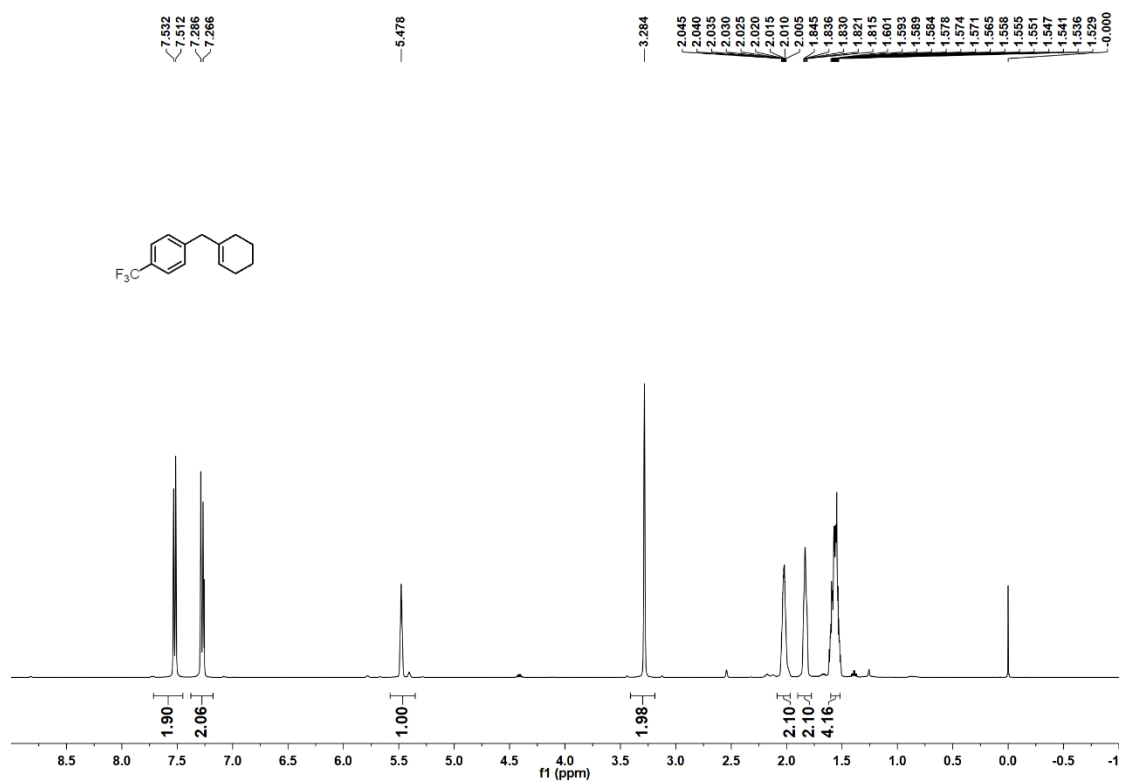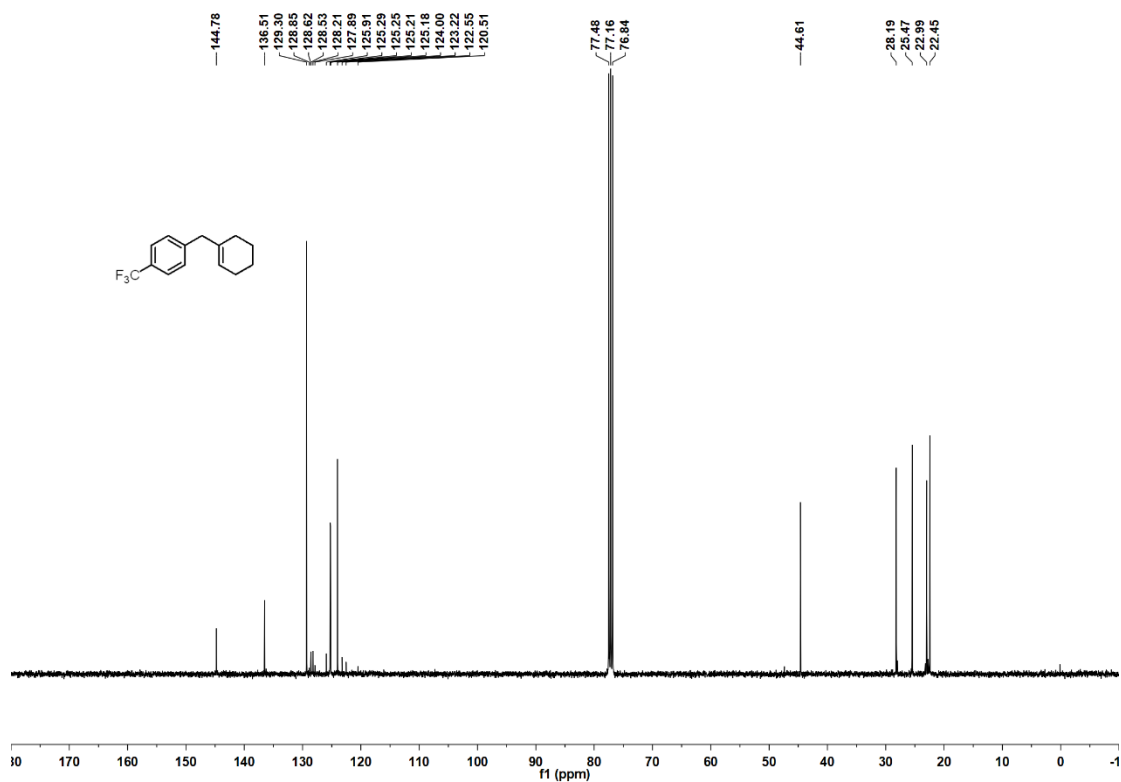

**3n,  $^{19}\text{F}$  NMR (376 MHz,  $\text{CDCl}_3$ )**

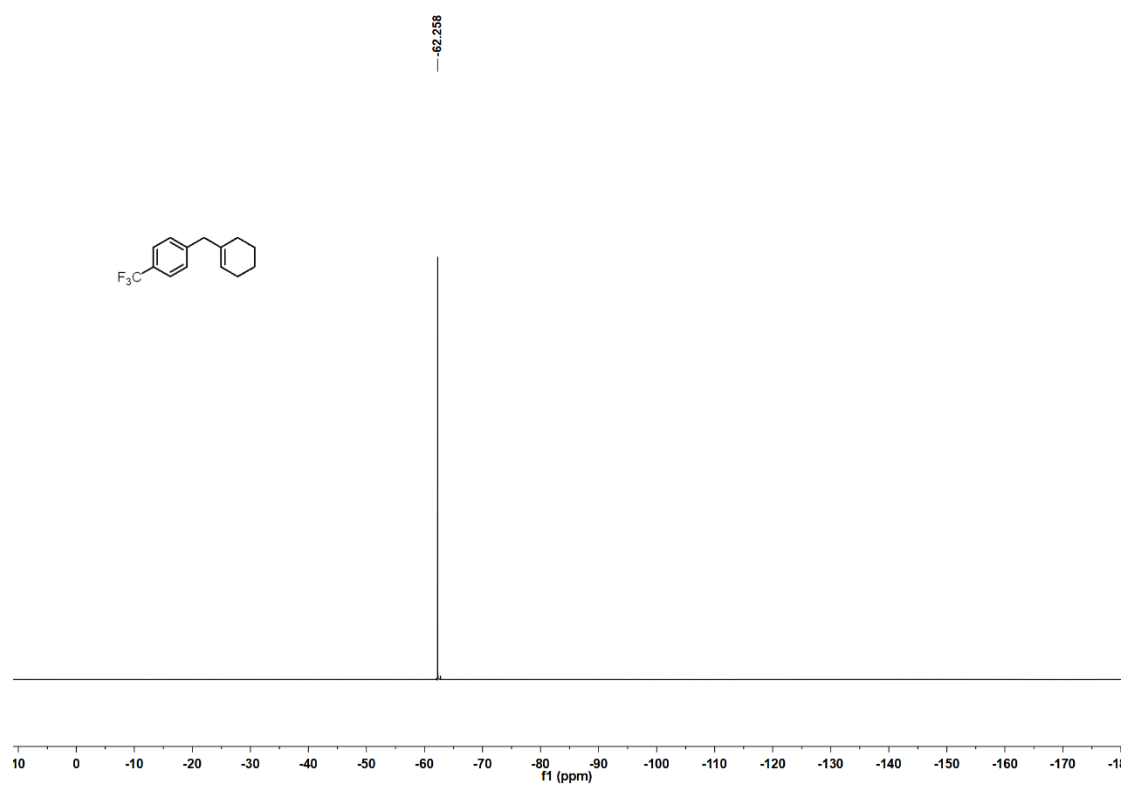



3p,  $^1\text{H}$  NMR (600 MHz,  $\text{CDCl}_3$ );  $^{13}\text{C}$  NMR (150 MHz,  $\text{CDCl}_3$ )

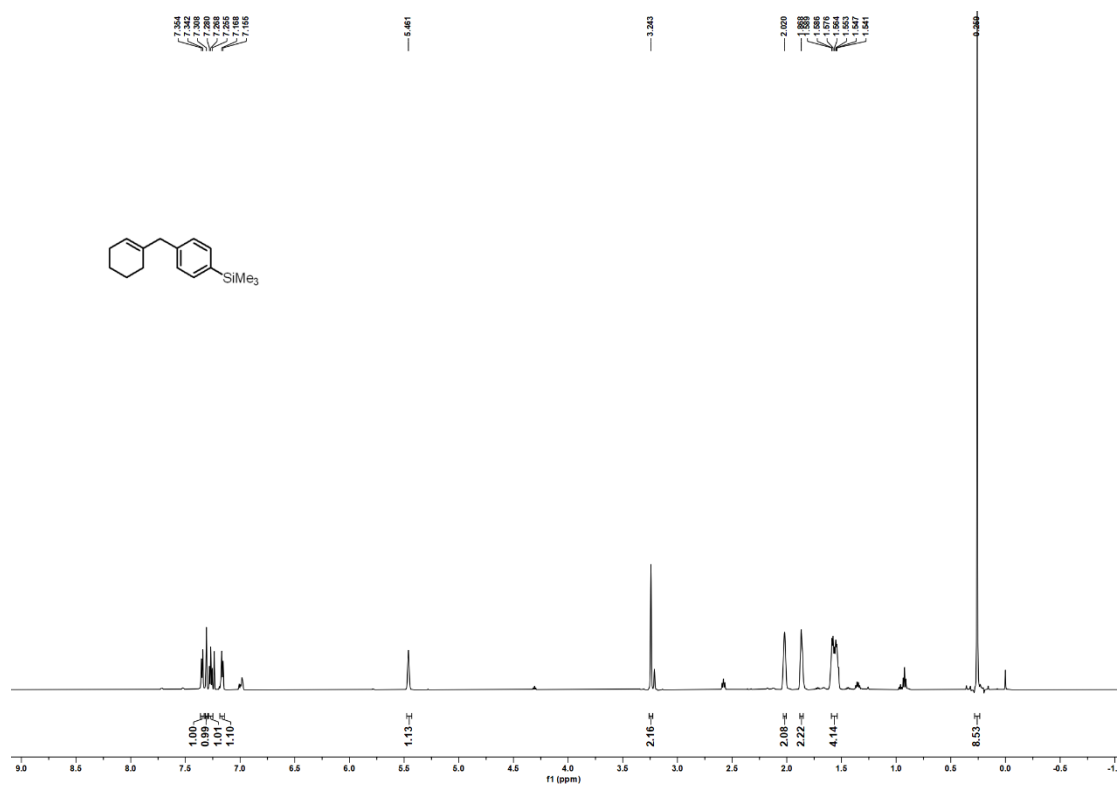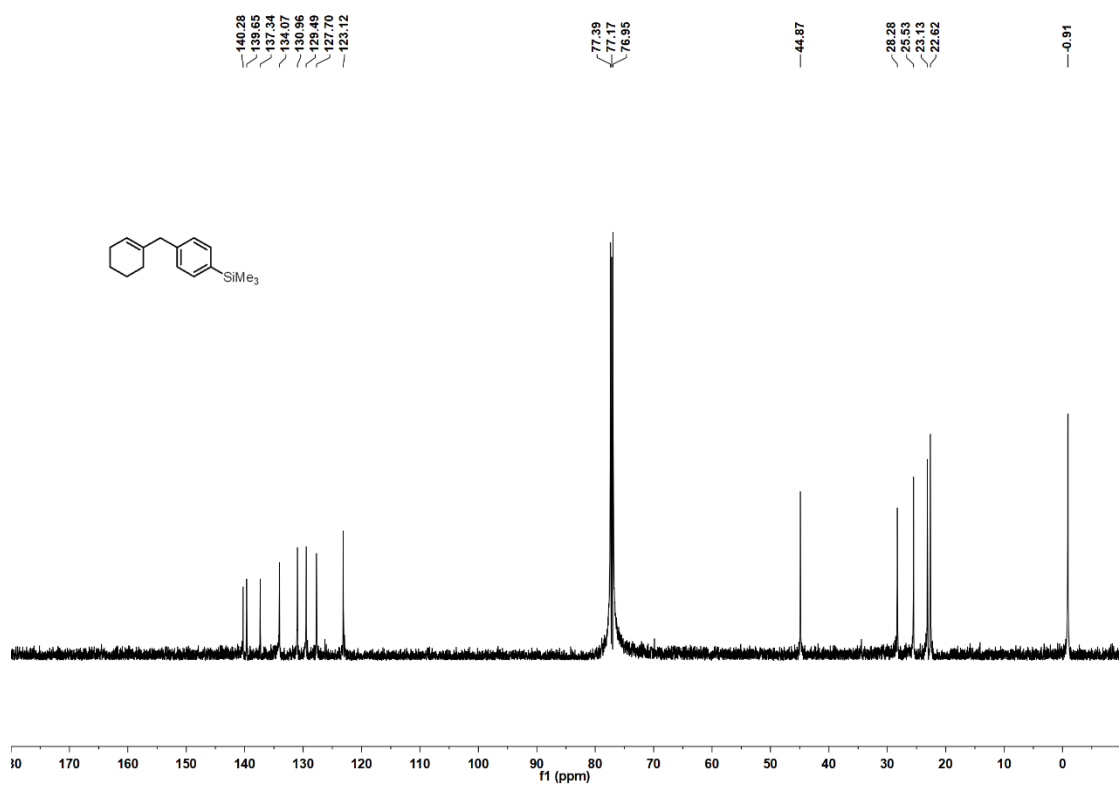

**3q,  $^1\text{H}$  NMR (600 MHz,  $\text{CDCl}_3$ );  $^{13}\text{C}$  NMR (150 MHz,  $\text{CDCl}_3$ )**

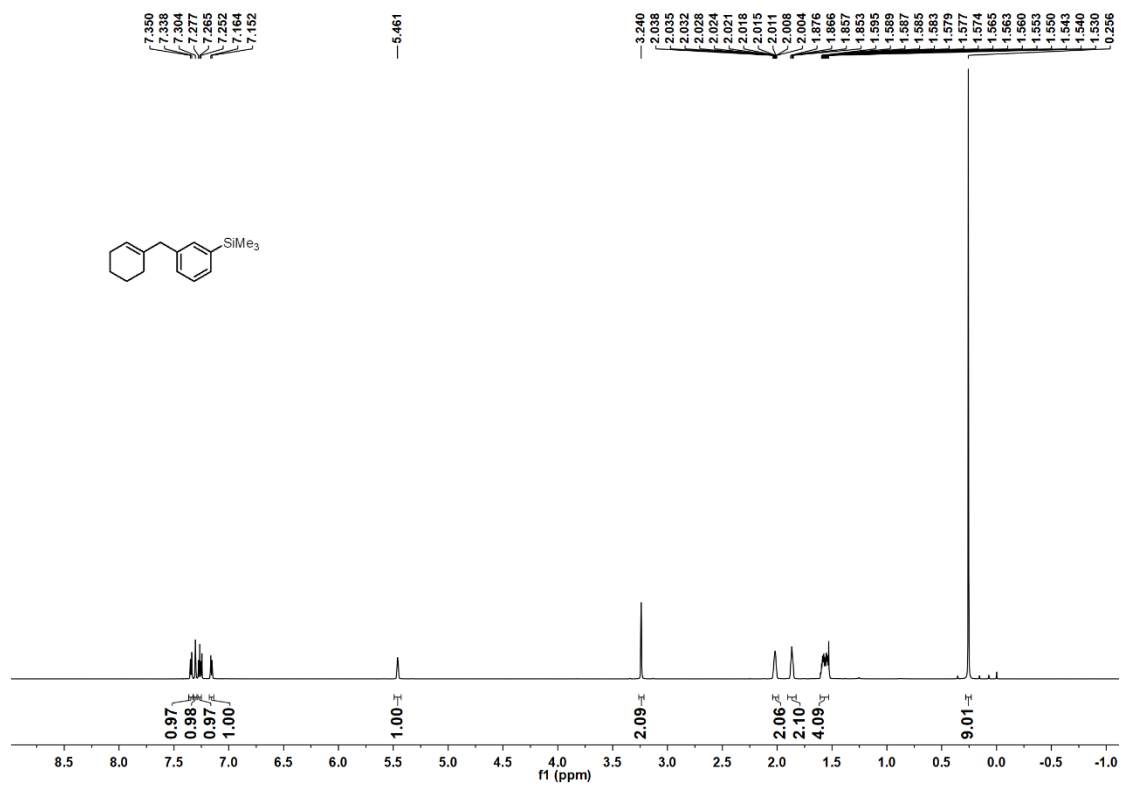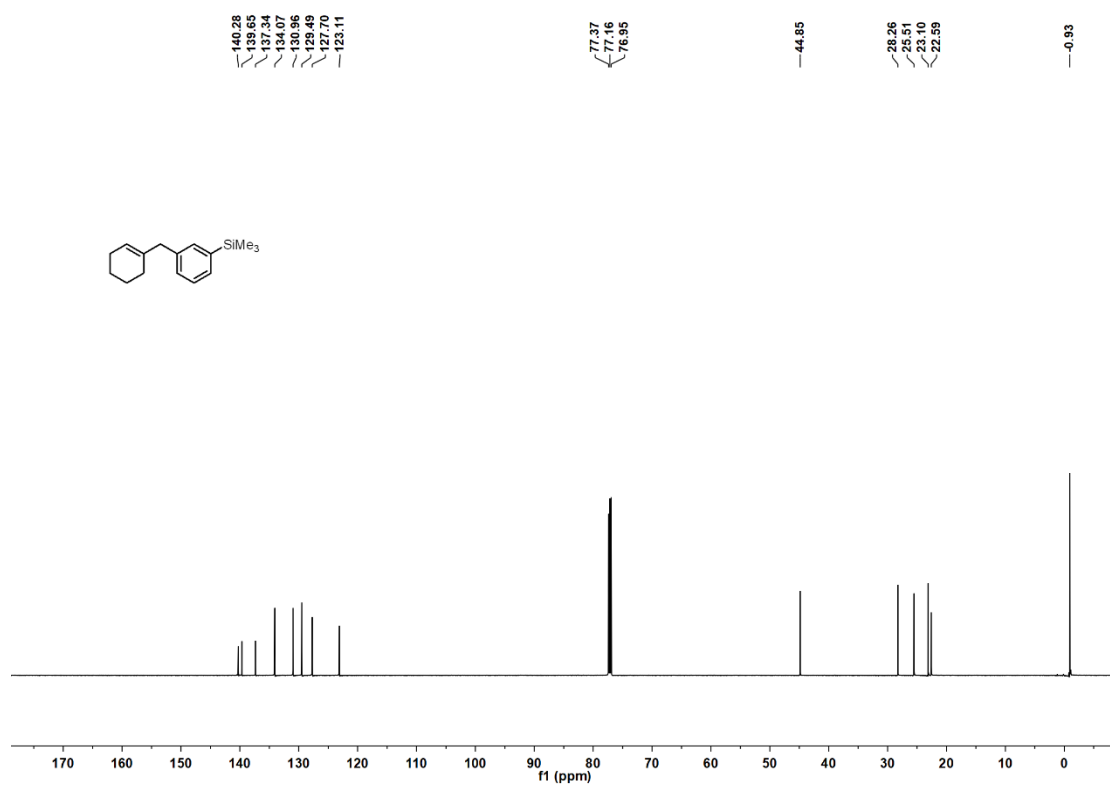

3r,  $^1\text{H}$  NMR (400 MHz,  $\text{CDCl}_3$ );  $^{13}\text{C}$  NMR (100 MHz,  $\text{CDCl}_3$ )

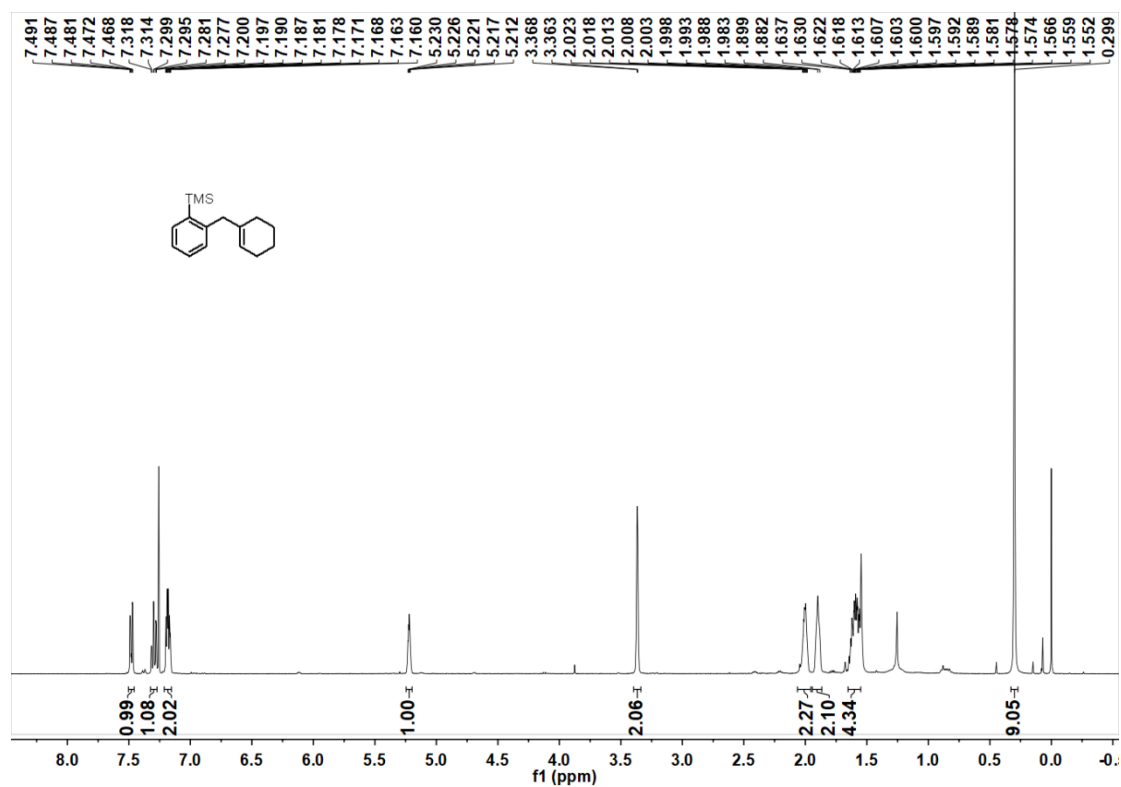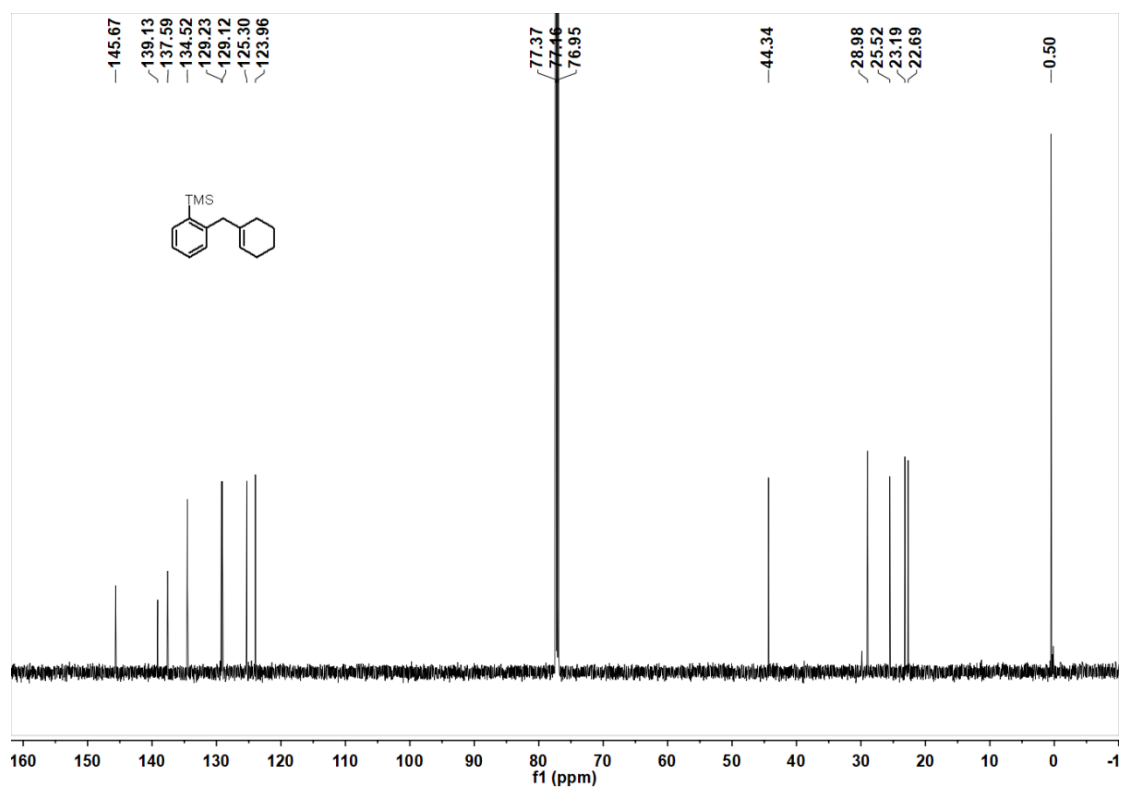

3s,  $^1\text{H}$  NMR (400 MHz,  $\text{CDCl}_3$ );  $^{13}\text{C}$  NMR (100 MHz,  $\text{CDCl}_3$ )

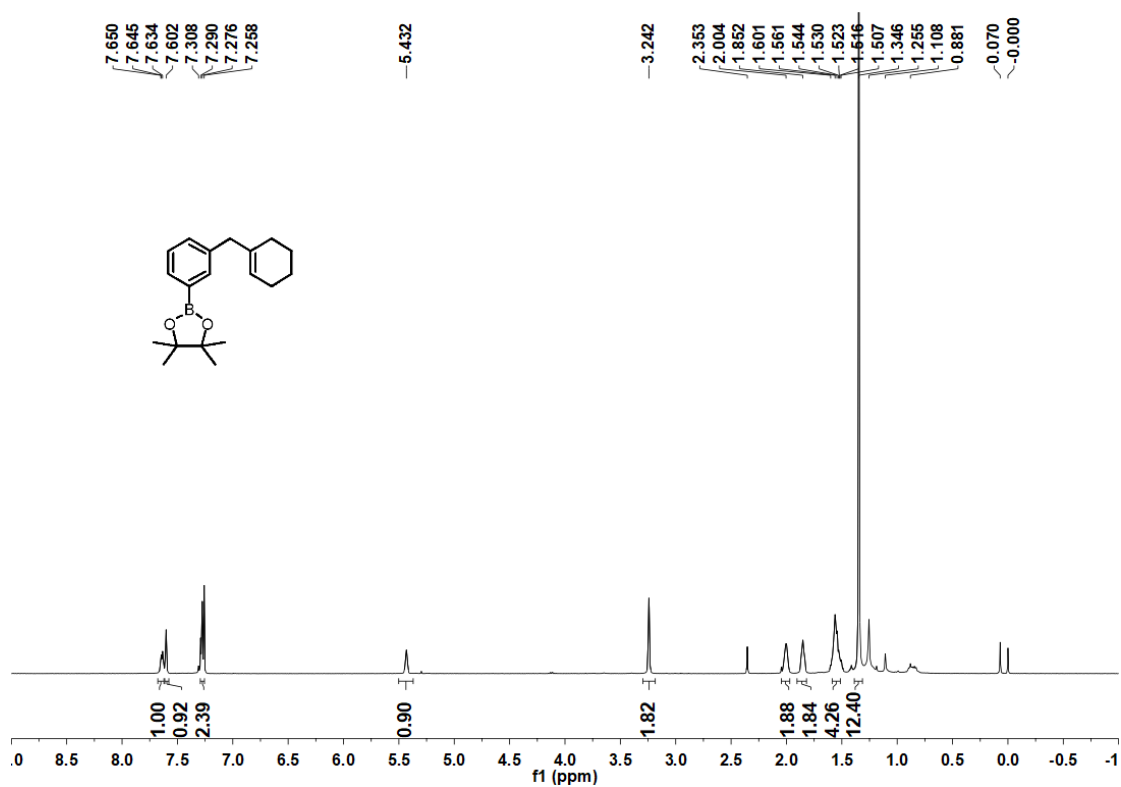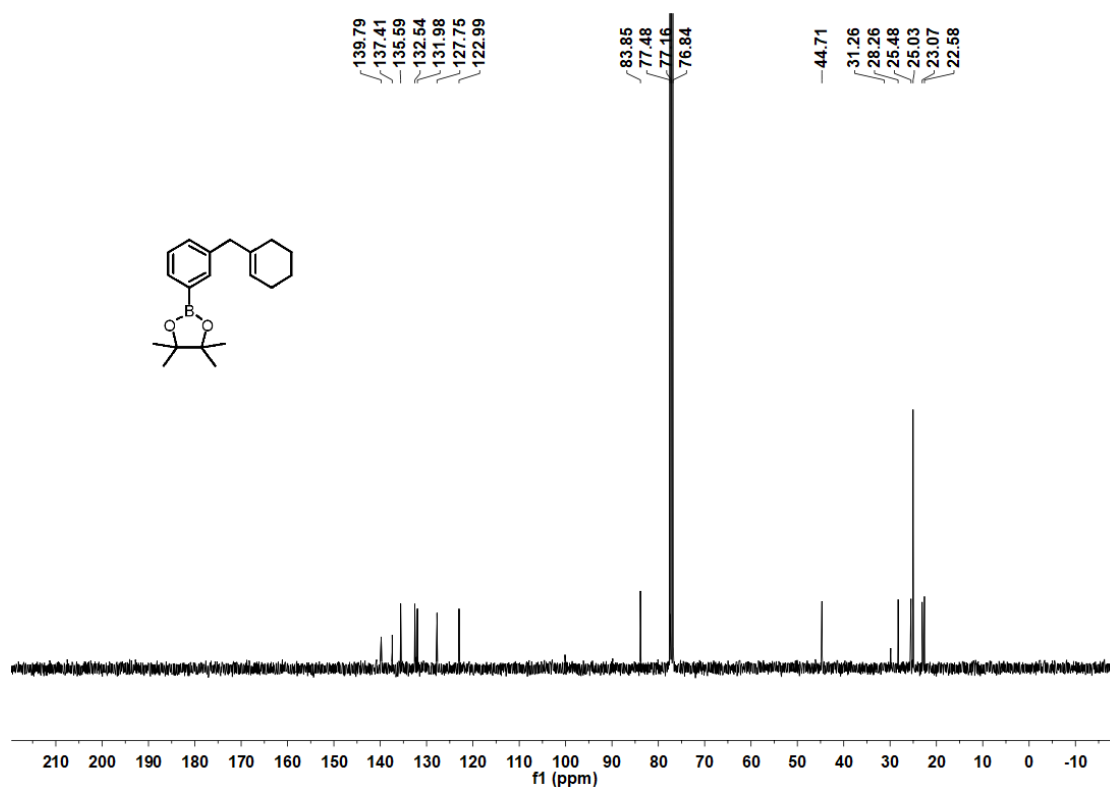

3t,  $^1\text{H}$  NMR (400 MHz,  $\text{CDCl}_3$ );  $^{13}\text{C}$  NMR (100 MHz,  $\text{CDCl}_3$ )

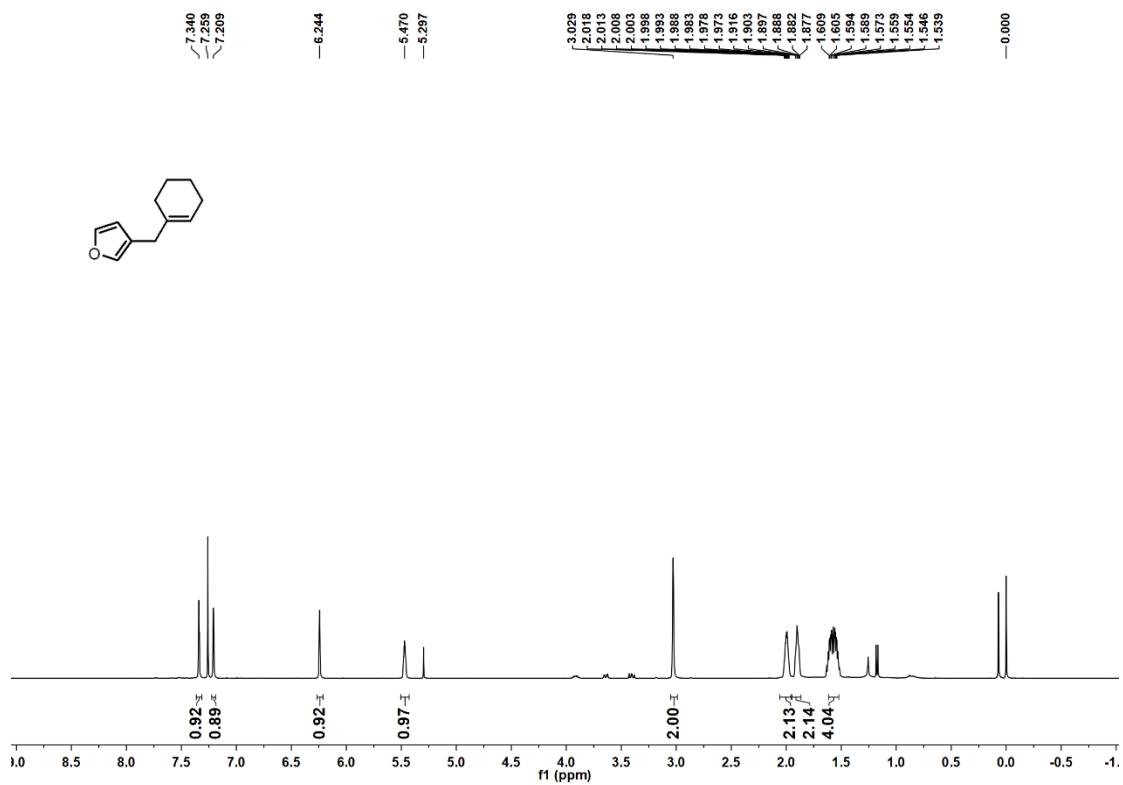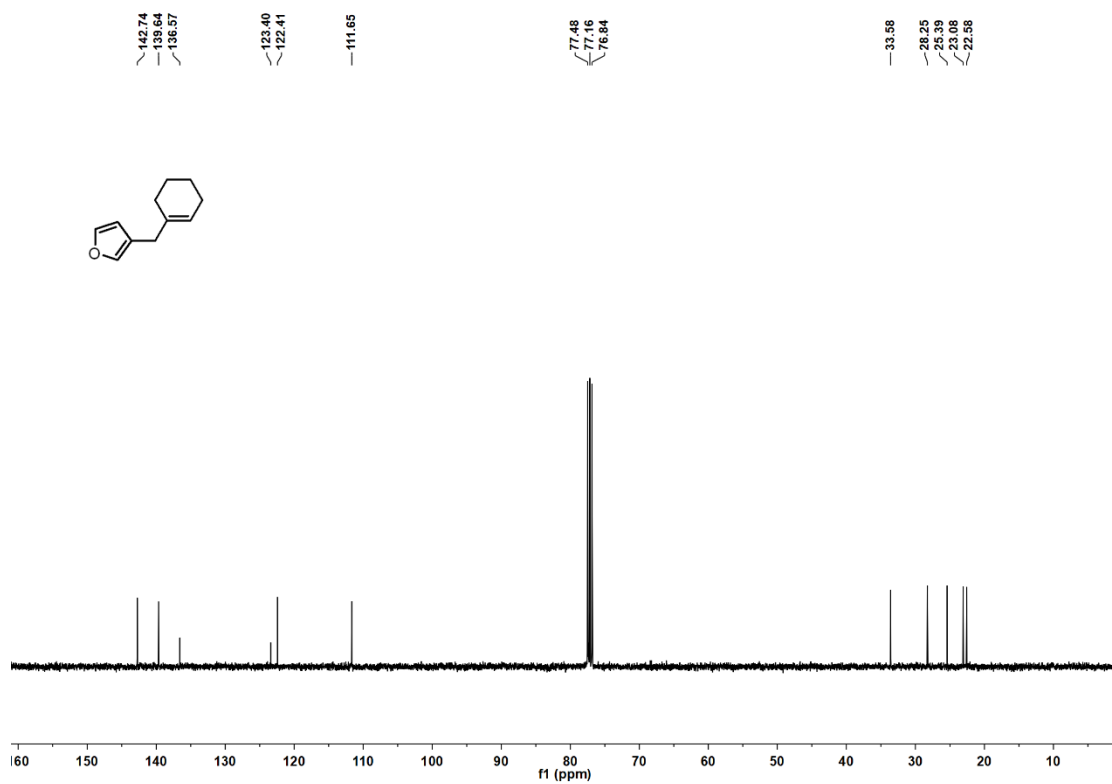

**3u,  $^1\text{H}$  NMR (400 MHz,  $\text{CDCl}_3$ );  $^{13}\text{C}$  NMR (100 MHz,  $\text{CDCl}_3$ )**

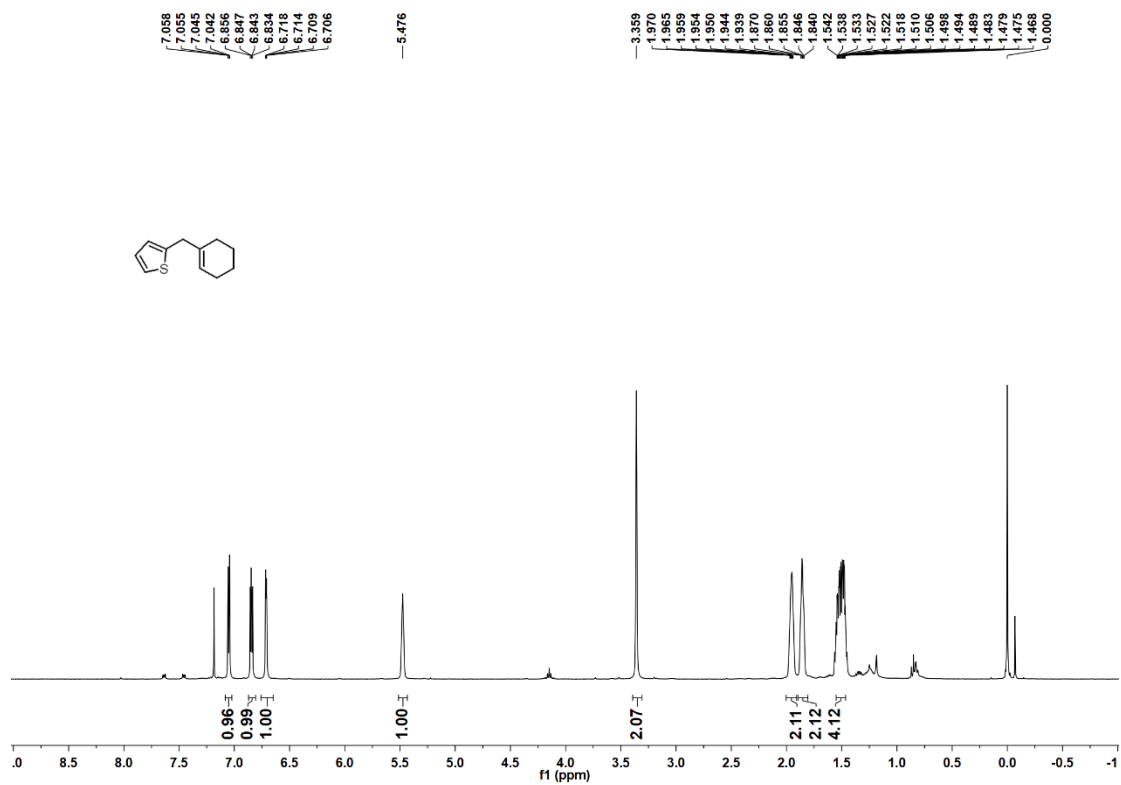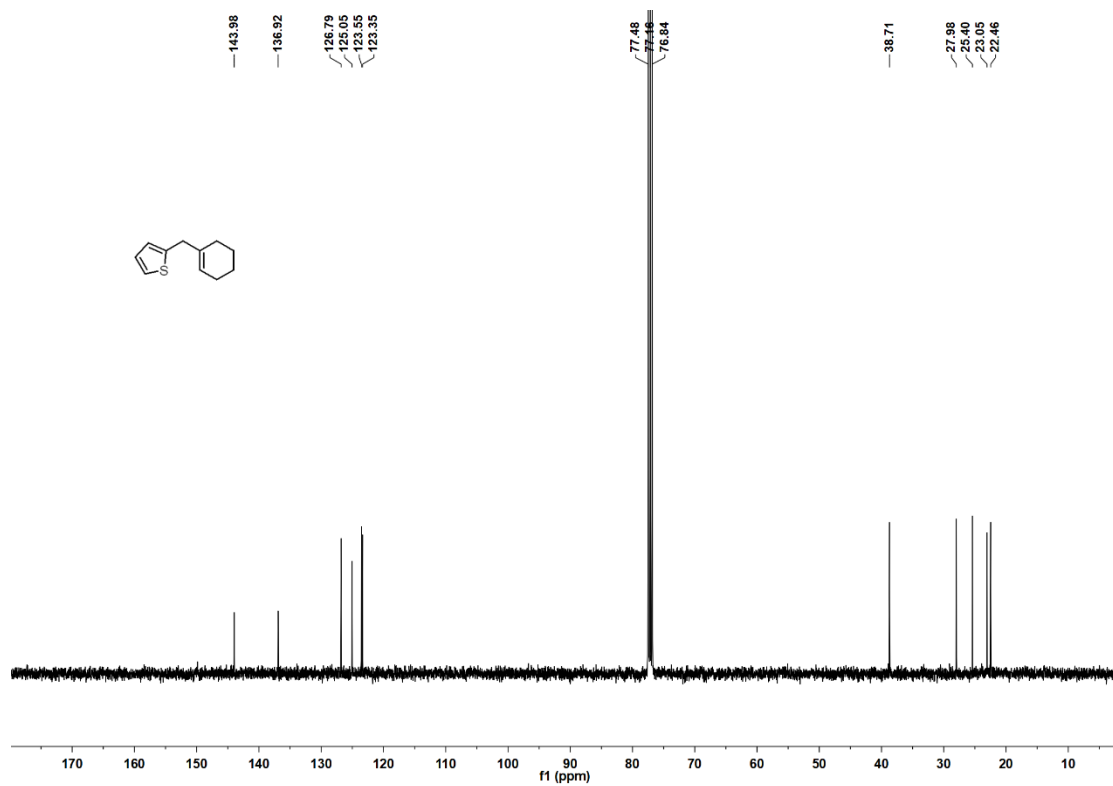

**3v**,  $^1\text{H}$  NMR (400 MHz,  $\text{CDCl}_3$ );  $^{13}\text{C}$  NMR (100 MHz,  $\text{CDCl}_3$ )

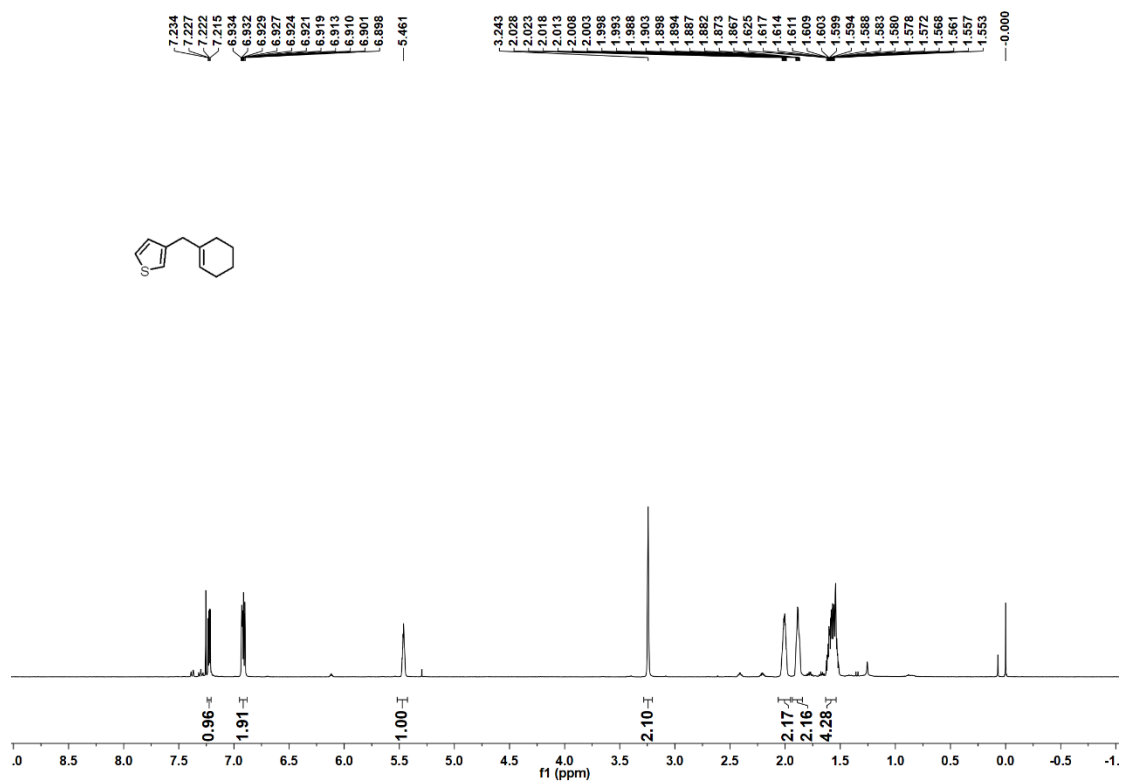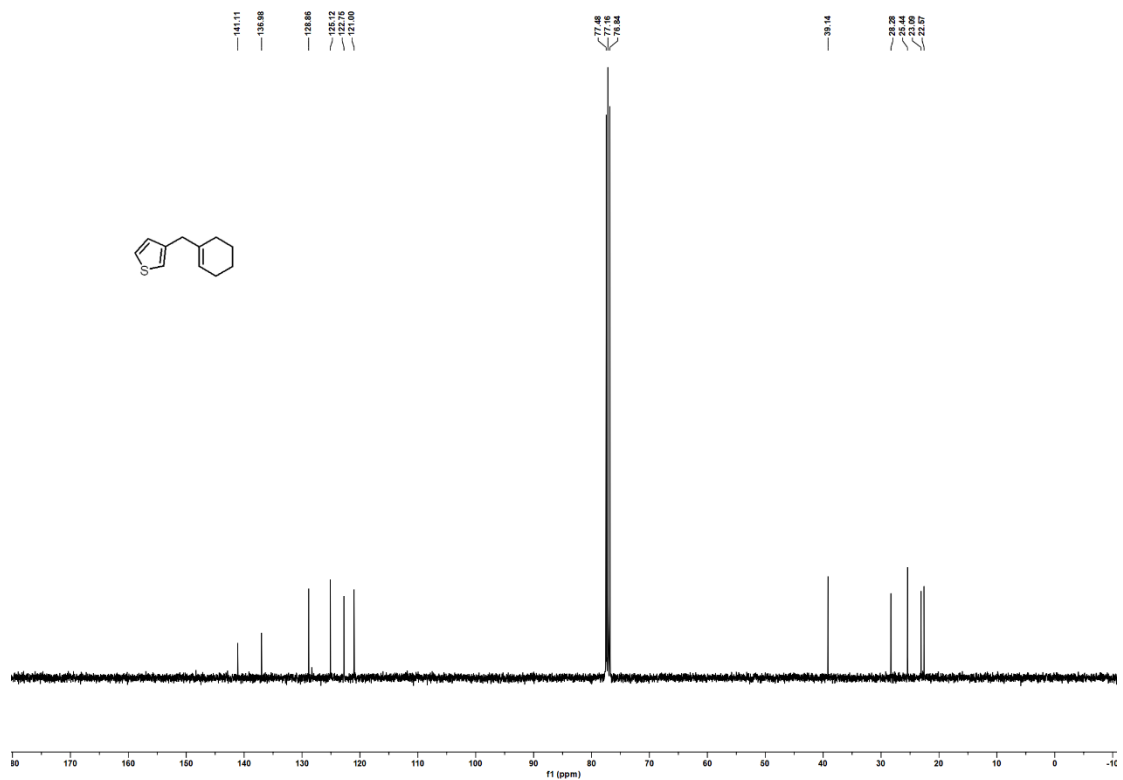

**3w,  $^1\text{H}$  NMR (400 MHz,  $\text{CDCl}_3$ );  $^{13}\text{C}$  NMR (100 MHz,  $\text{CDCl}_3$ )**

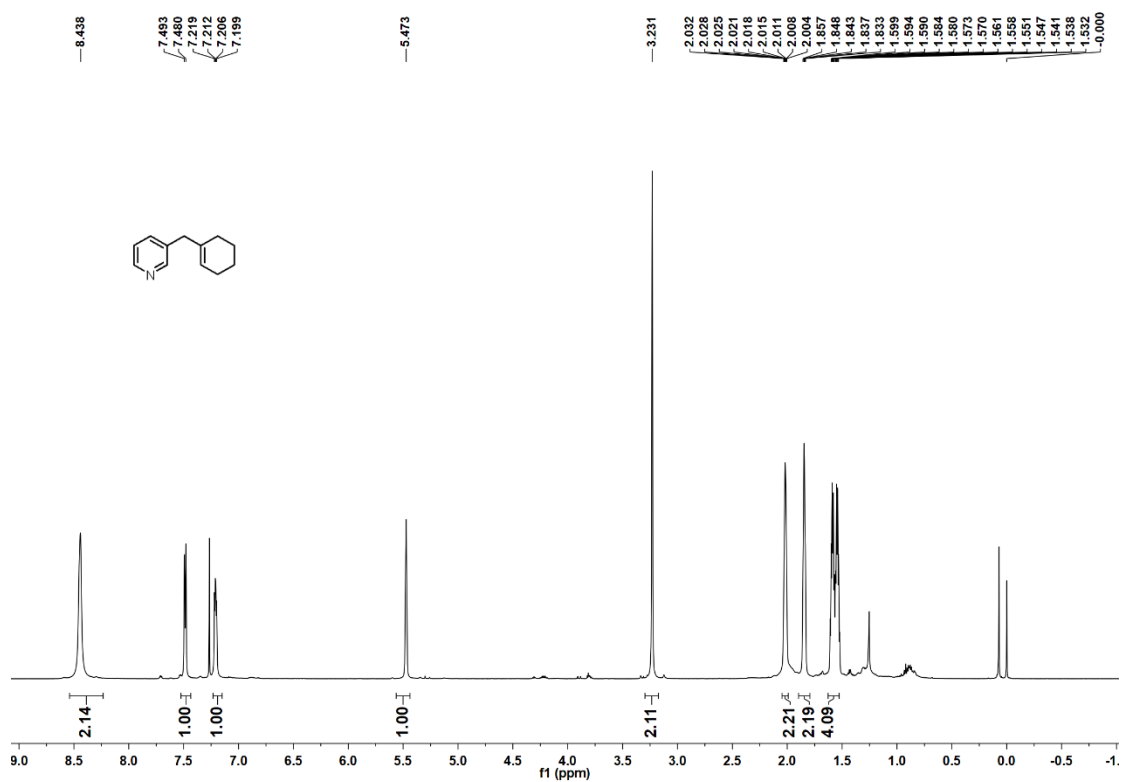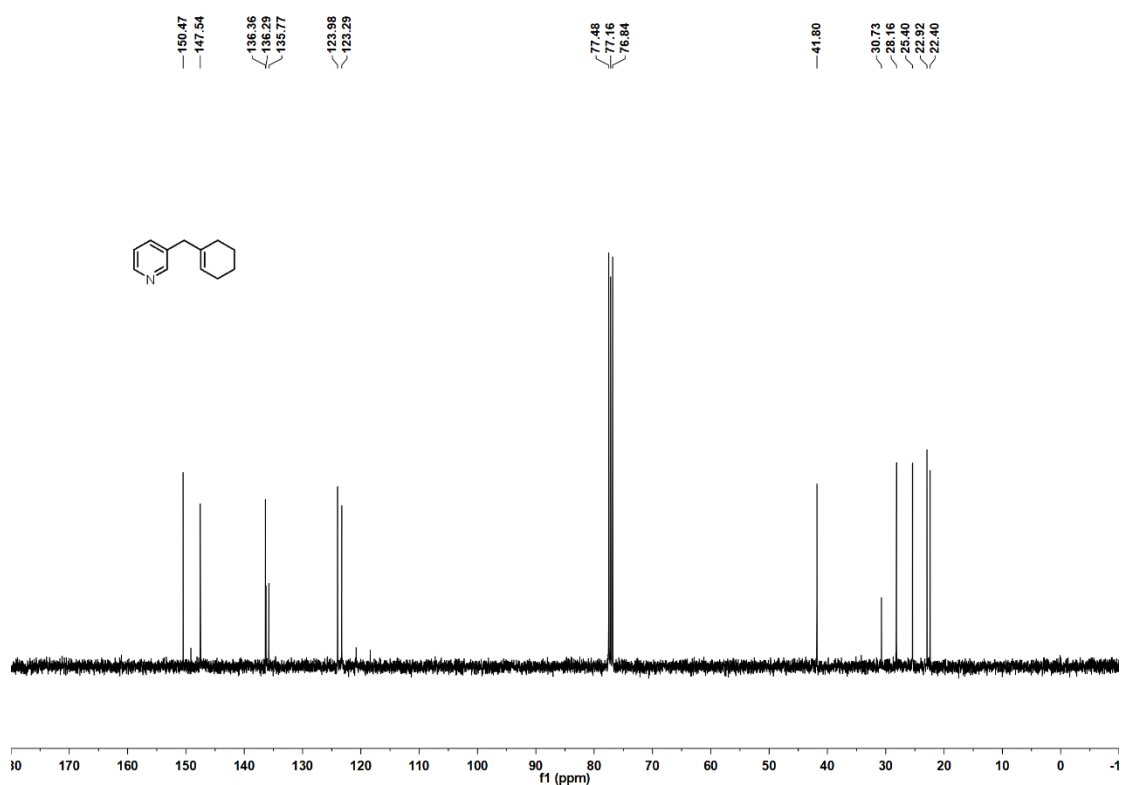



3x,  $^1\text{H}$  NMR (600 MHz,  $\text{CDCl}_3$ );  $^{13}\text{C}$  NMR (150 MHz,  $\text{CDCl}_3$ )

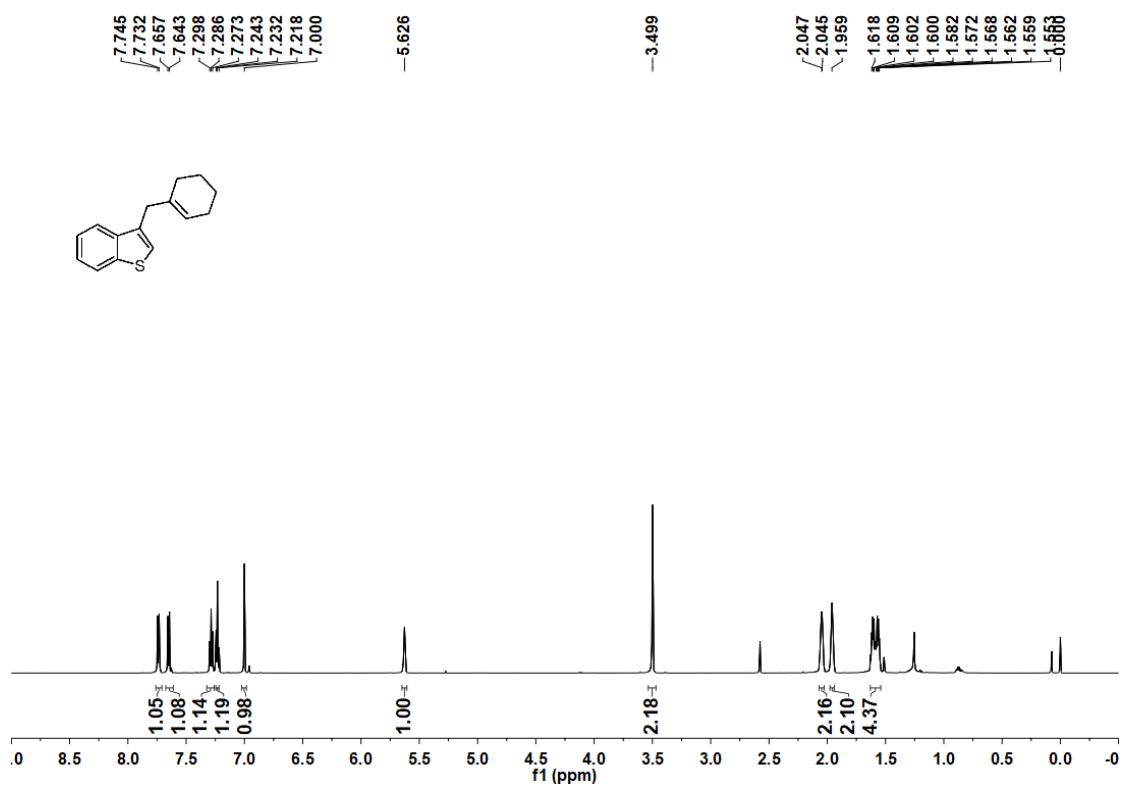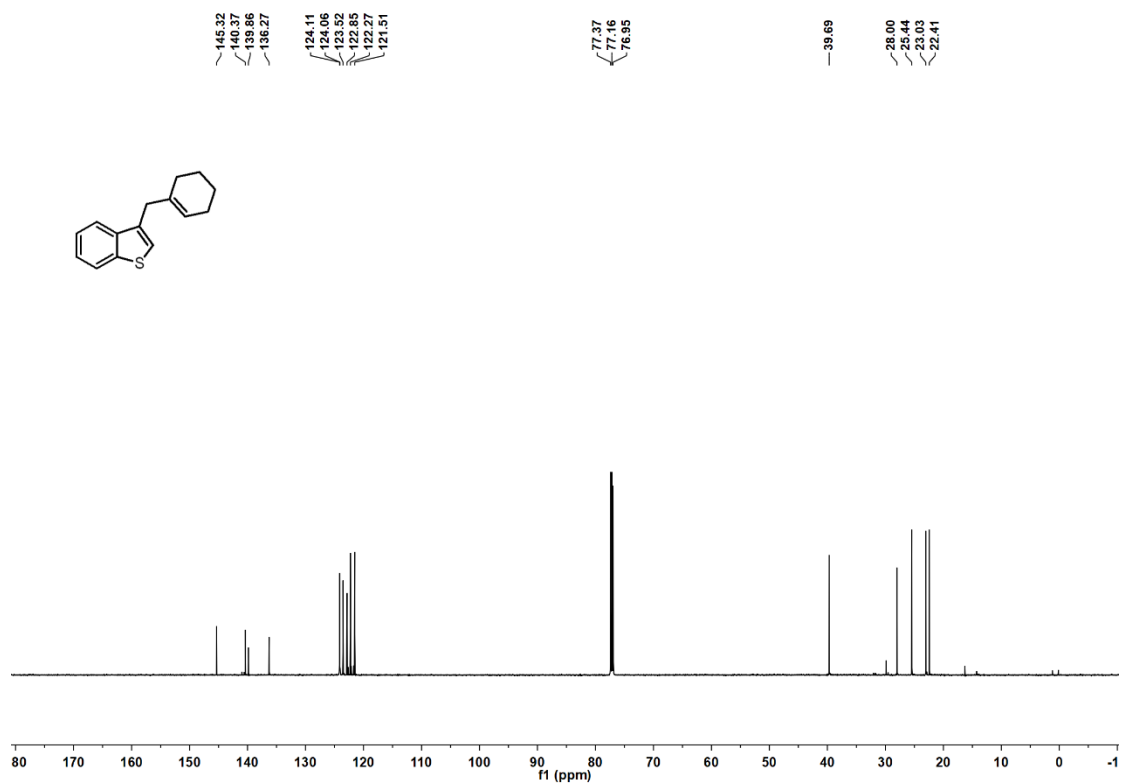

**3y,  $^1\text{H}$  NMR (400 MHz,  $\text{CDCl}_3$ );  $^{13}\text{C}$  NMR (100 MHz,  $\text{CDCl}_3$ )**

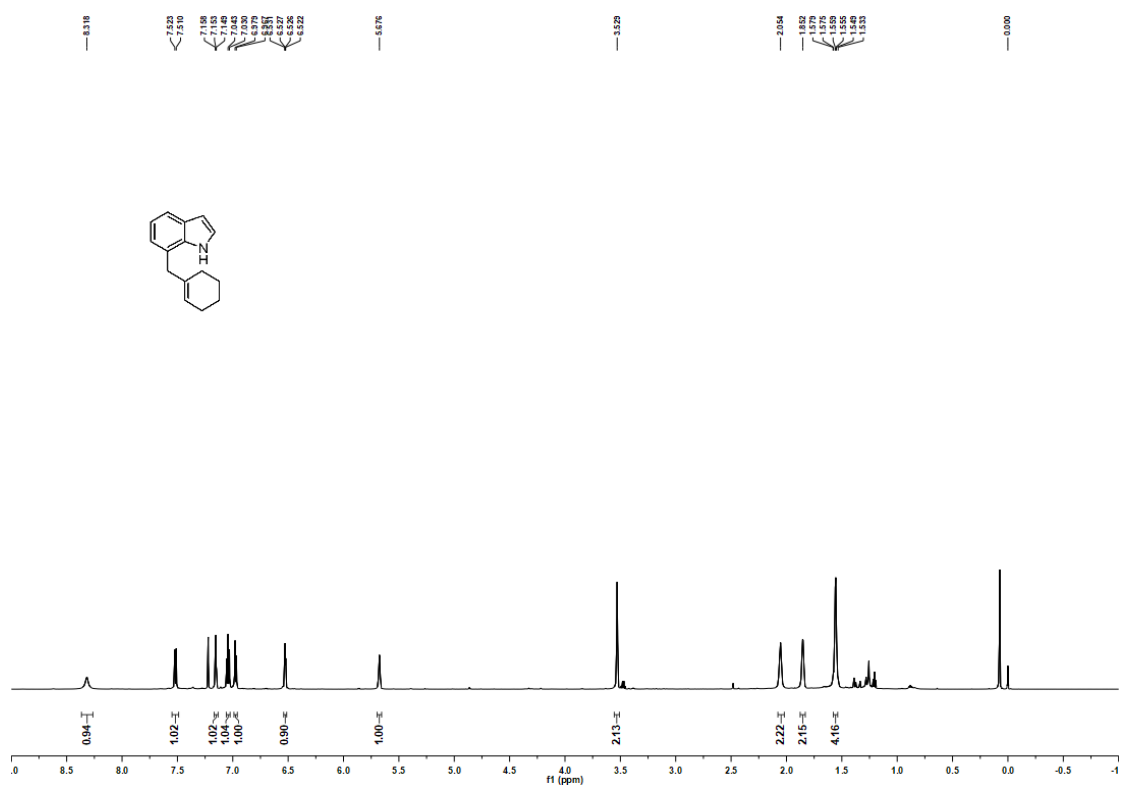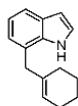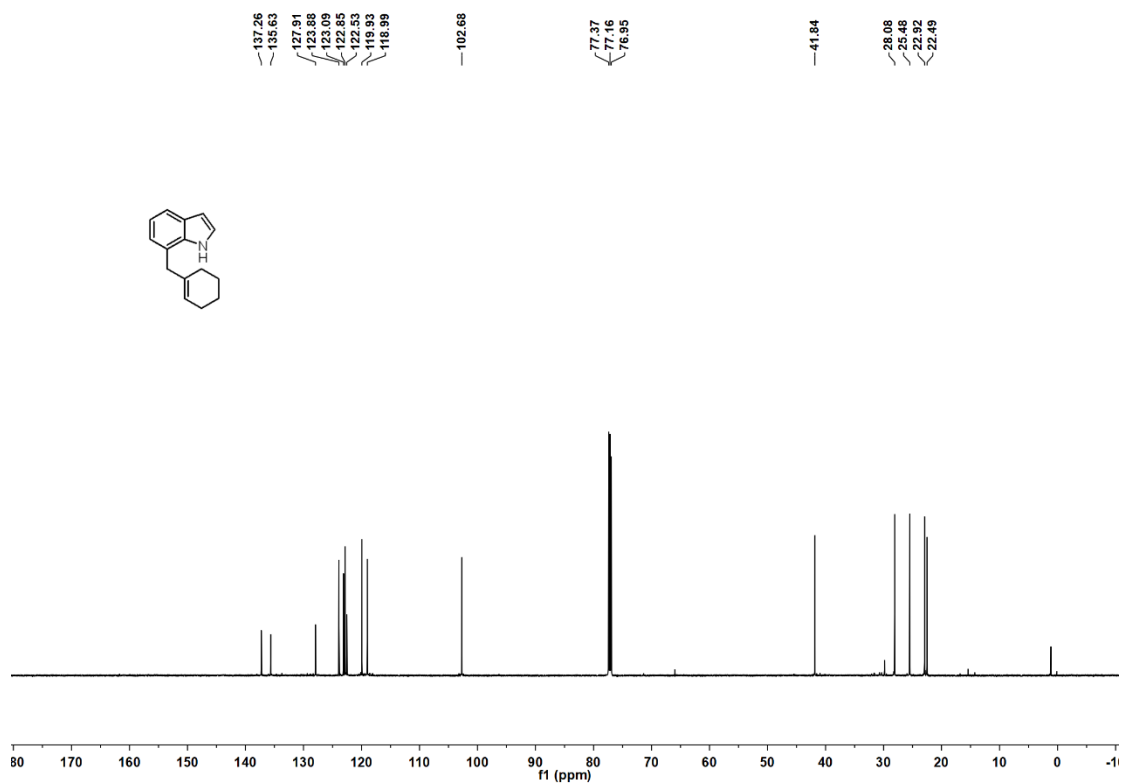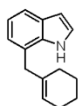

**3z,  $^1\text{H}$  NMR (600 MHz,  $\text{CDCl}_3$ );  $^{13}\text{C}$  NMR (150 MHz,  $\text{CDCl}_3$ )**

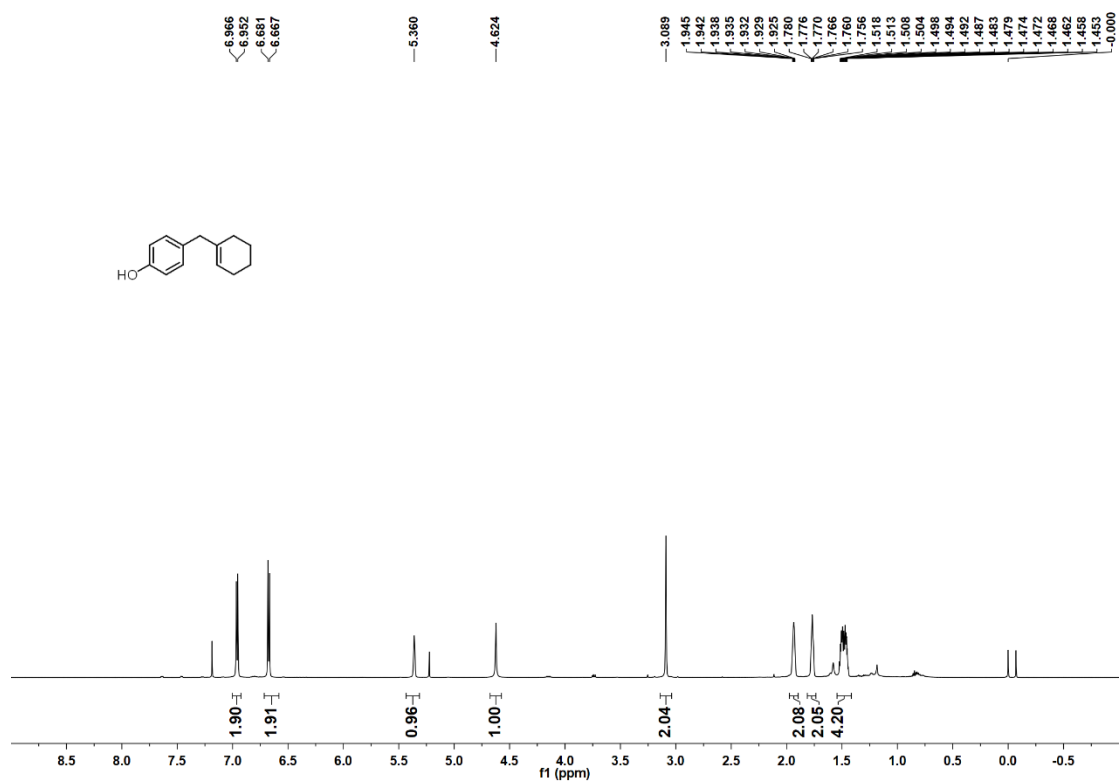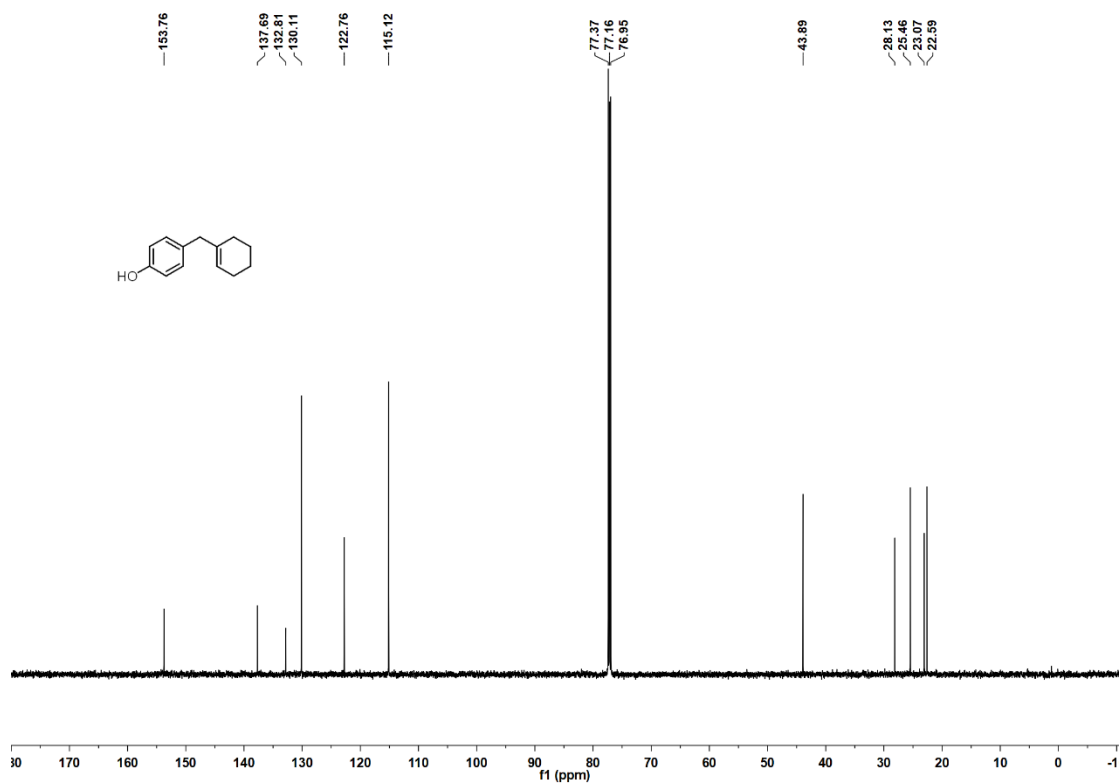

3aa,  $^1\text{H}$  NMR (600 MHz,  $\text{CDCl}_3$ );  $^{13}\text{C}$  NMR (150 MHz,  $\text{CDCl}_3$ )

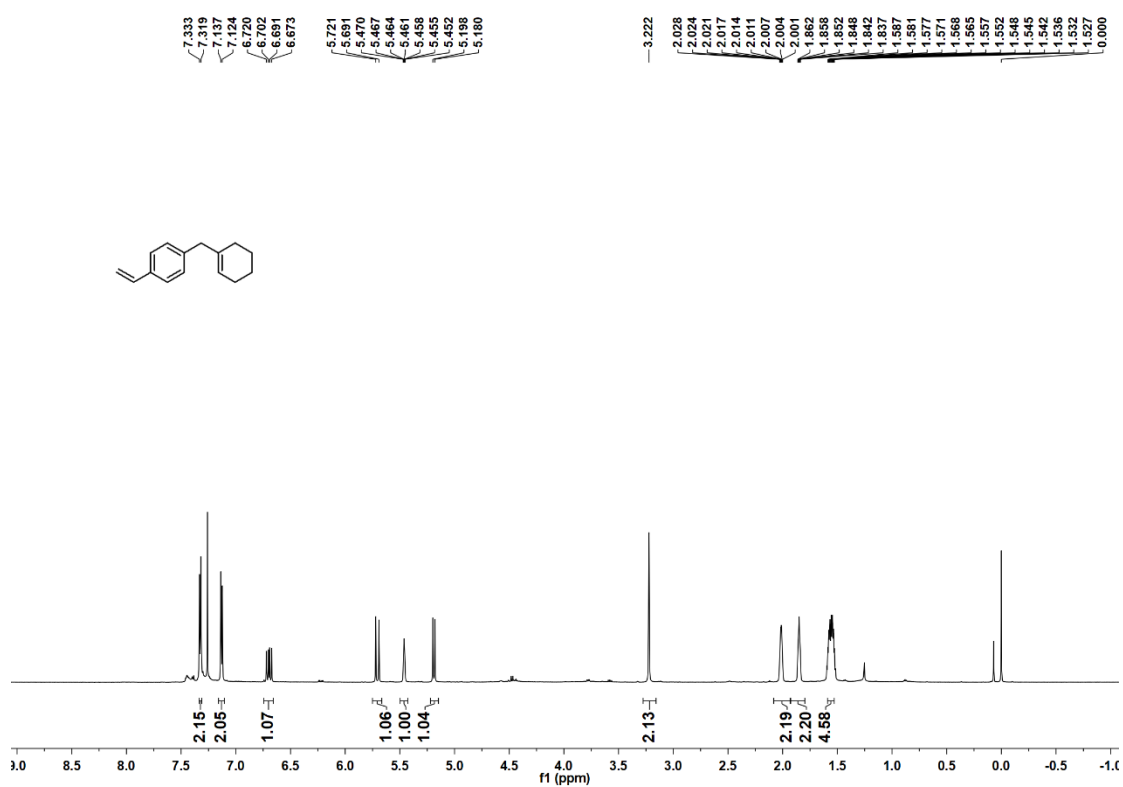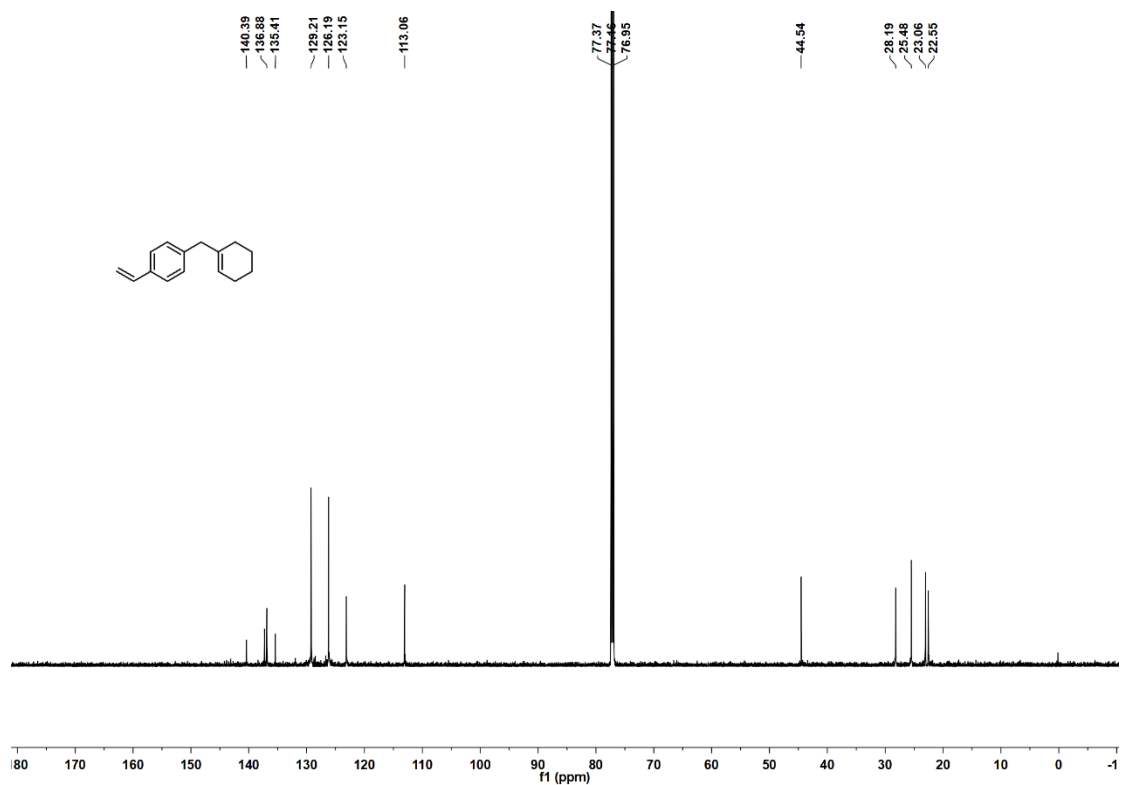

**3ab,  $^1\text{H}$  NMR (400 MHz,  $\text{CDCl}_3$ );  $^{13}\text{C}$  NMR (100 MHz,  $\text{CDCl}_3$ )**

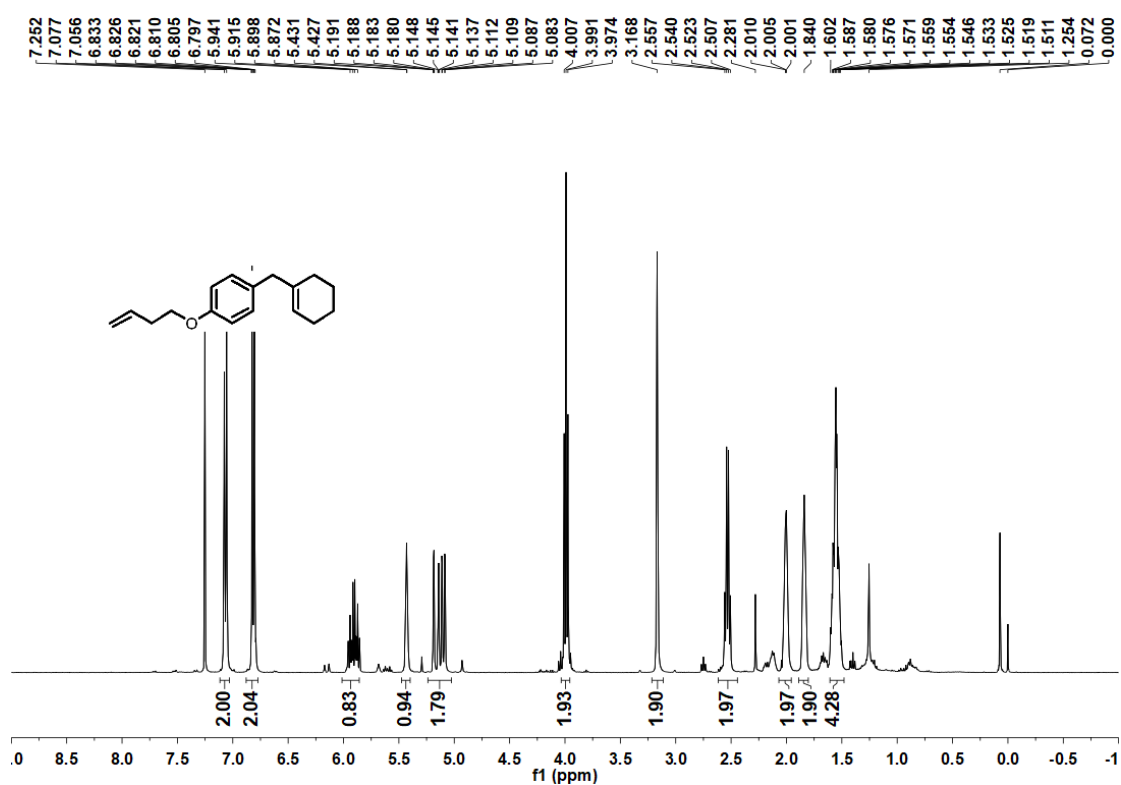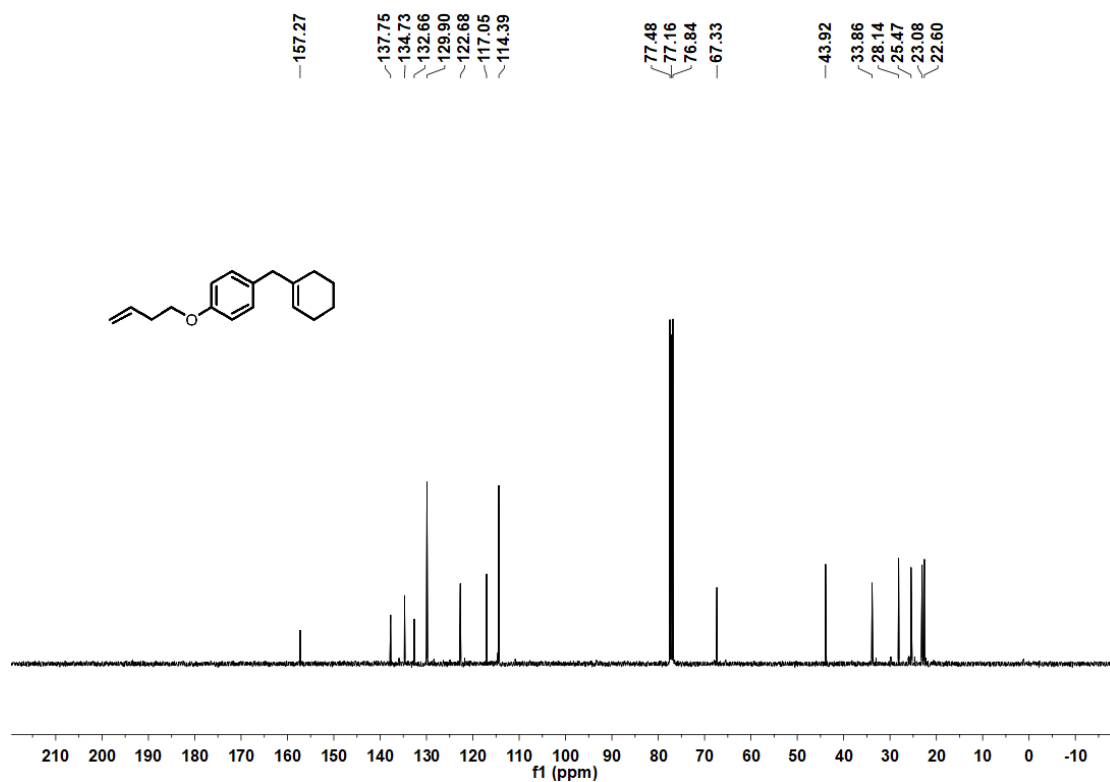

3ac,  $^1\text{H}$  NMR (600 MHz,  $\text{CDCl}_3$ );  $^{13}\text{C}$  NMR (150 MHz,  $\text{CDCl}_3$ )

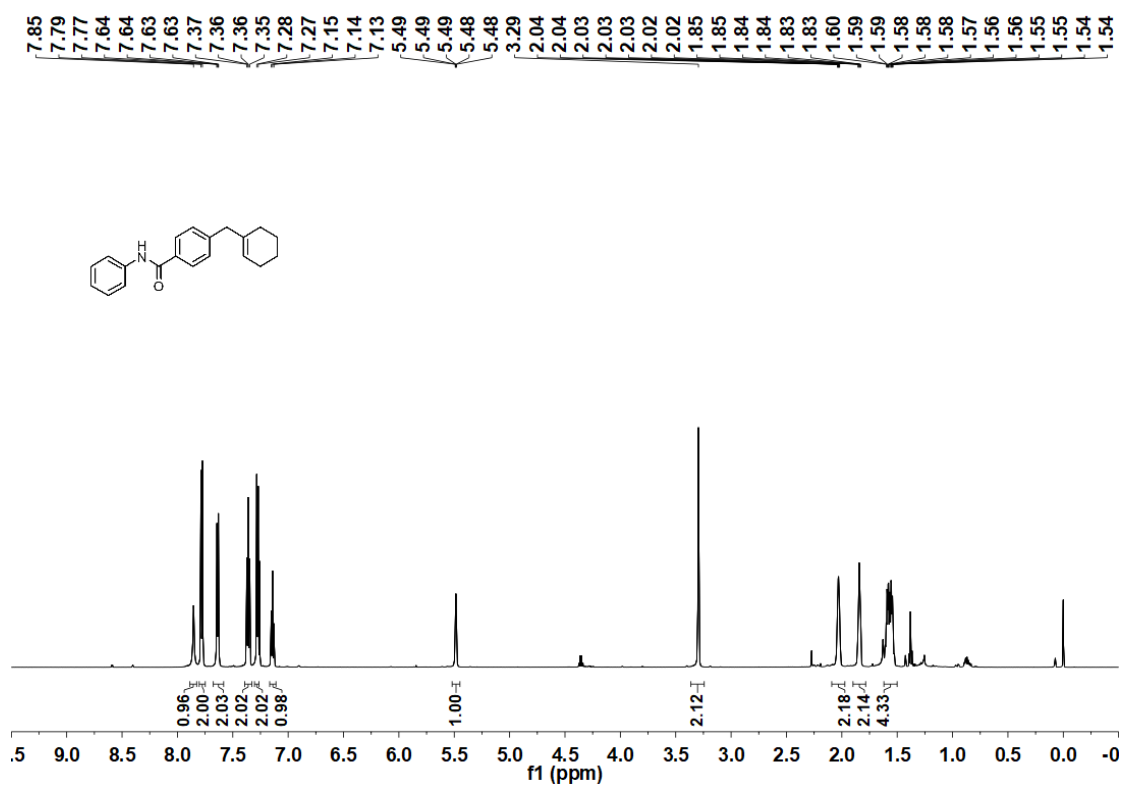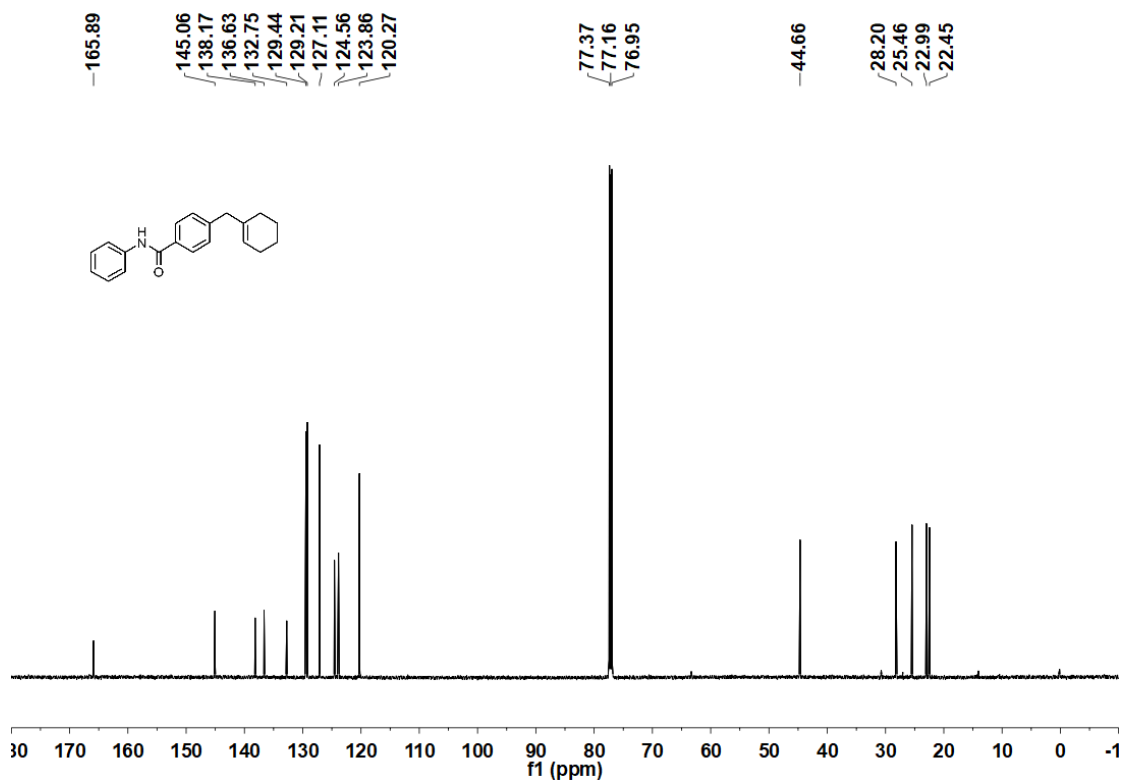

3ad,  $^1\text{H}$  NMR (400 MHz,  $\text{CDCl}_3$ );  $^{13}\text{C}$  NMR (100 MHz,  $\text{CDCl}_3$ )

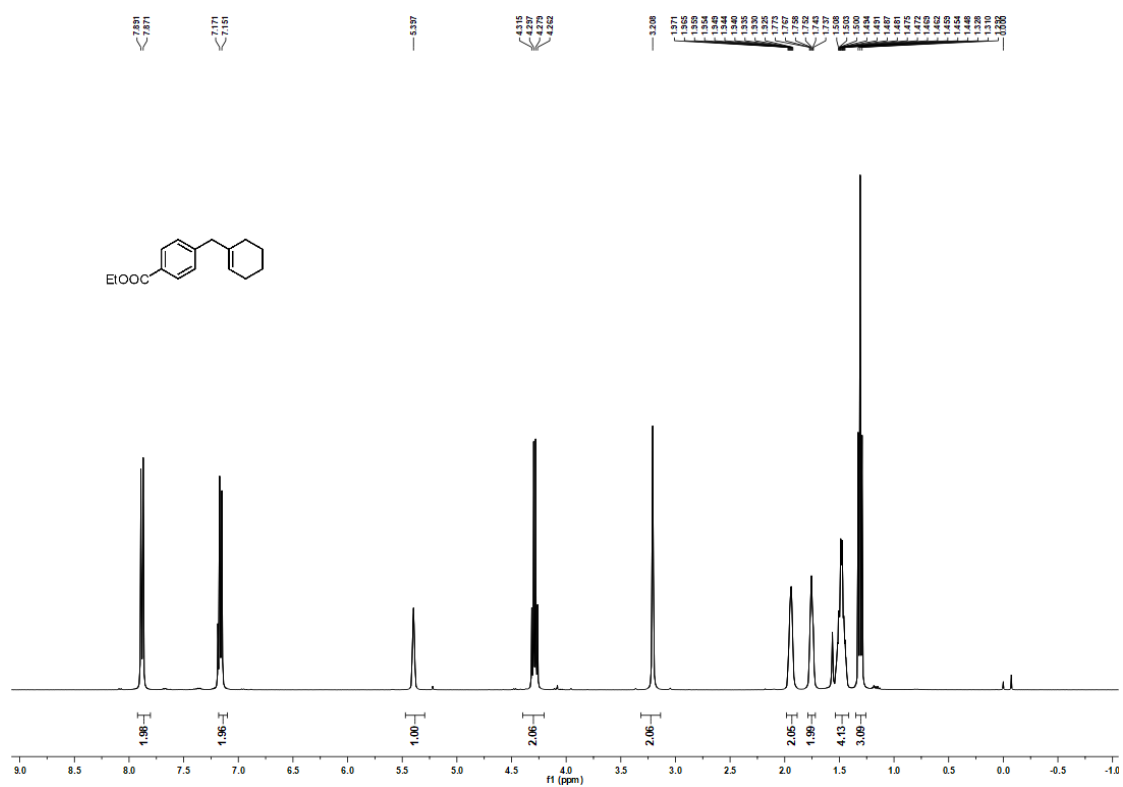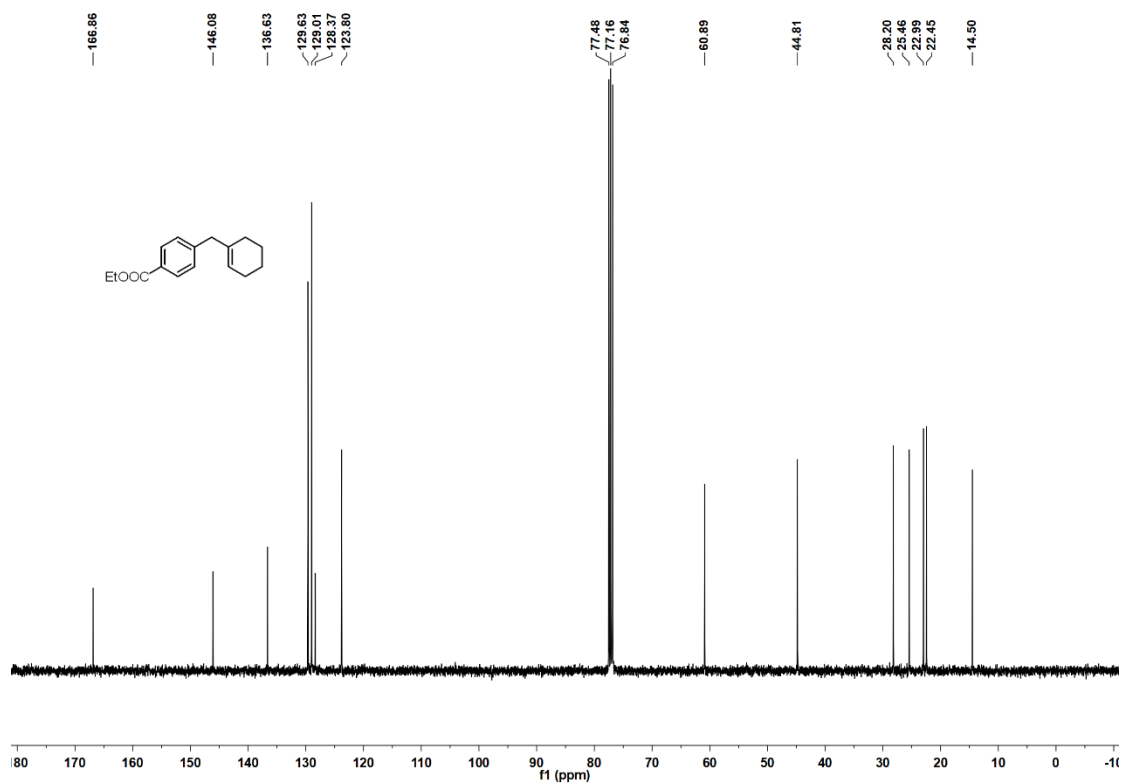

**3ae**,  $^1\text{H}$  NMR (400 MHz,  $\text{CDCl}_3$ );  $^{13}\text{C}$  NMR (100 MHz,  $\text{CDCl}_3$ )

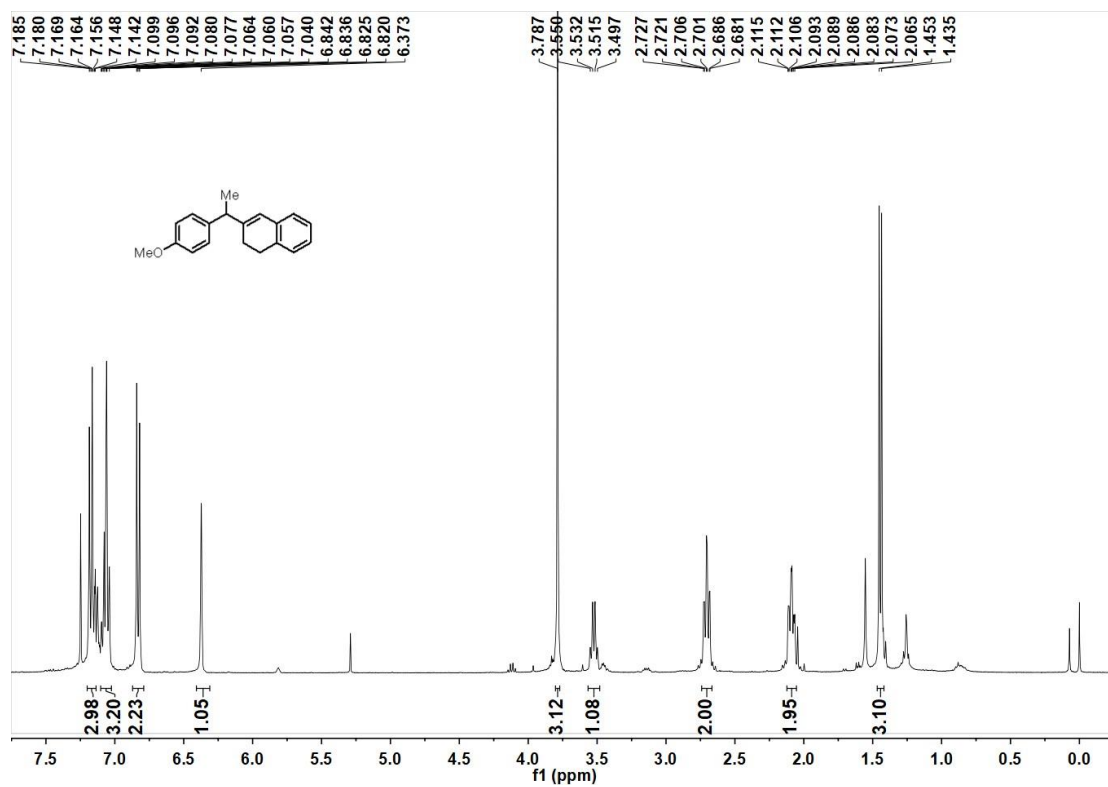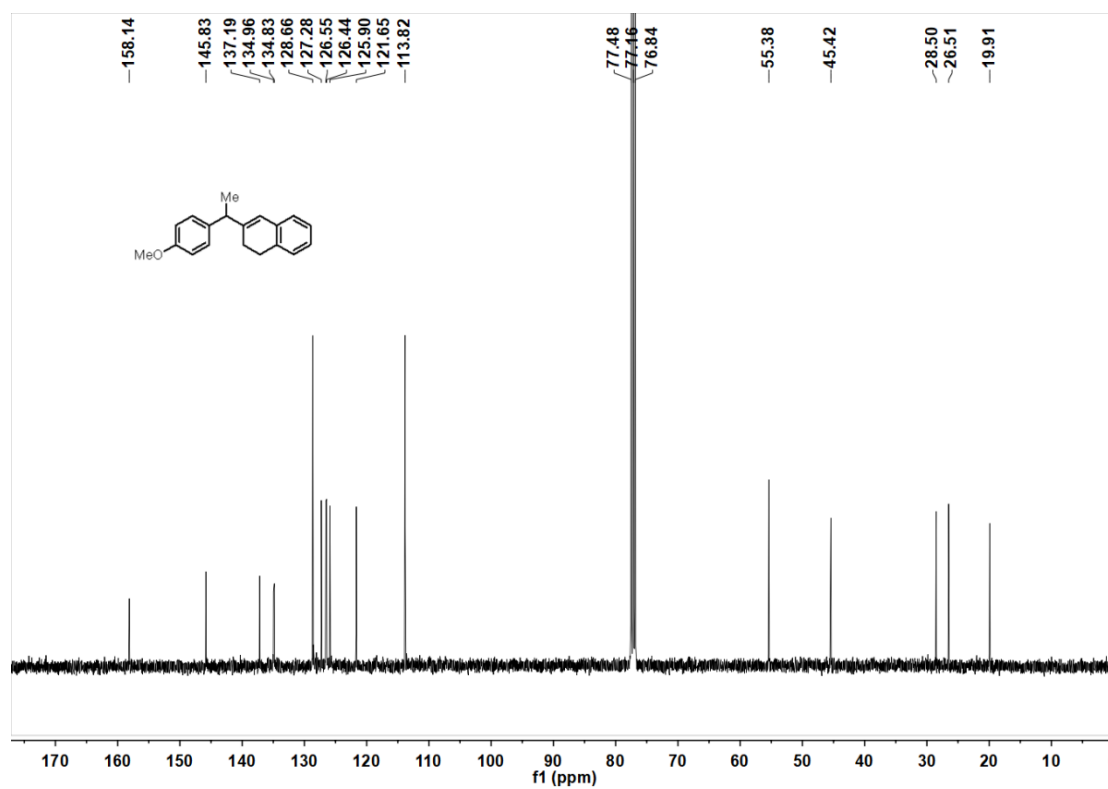



**3af,  $^1\text{H}$  NMR (600 MHz,  $\text{CDCl}_3$ );  $^{13}\text{C}$  NMR (150 MHz,  $\text{CDCl}_3$ )**

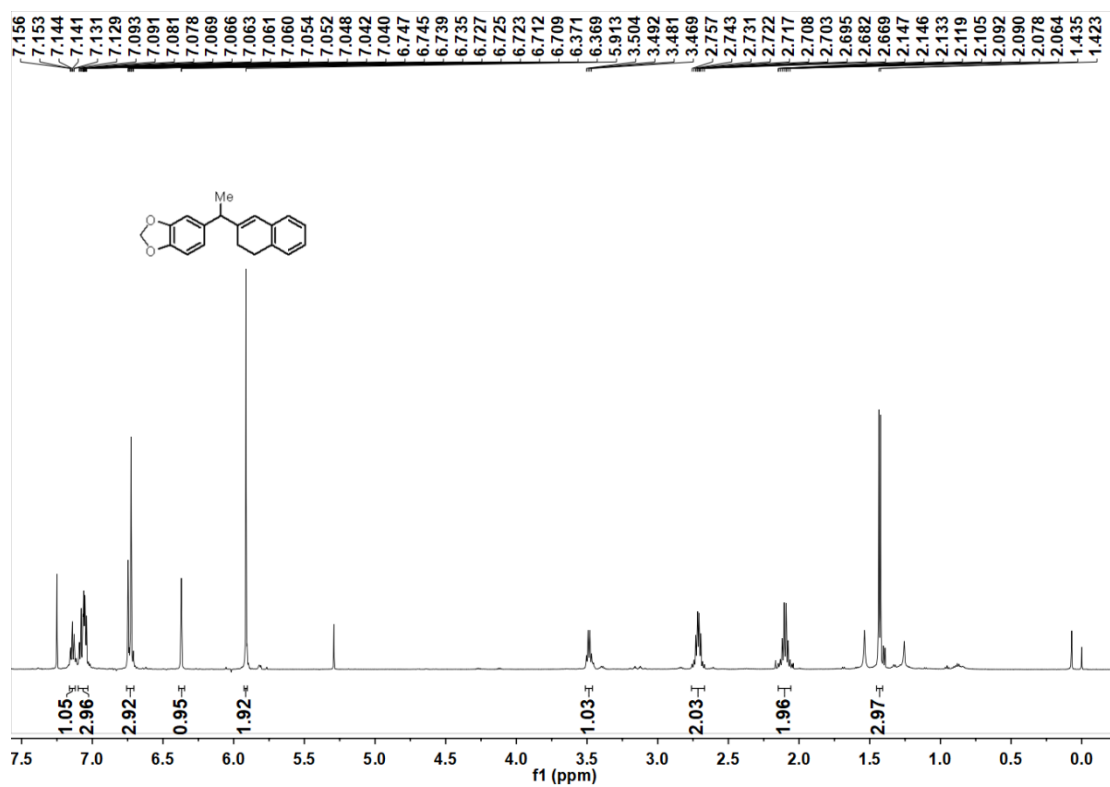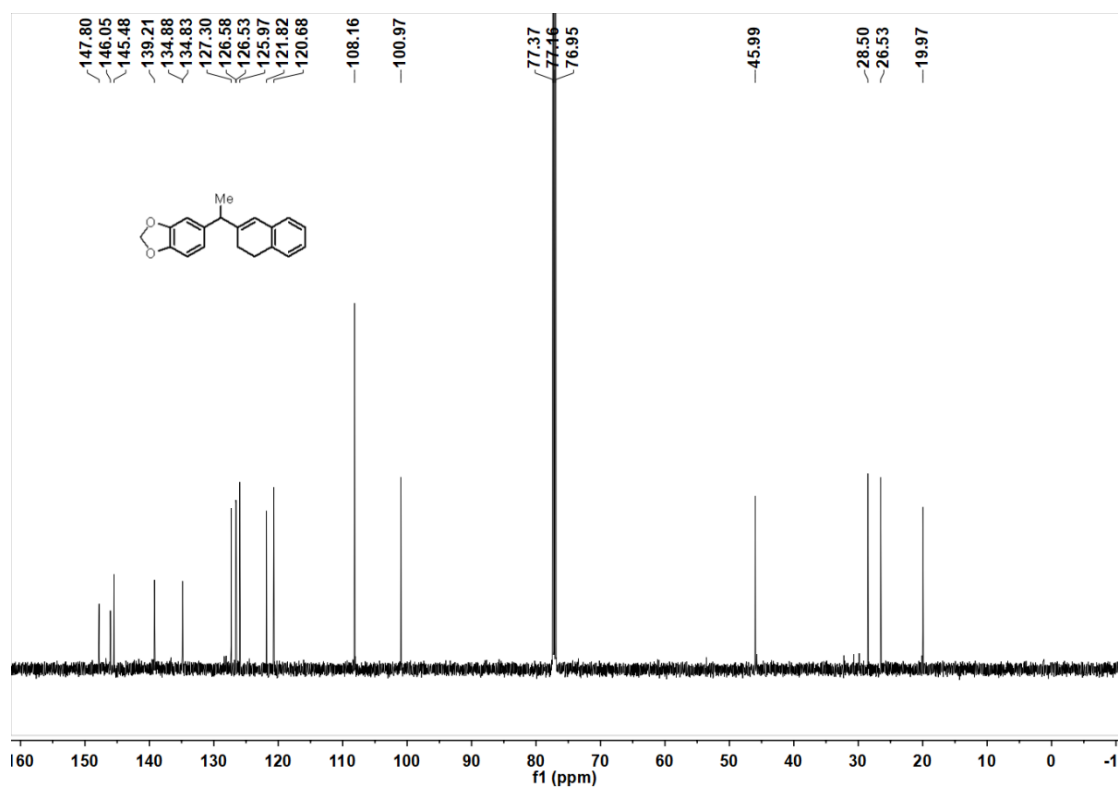

**3ag,  $^1\text{H}$  NMR (600 MHz,  $\text{CDCl}_3$ );  $^{13}\text{C}$  NMR (150 MHz,  $\text{CDCl}_3$ )**

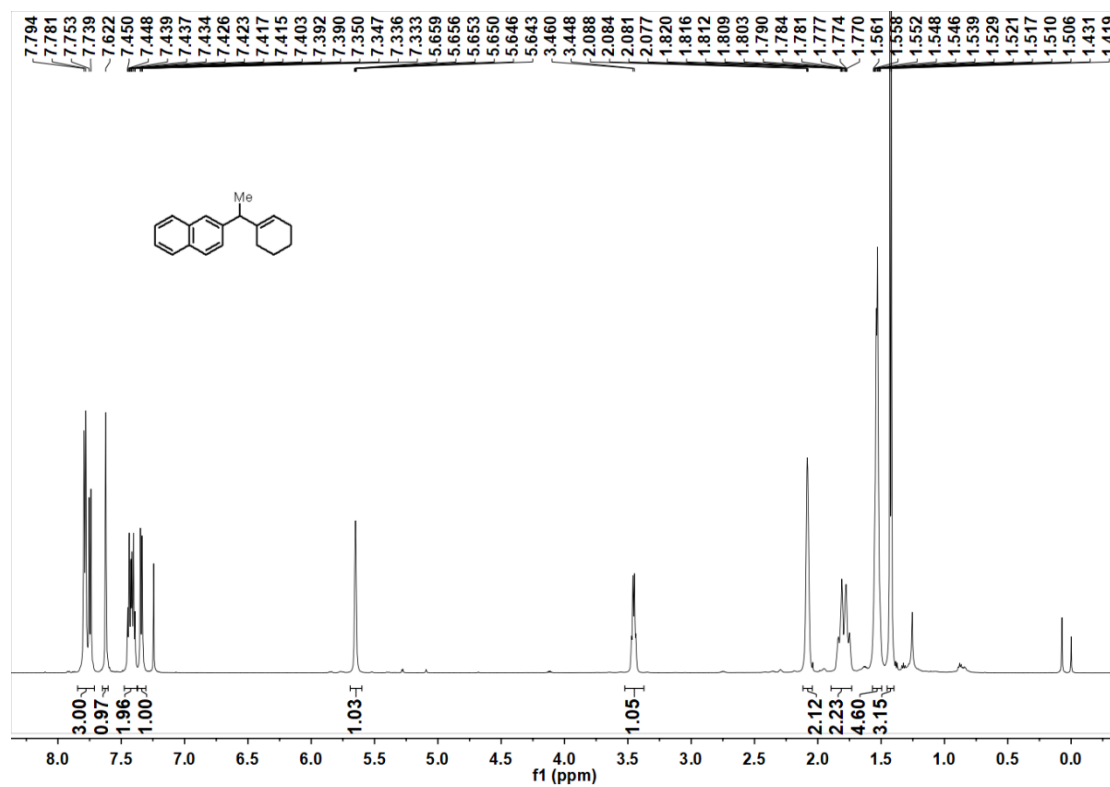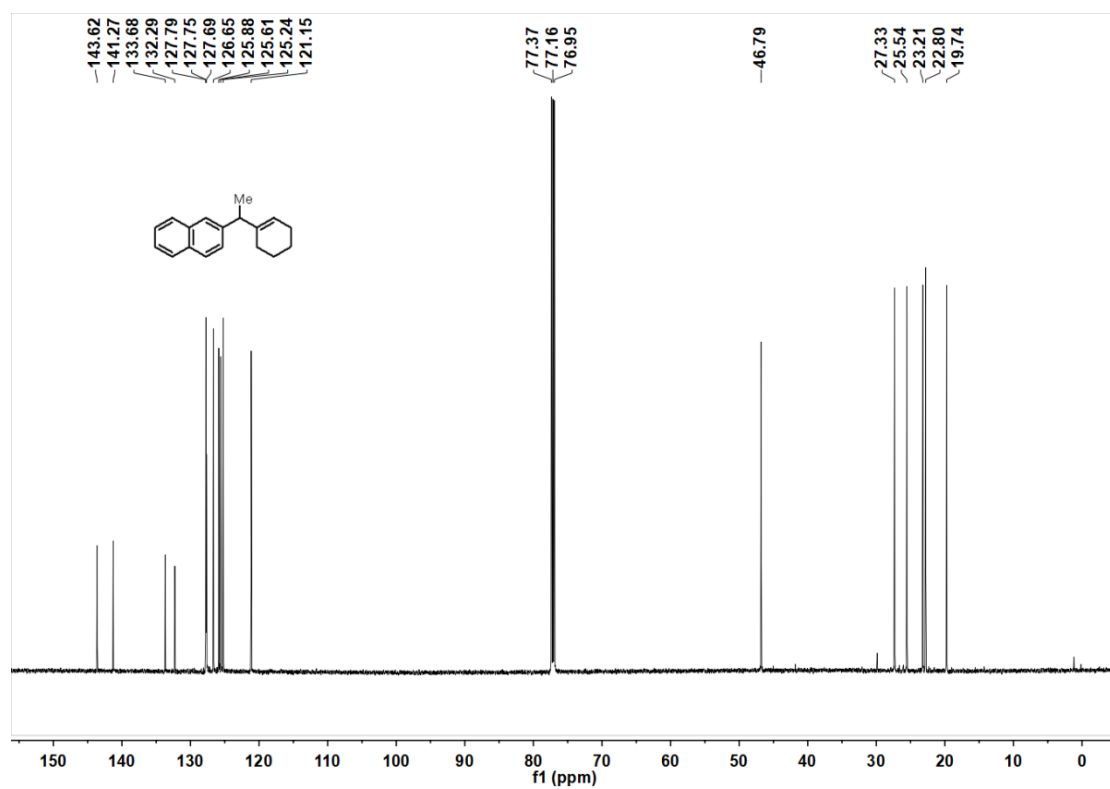

**3ah,  $^1\text{H}$  NMR (600 MHz,  $\text{CDCl}_3$ );  $^{13}\text{C}$  NMR (150 MHz,  $\text{CDCl}_3$ )**

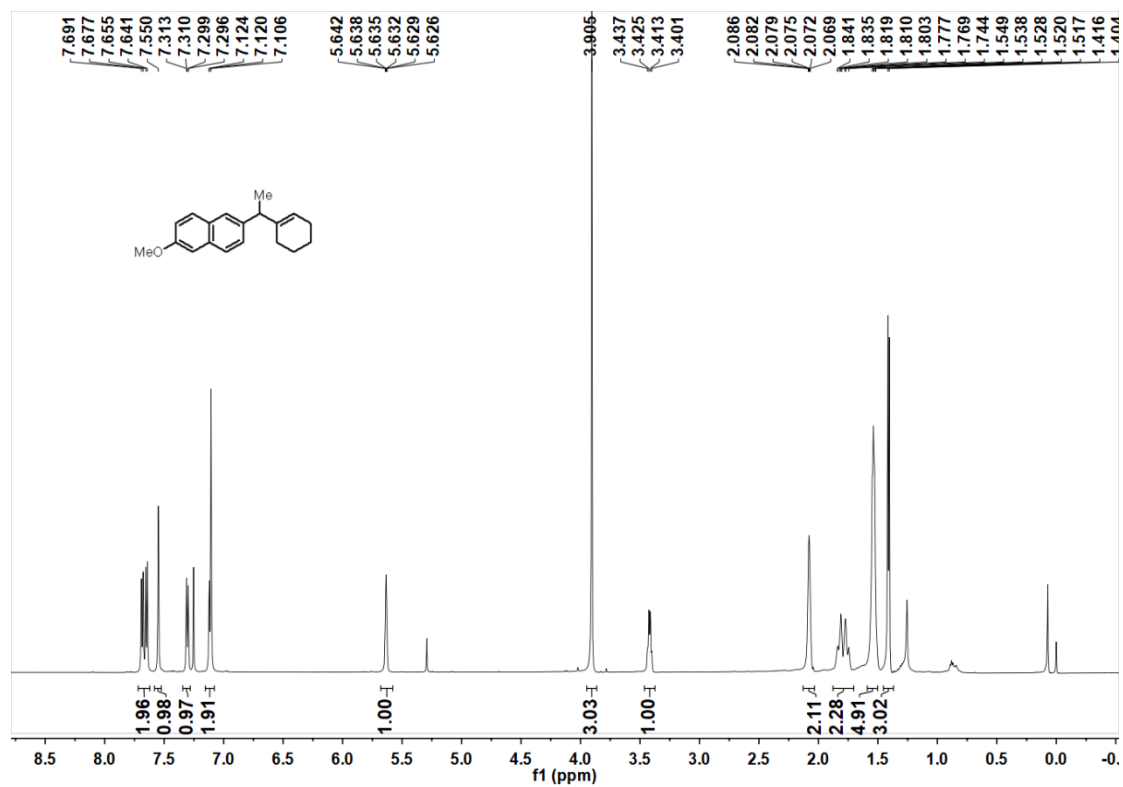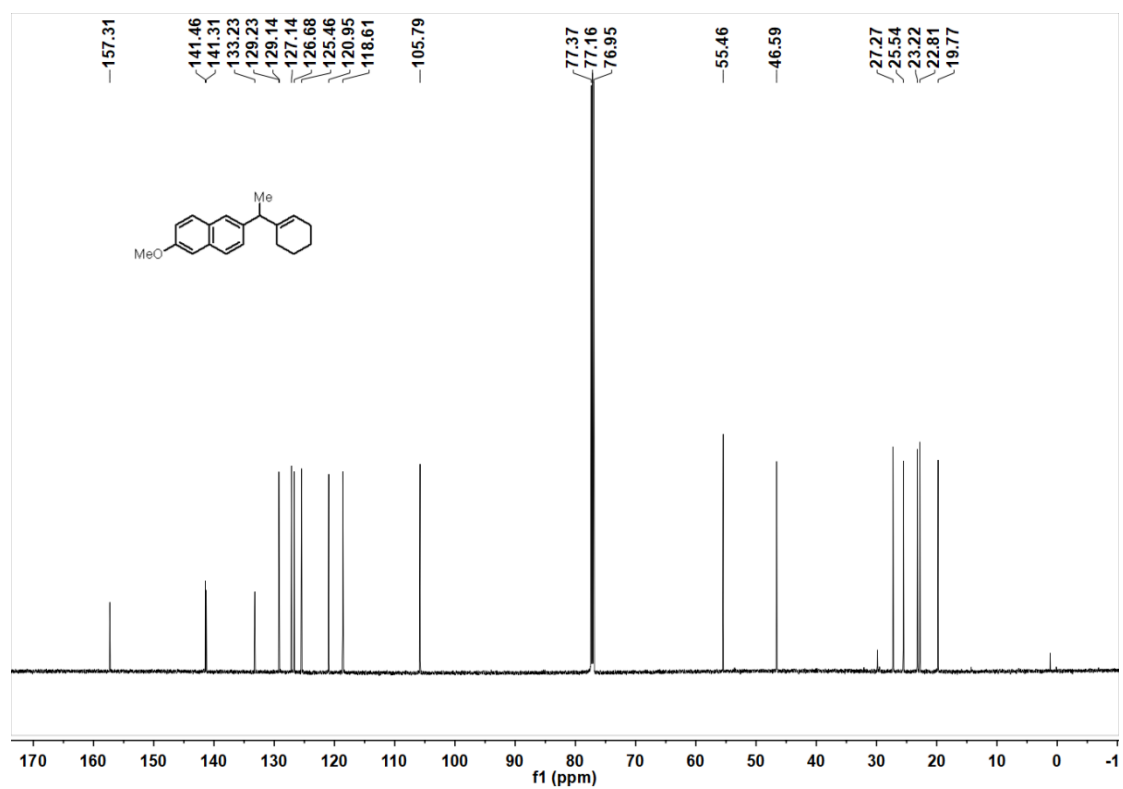

3ai,  $^1\text{H}$  NMR (400 MHz,  $\text{CDCl}_3$ );  $^{13}\text{C}$  NMR (100 MHz,  $\text{CDCl}_3$ )

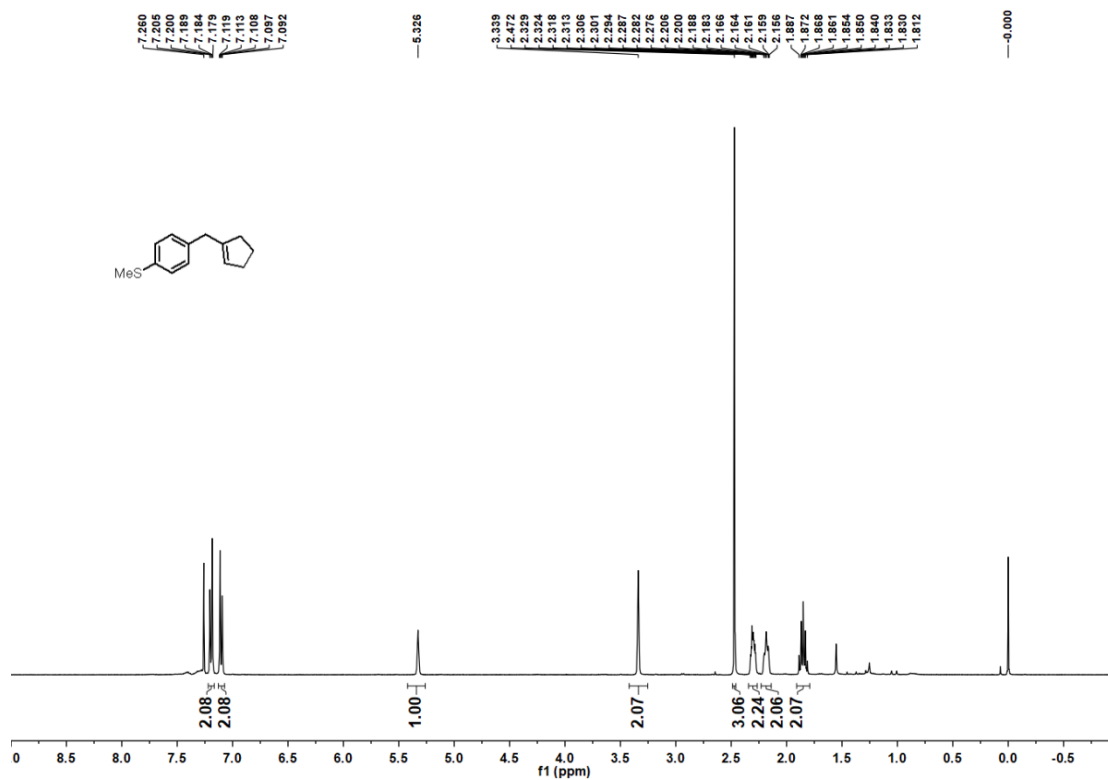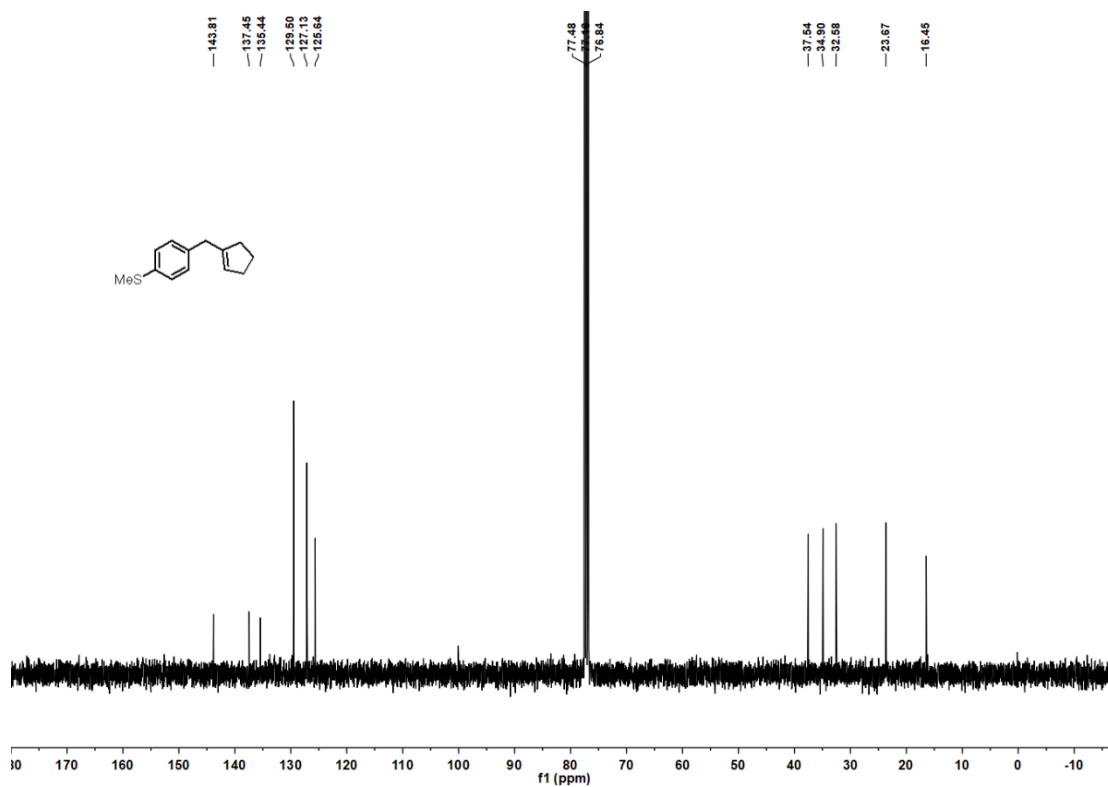

**3aj,  $^1\text{H}$  NMR (400 MHz,  $\text{CDCl}_3$ );  $^{13}\text{C}$  NMR (100 MHz,  $\text{CDCl}_3$ )**

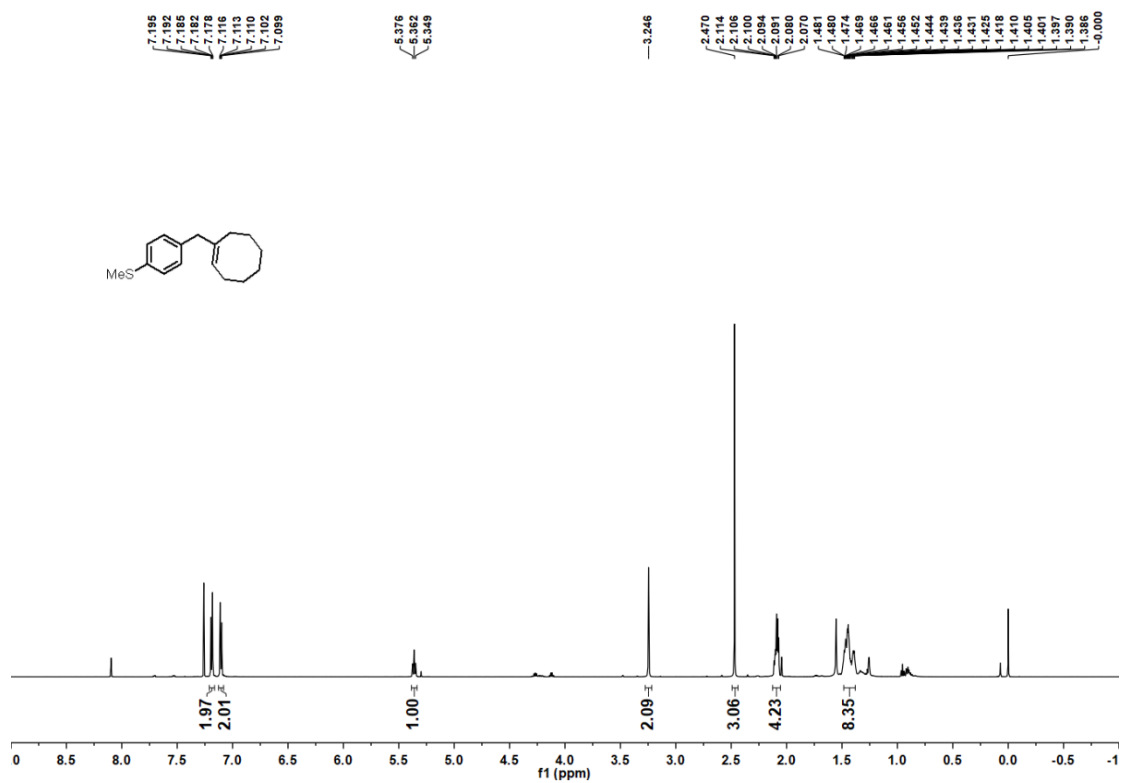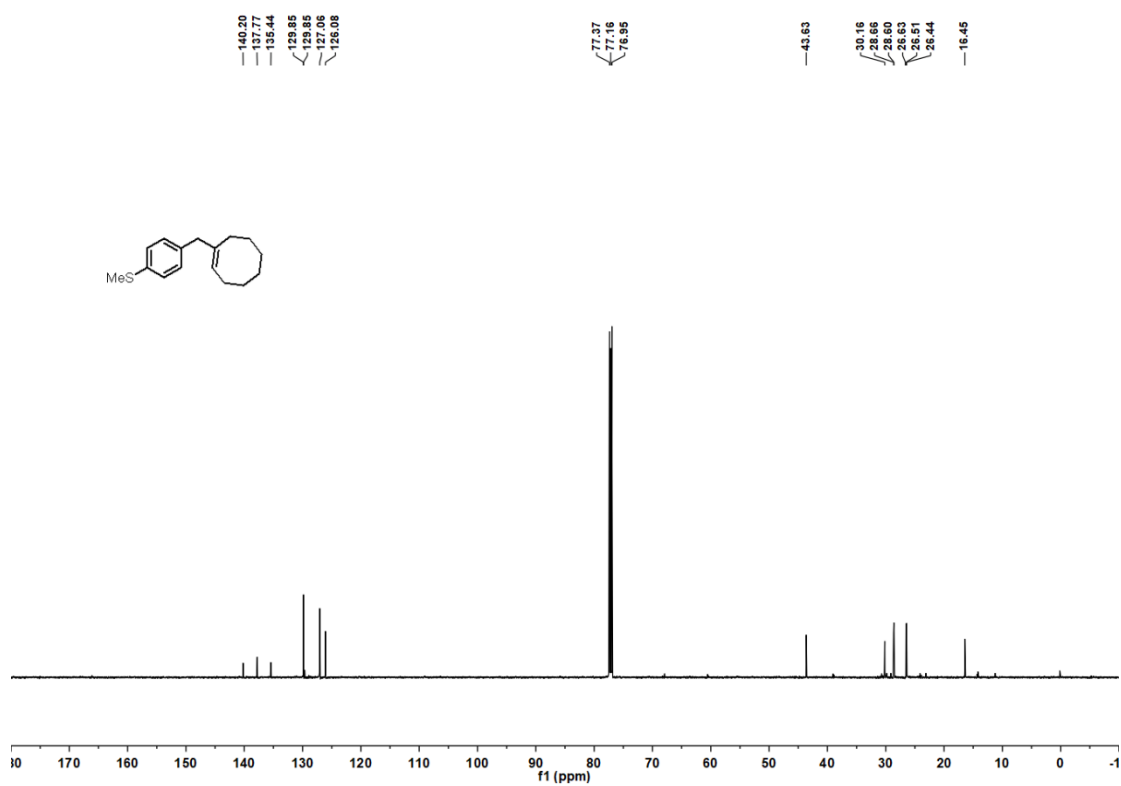

**3ak,  $^1\text{H}$  NMR (400 MHz,  $\text{CDCl}_3$ );  $^{13}\text{C}$  NMR (100 MHz,  $\text{CDCl}_3$ )**

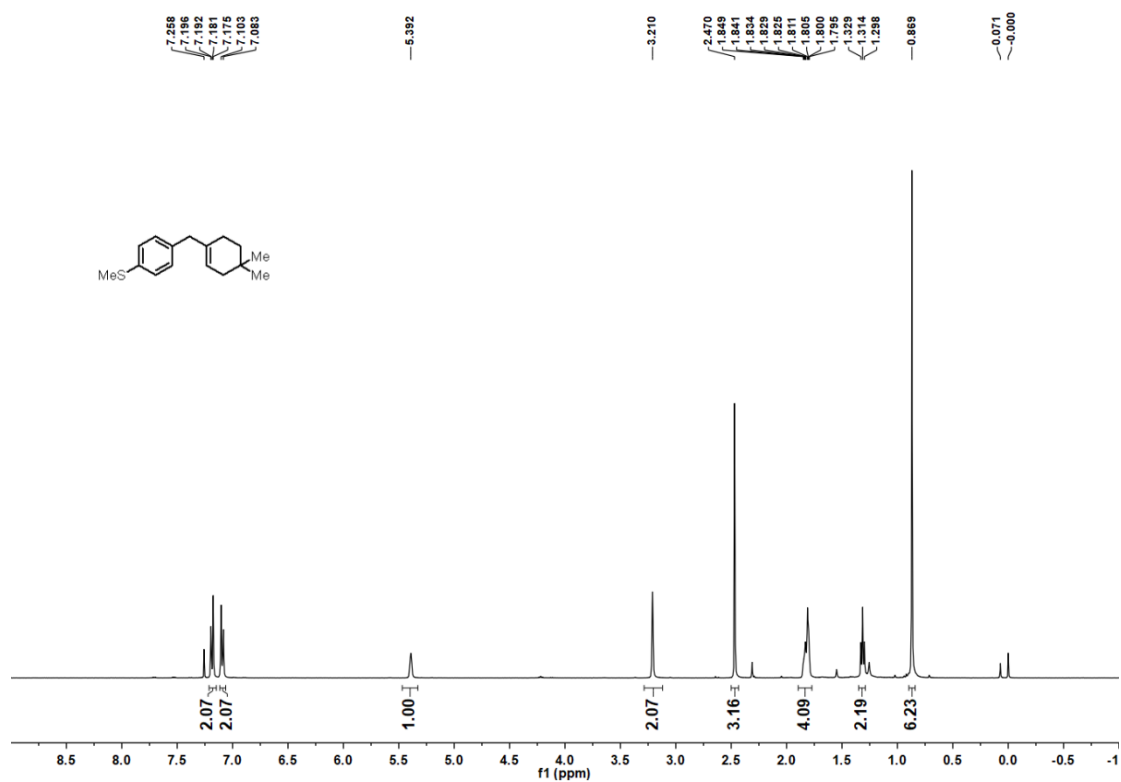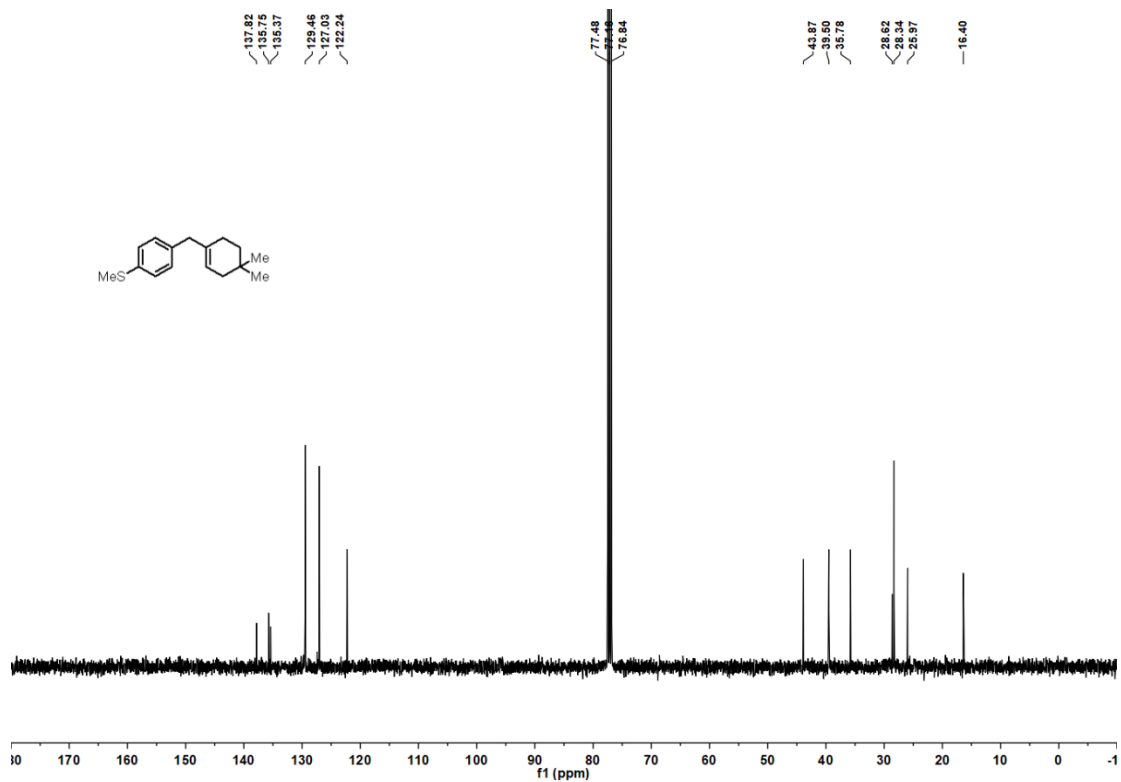

**3al,  $^1\text{H}$  NMR (600 MHz,  $\text{CDCl}_3$ );  $^{13}\text{C}$  NMR (150 MHz,  $\text{CDCl}_3$ )**

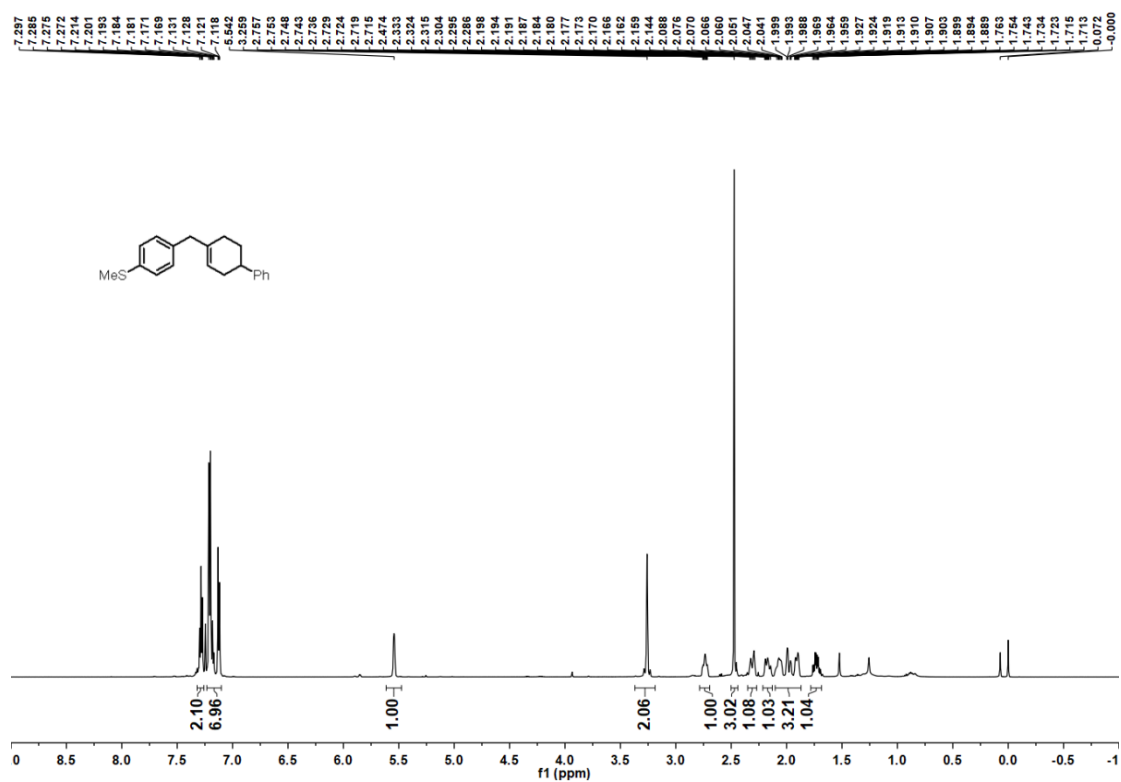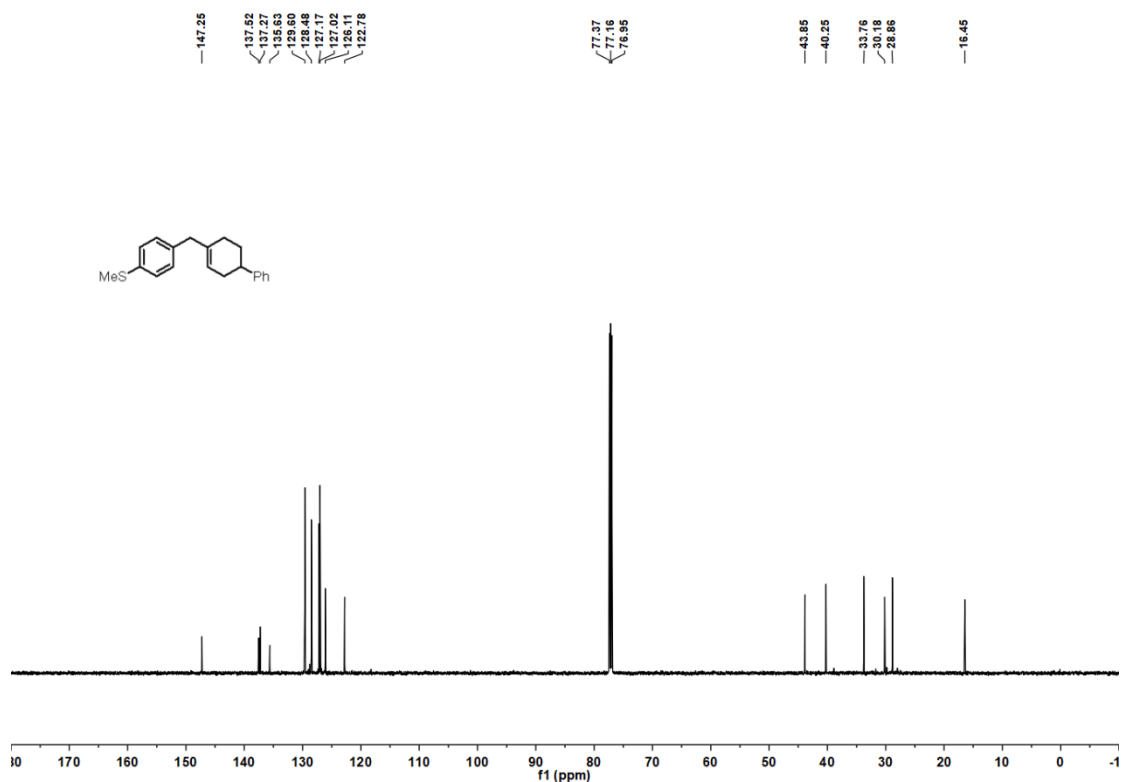

3am,  $^1\text{H}$  NMR (600 MHz,  $\text{CDCl}_3$ );  $^{13}\text{C}$  NMR (150 MHz,  $\text{CDCl}_3$ )

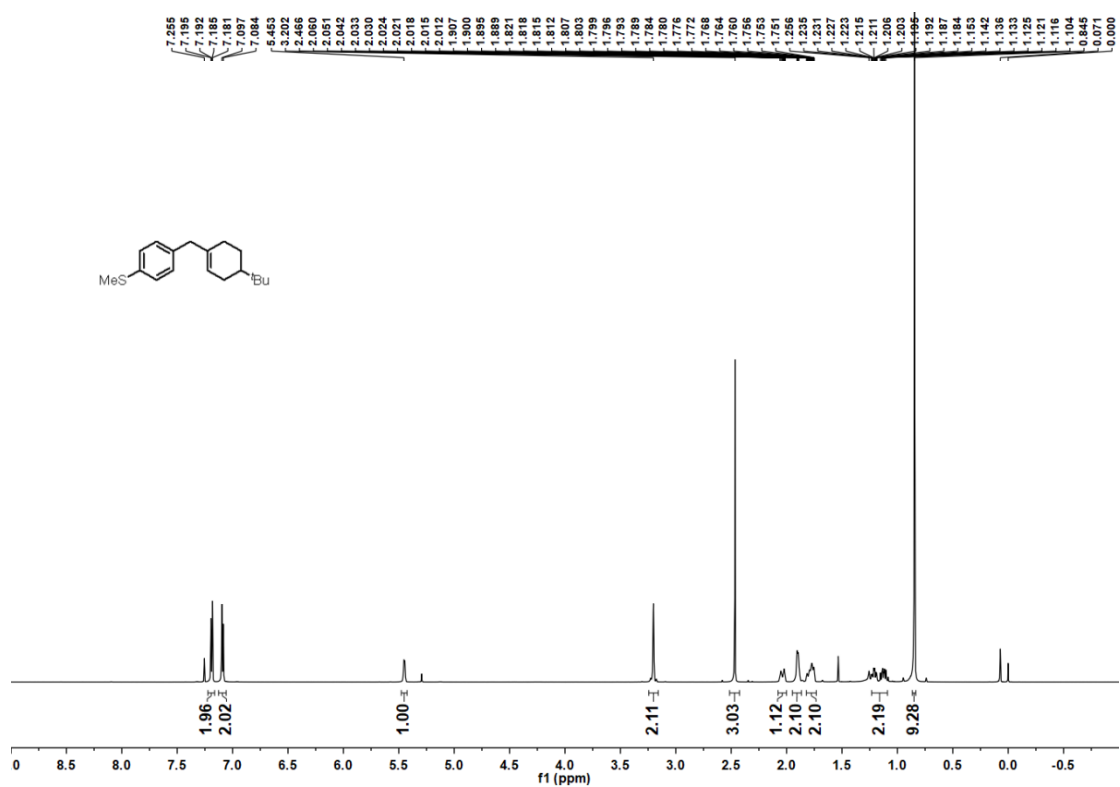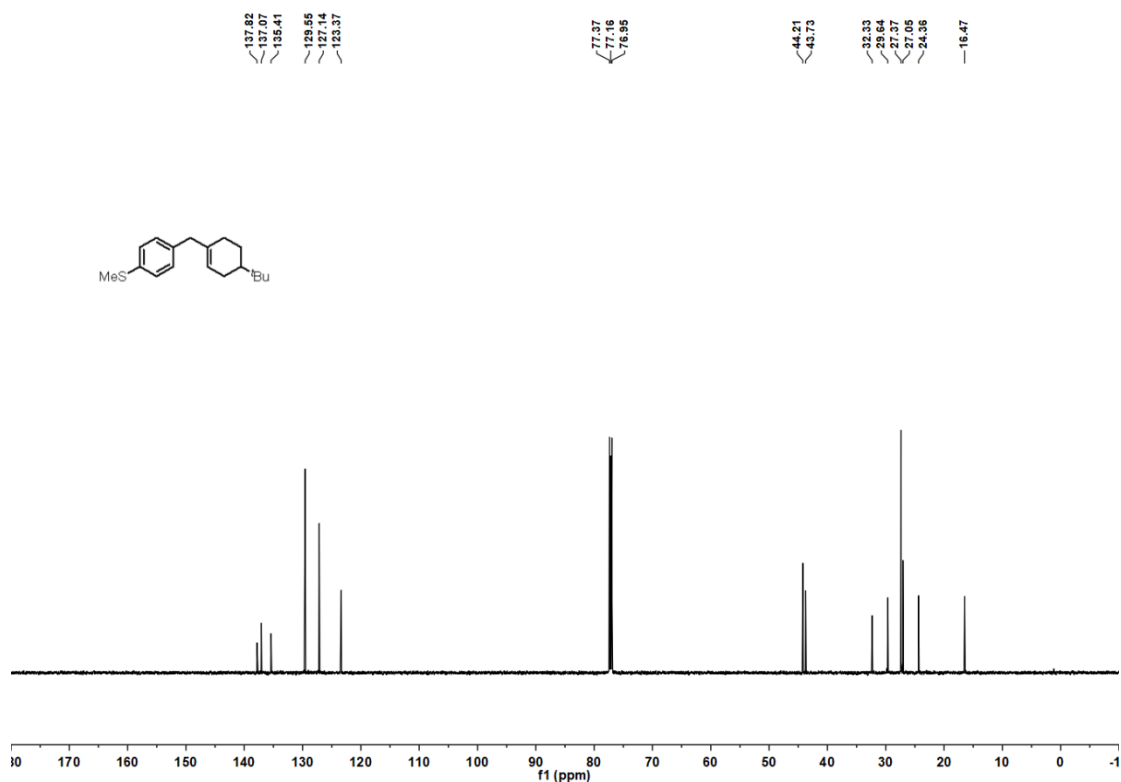



3an,  $^1\text{H}$  NMR (400 MHz,  $\text{CDCl}_3$ );  $^{13}\text{C}$  NMR (100 MHz,  $\text{CDCl}_3$ )

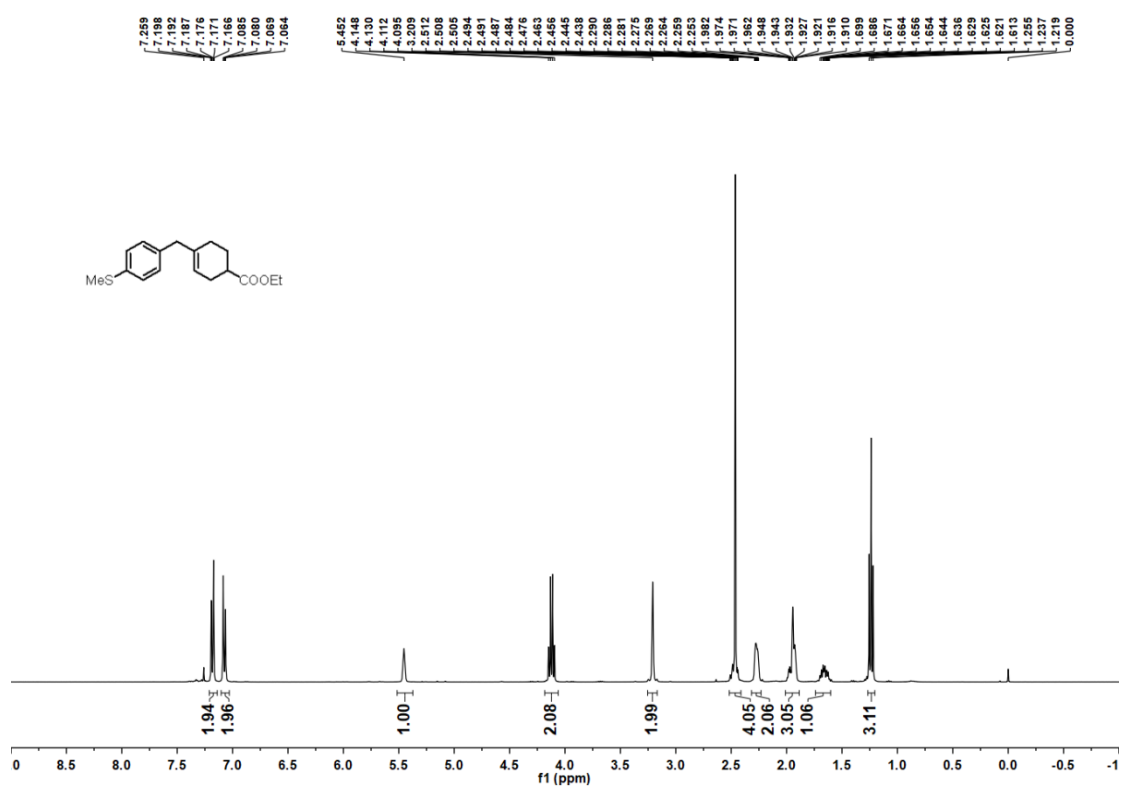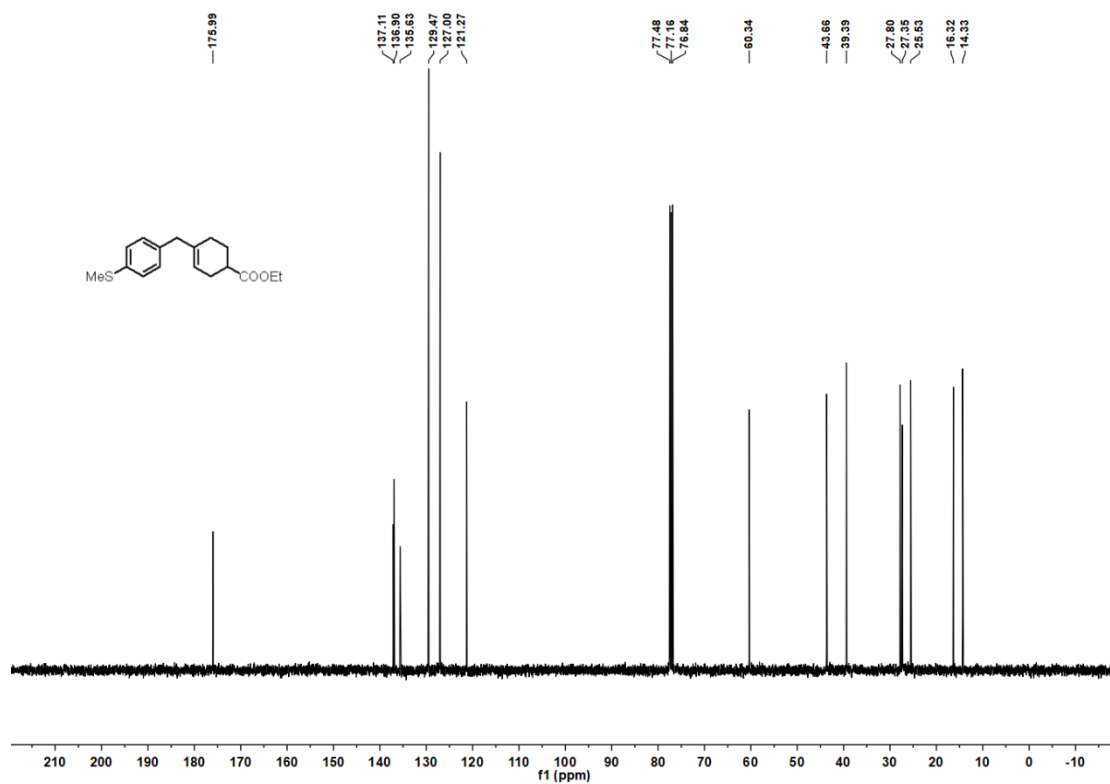

Chemical structure: CSC1=CC=C(C=C1)CC2=CC=CC3=CC2OCC3

<sup>1</sup>H NMR spectrum (ppm):

- 7.198, 7.194, 7.187, 7.184, 7.106, 7.096, 7.093 (aromatic protons, integration 1.93, 2.01)
- 5.336 (aromatic proton, integration 1.00)
- 4.08 (aromatic proton, integration 4.08)
- 3.853 (methoxy protons, integration 2.04)
- 2.455, 2.389, 2.128, 2.122, 2.115, 2.111, 2.104, 2.101, 1.722, 1.721, 1.710 (aliphatic protons, integration 3.02, 2.05, 2.06, 2.13)
- 0.072, -0.001 (TMS, integration 0.00)

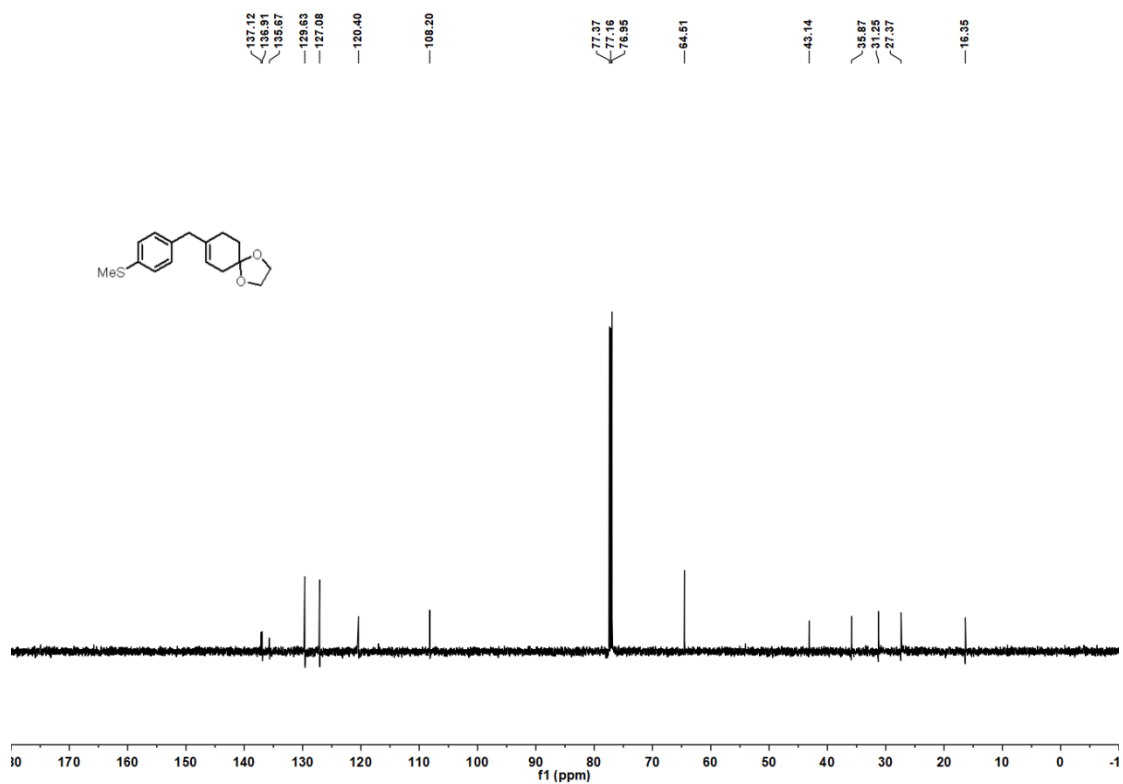

**3ap,  $^1\text{H}$  NMR (400 MHz,  $\text{CDCl}_3$ );  $^{13}\text{C}$  NMR (100 MHz,  $\text{CDCl}_3$ )**

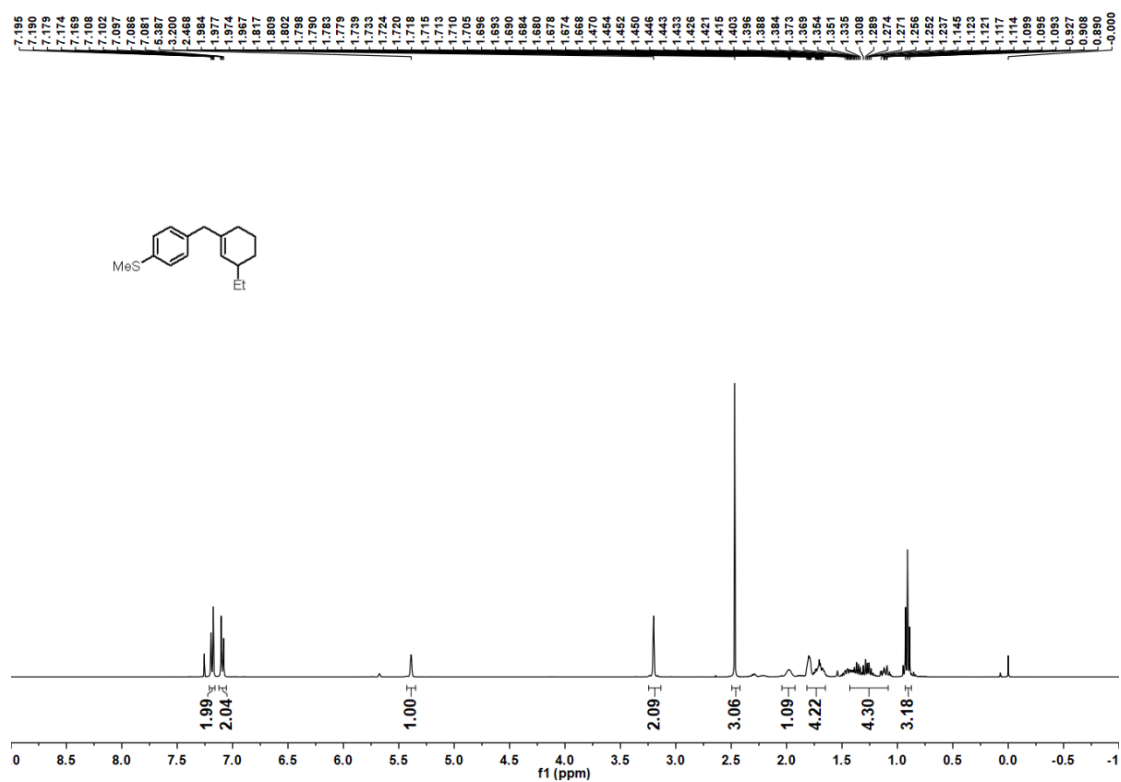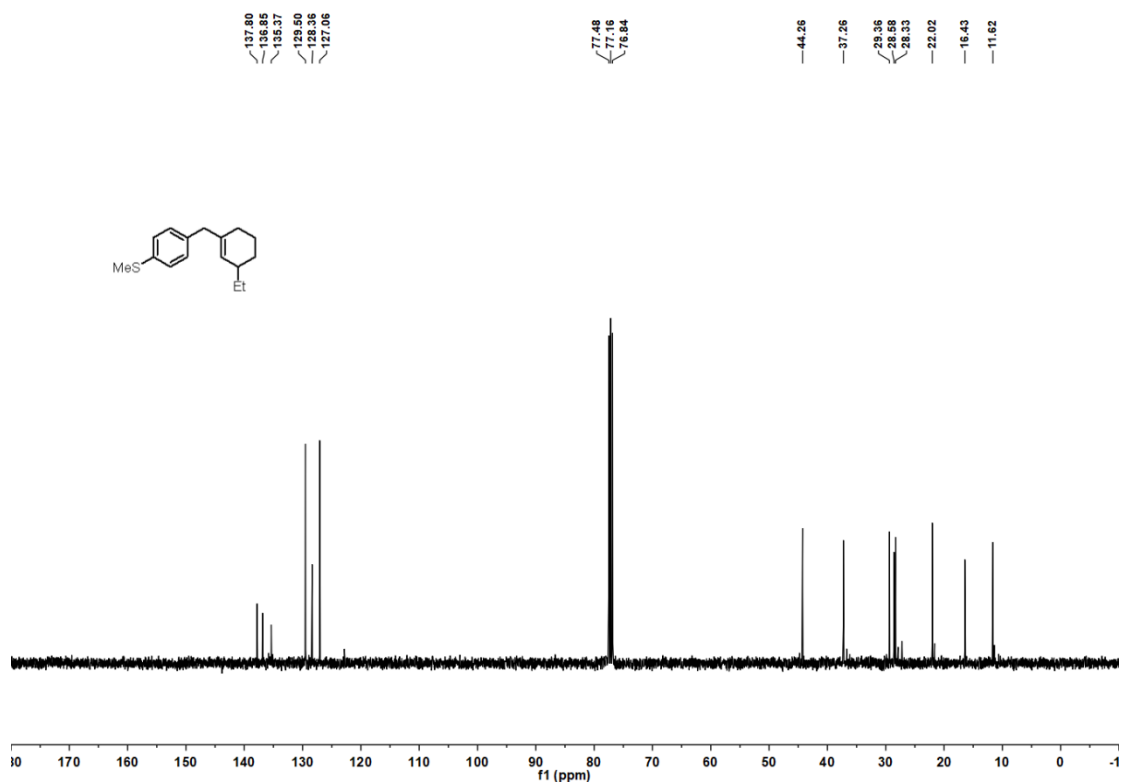

**3aq,  $^1\text{H}$  NMR (600 MHz,  $\text{CDCl}_3$ );  $^{13}\text{C}$  NMR (150 MHz,  $\text{CDCl}_3$ )**

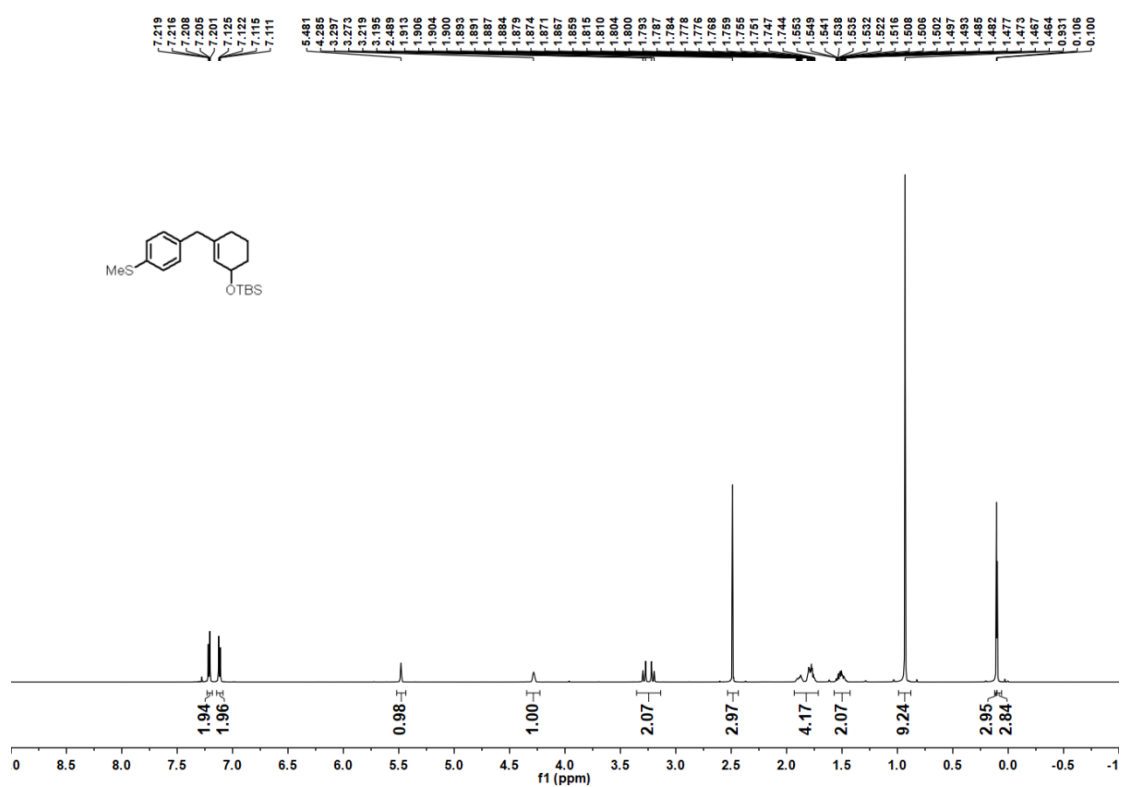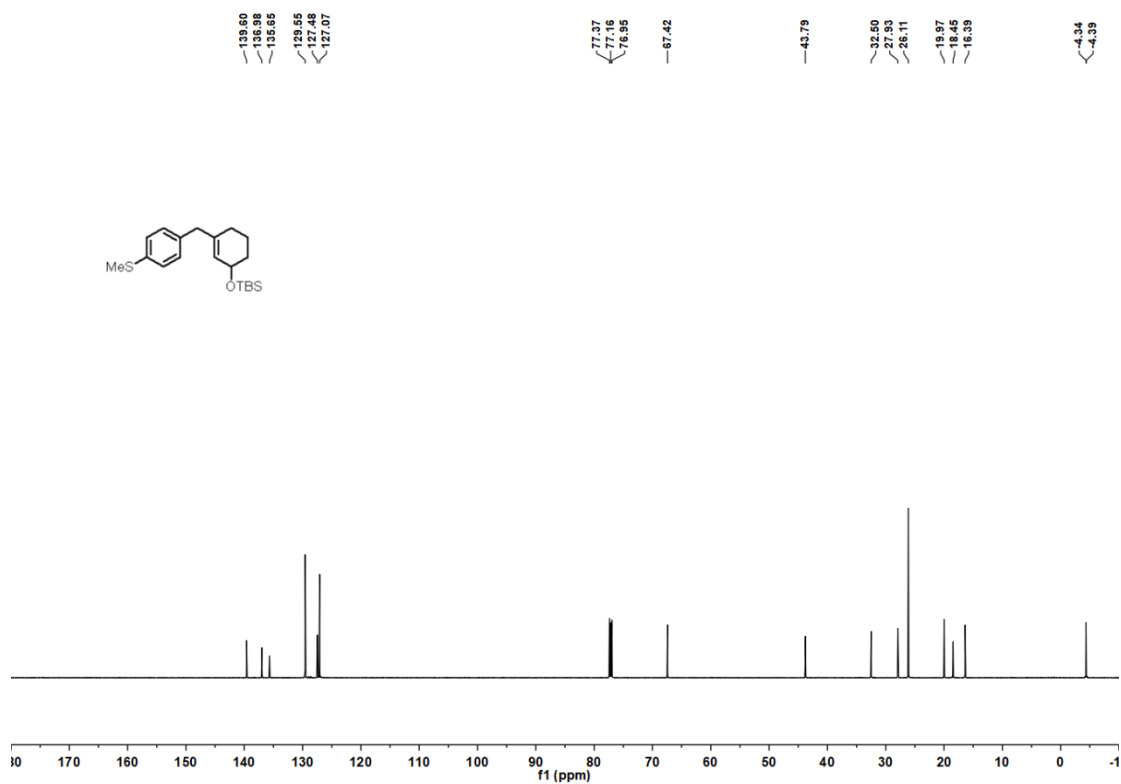

Chemical structure: Cc1ccc(cc1)Cc2c3ccccc3c4ccccc24

<sup>1</sup>H NMR spectrum (CDCl<sub>3</sub>) showing peaks in the aromatic region (7.0-7.3 ppm), a methylene peak (2.6 ppm), and a methyl peak (0.9 ppm). Integration values are provided below the peaks.

| Chemical Shift (ppm)                                                        | Integration      |
|-----------------------------------------------------------------------------|------------------|
| 7.258, 7.255, 7.184, 7.181, 7.183, 7.180, 7.177, 7.164, 7.161, 7.098, 7.087 | 2.06, 2.10       |
| 5.592                                                                       | 1.00             |
| 3.359, 3.343, 3.332, 3.331, 3.325, 3.304                                    | 2.09             |
| 2.784, 2.771, 2.770, 2.688, 2.689                                           | 1.07, 1.07, 3.09 |
| 1.636, 1.628, 1.588, 1.552, 1.549, 1.544, 1.375, 1.371, 1.365, 1.362, 1.358 | 2.09, 1.08       |
| 1.077, 1.064, 1.037, 1.034, 1.031, 1.024, 0.994, 0.992, 0.990, 0.988, 0.983 | 2.08, 1.09       |

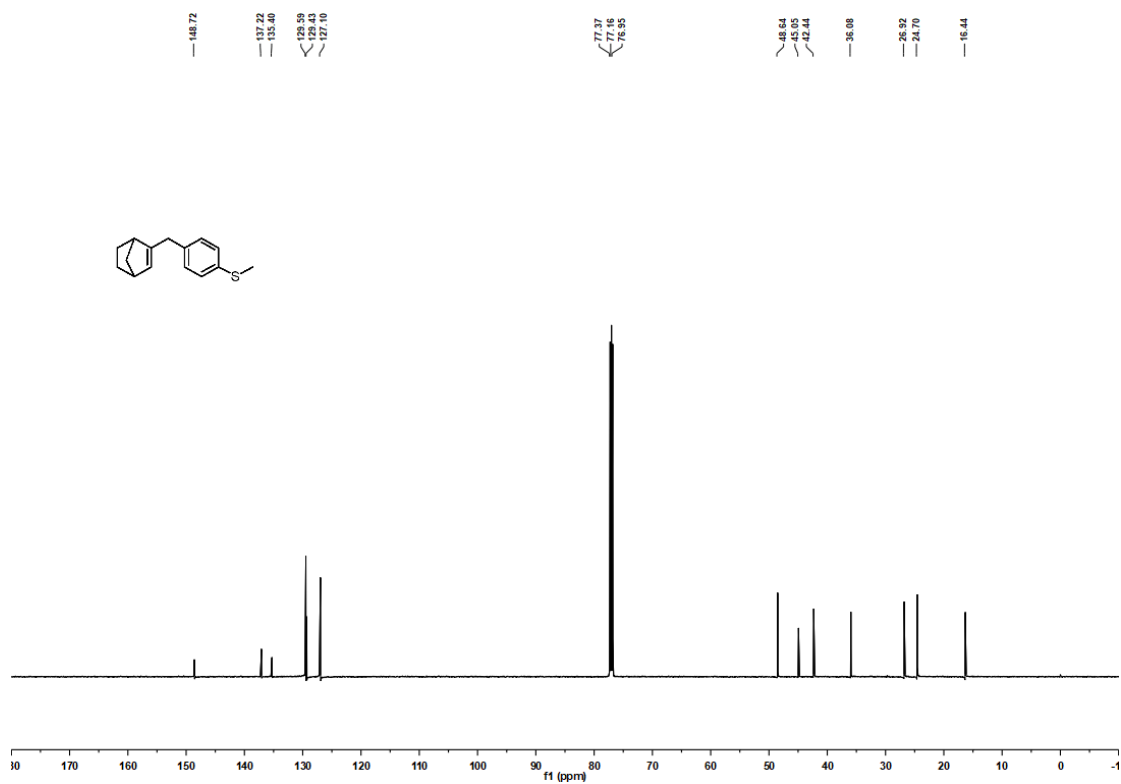

3as,  $^1\text{H}$  NMR (400 MHz,  $\text{CDCl}_3$ );  $^{13}\text{C}$  NMR (150 MHz,  $\text{CDCl}_3$ )

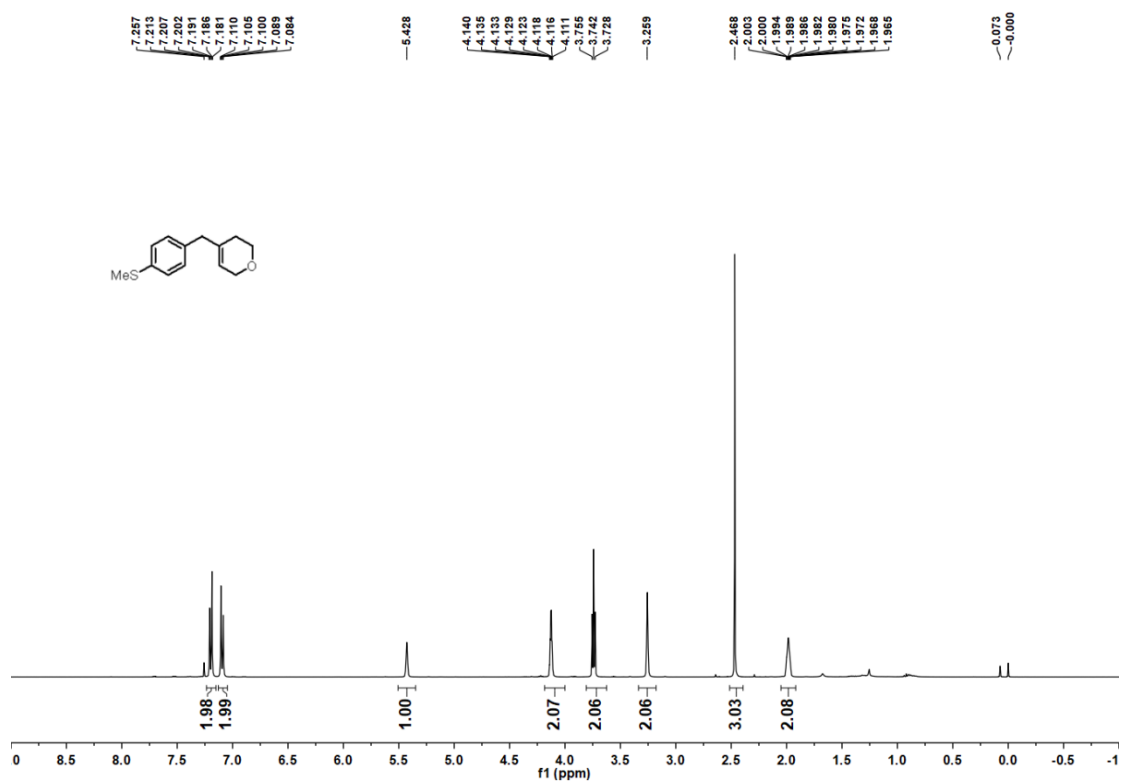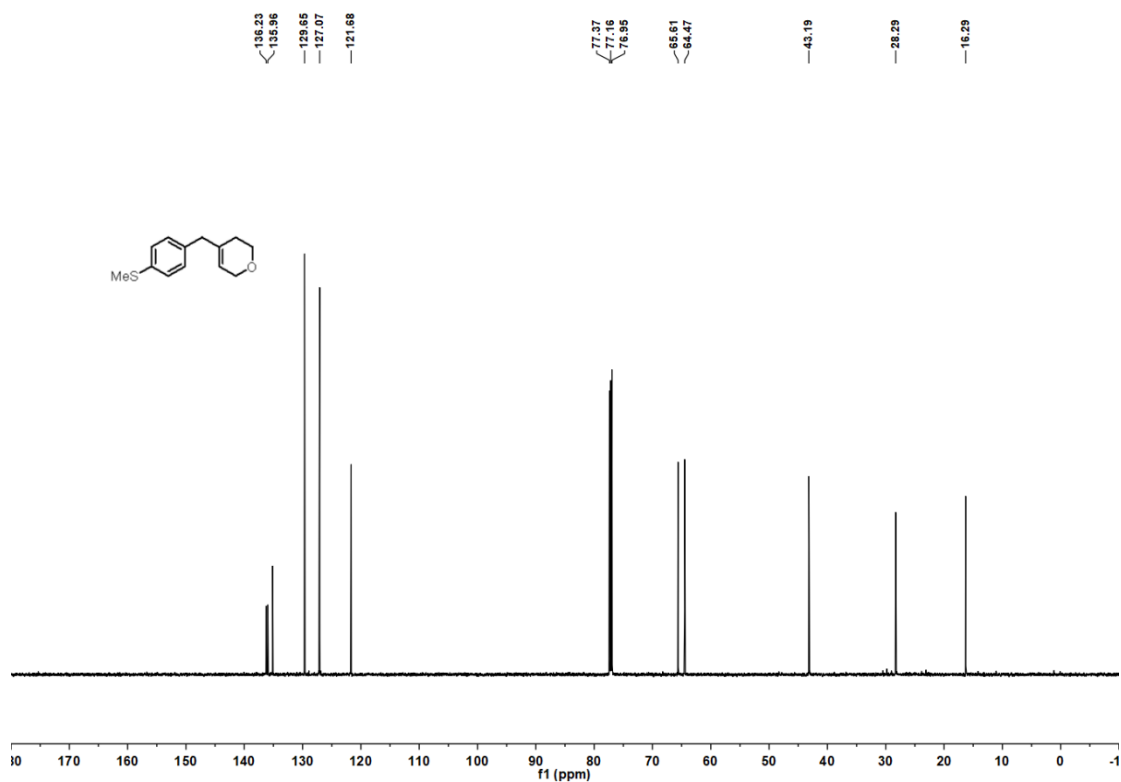

**3at,  $^1\text{H}$  NMR (600 MHz,  $\text{CDCl}_3$ );  $^{13}\text{C}$  NMR (150 MHz,  $\text{CDCl}_3$ )**

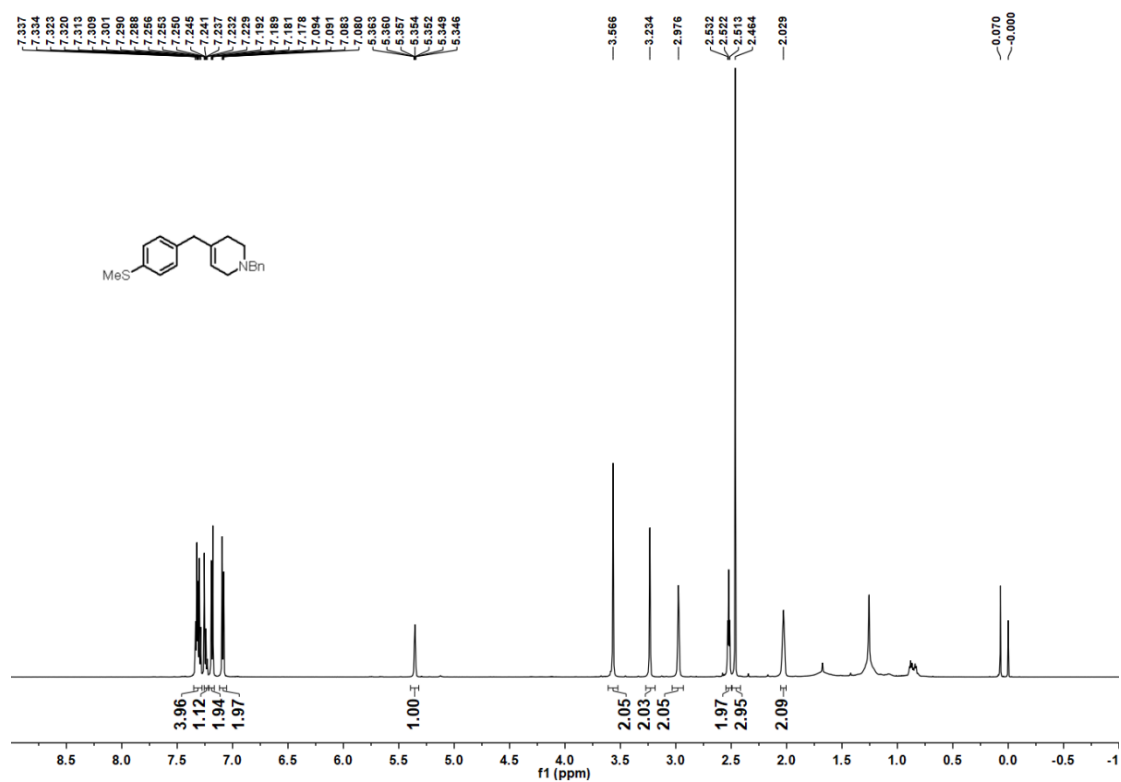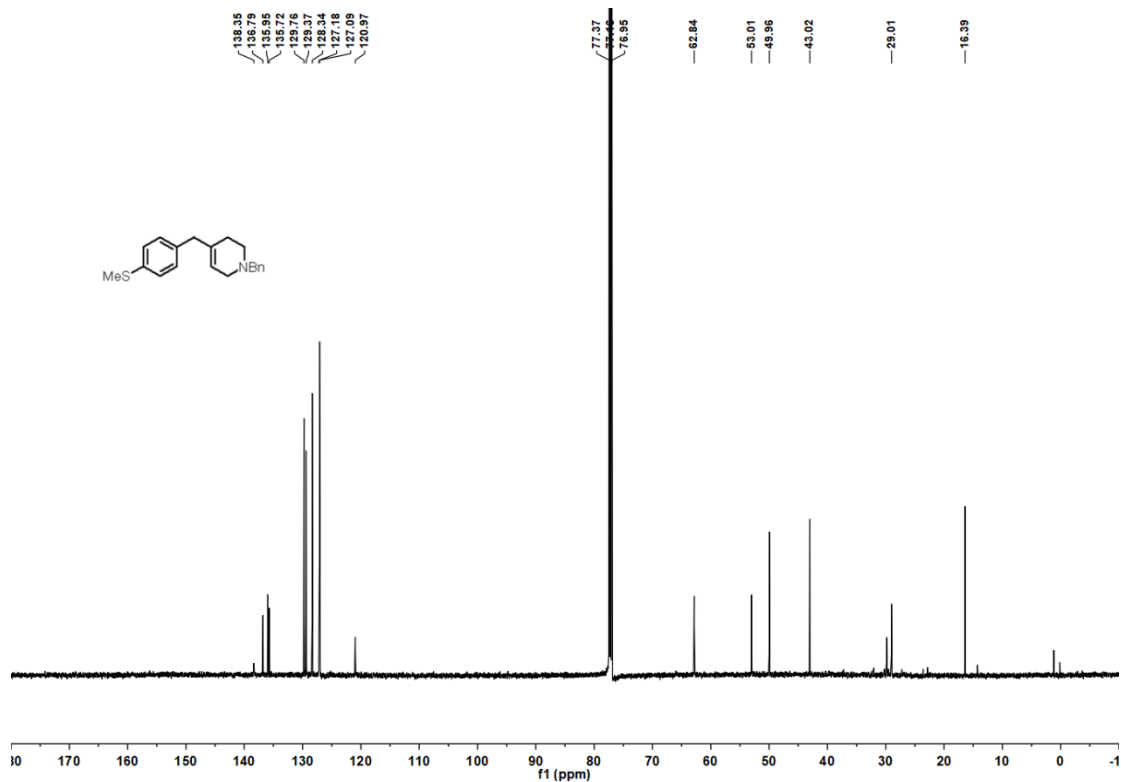

3au,  $^1\text{H}$  NMR (600 MHz,  $\text{CDCl}_3$ );  $^{13}\text{C}$  NMR (150 MHz,  $\text{CDCl}_3$ )

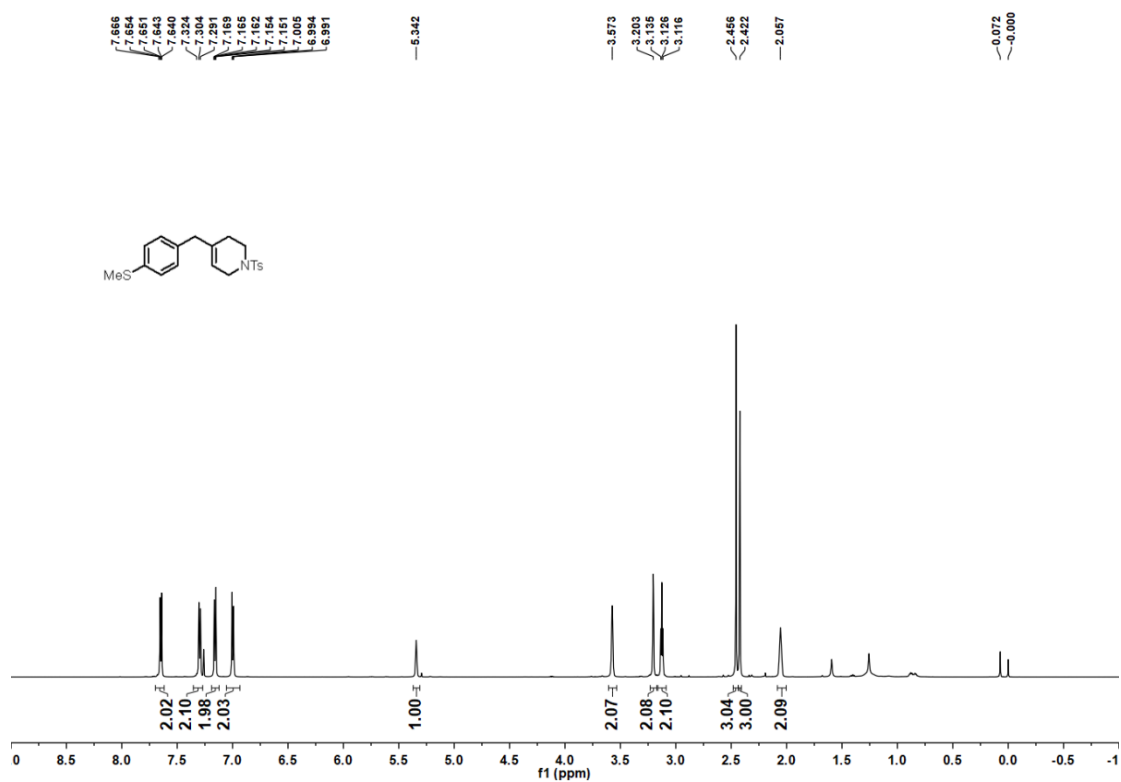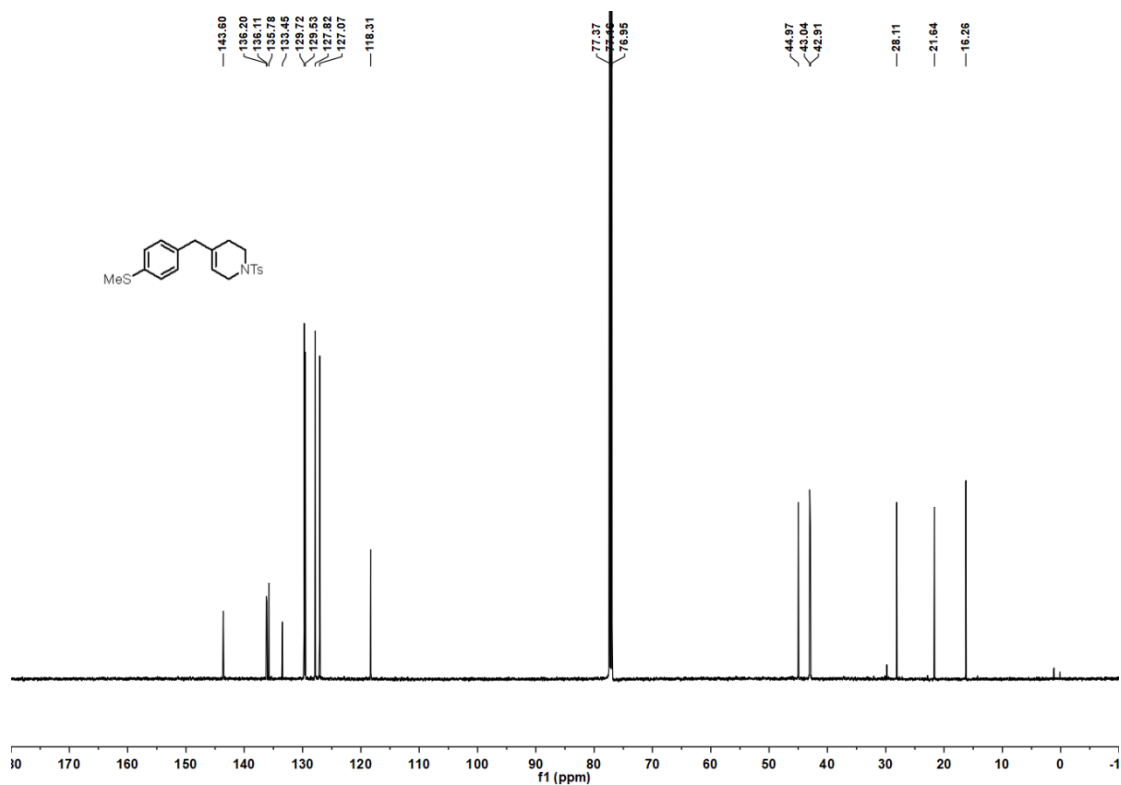



3av,  $^1\text{H}$  NMR (400 MHz,  $\text{CDCl}_3$ );  $^{13}\text{C}$  NMR (100 MHz,  $\text{CDCl}_3$ )

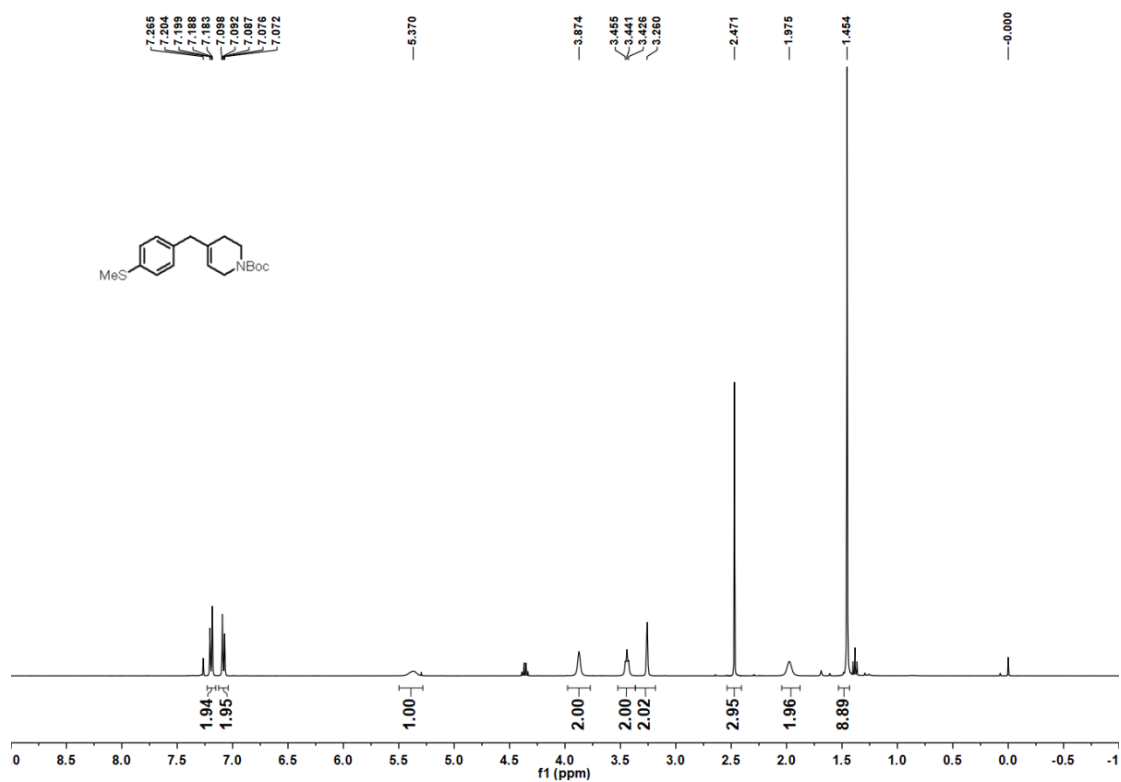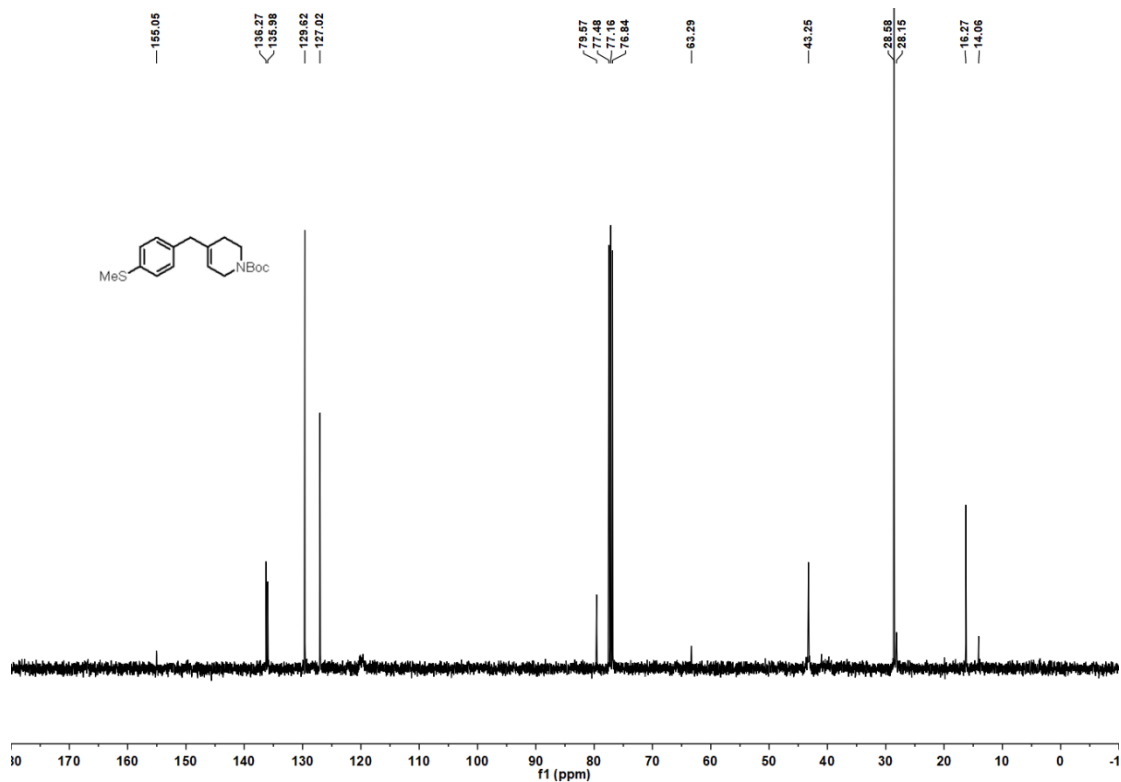

3aw,  $^1\text{H}$  NMR (600 MHz,  $\text{CDCl}_3$ );  $^{13}\text{C}$  NMR (150 MHz,  $\text{CDCl}_3$ )

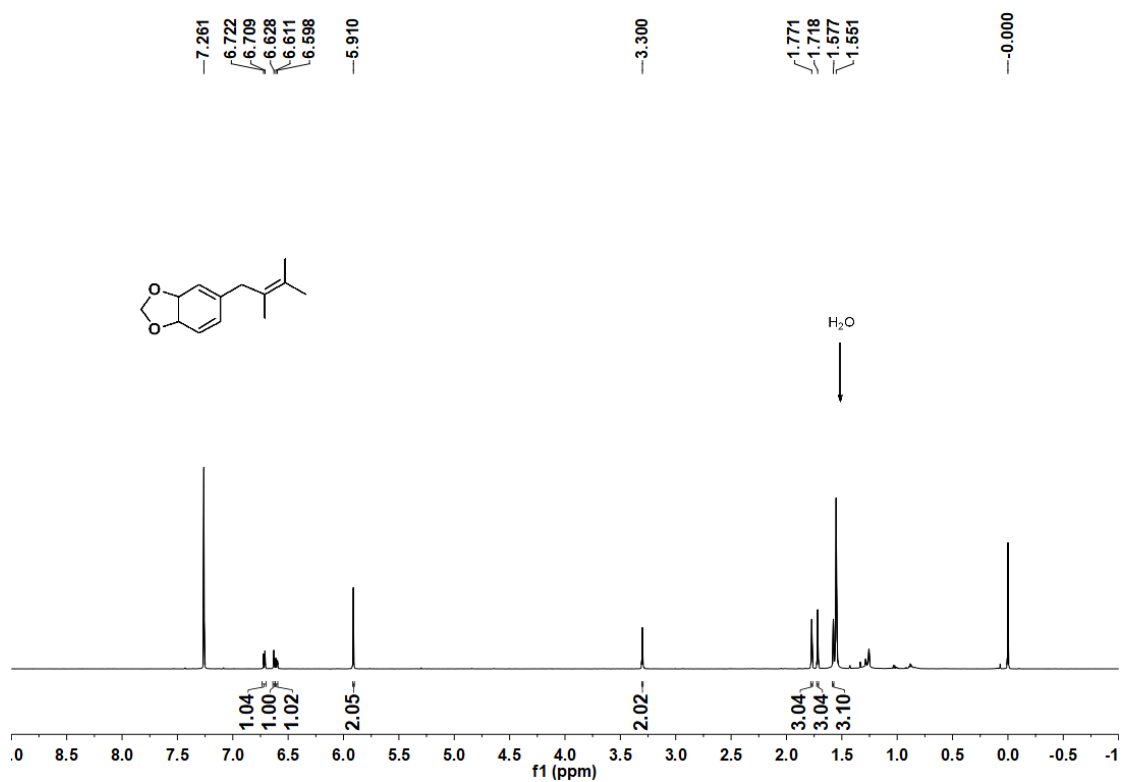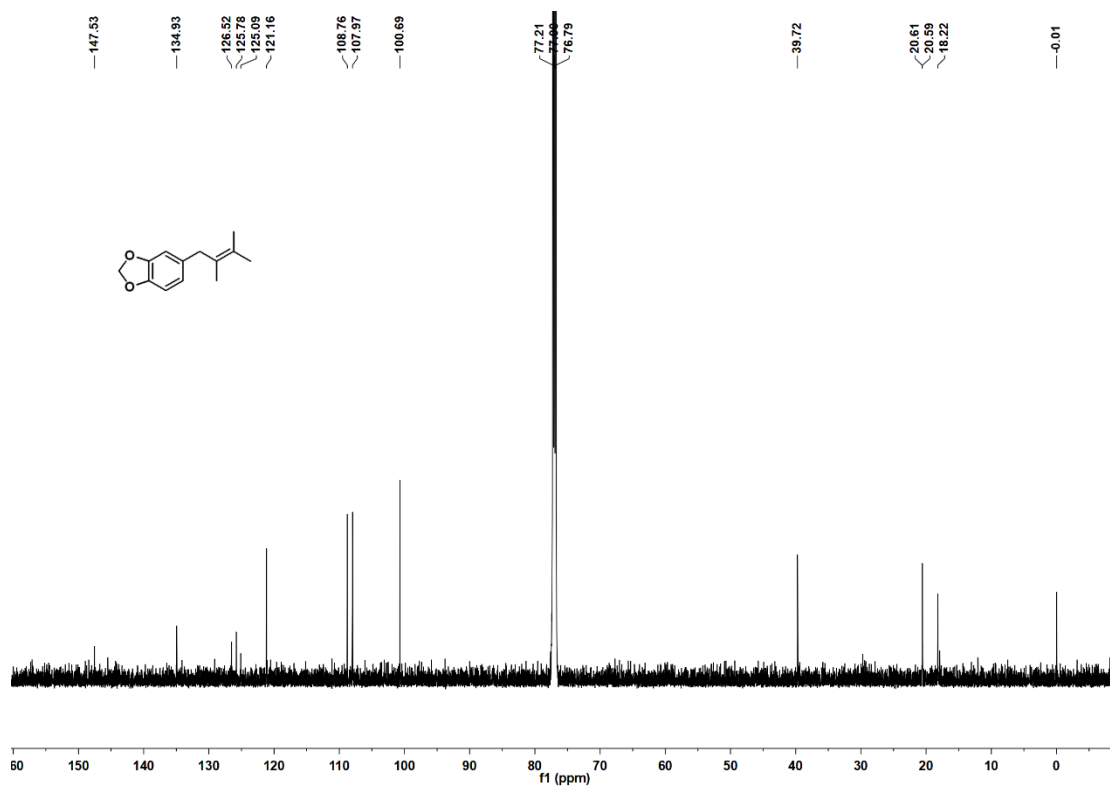

3ax,  $^1\text{H}$  NMR (600 MHz,  $\text{CDCl}_3$ );  $^{13}\text{C}$  NMR (150 MHz,  $\text{CDCl}_3$ )

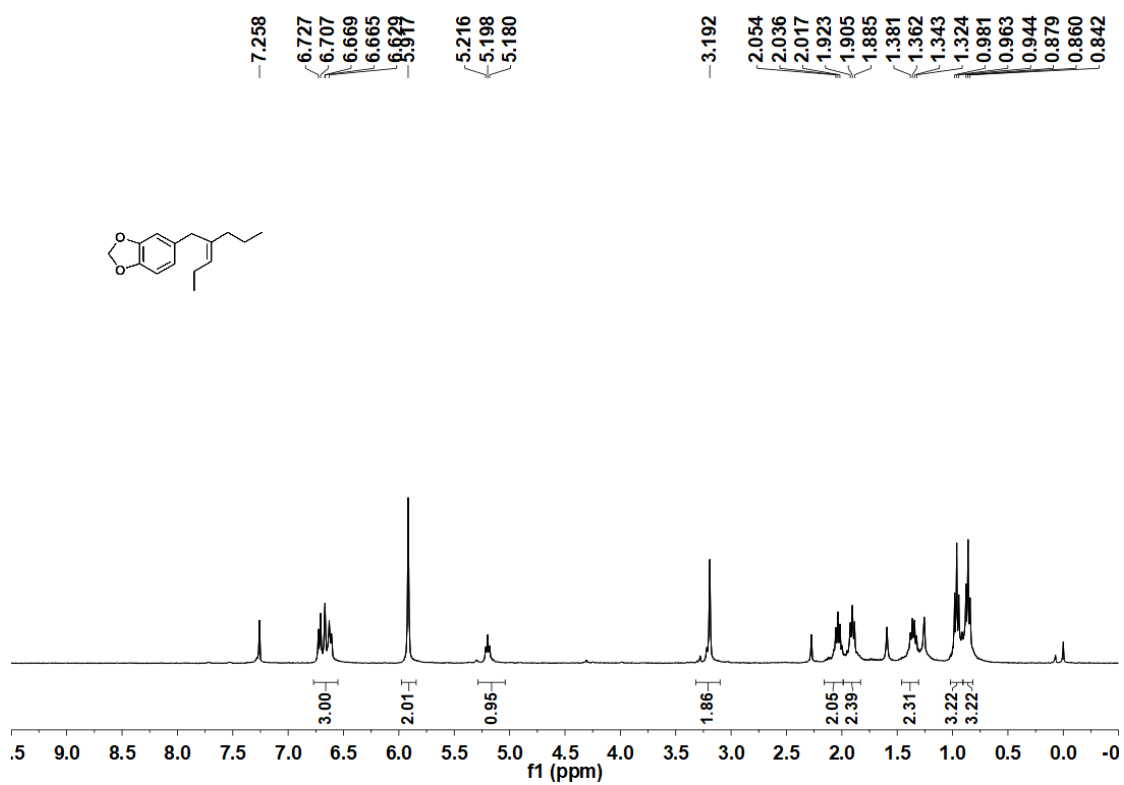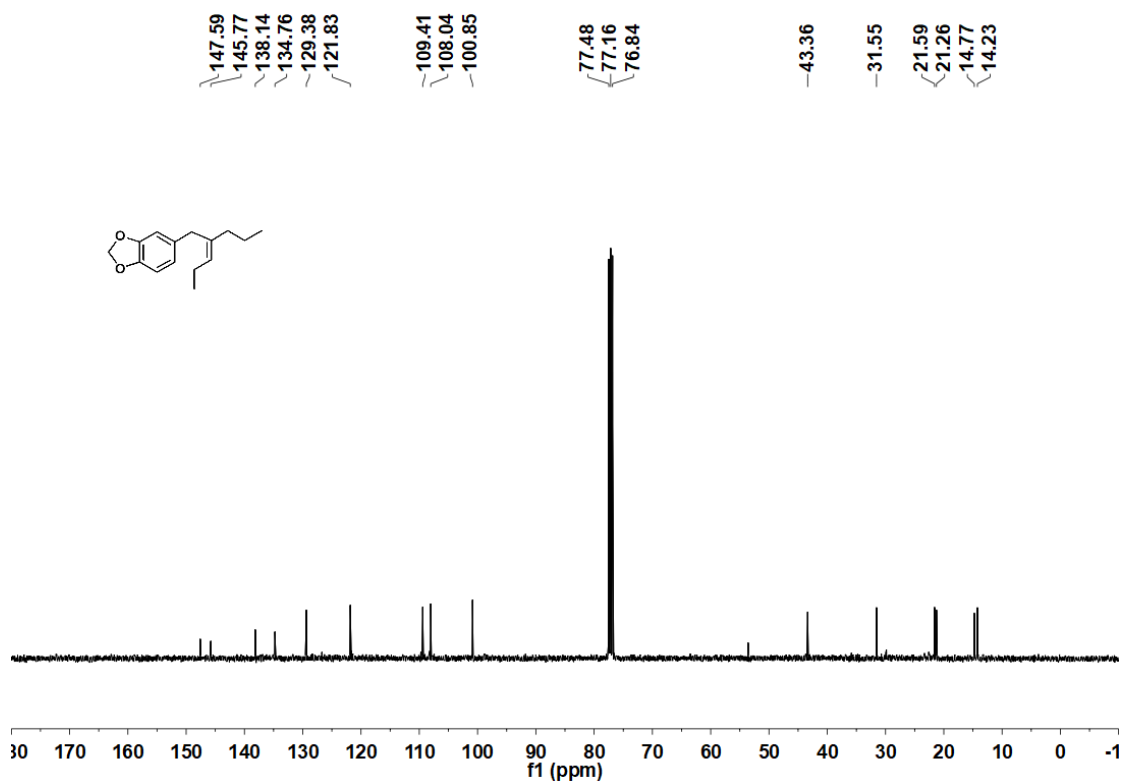

4, <sup>1</sup>H NMR (600 MHz, CDCl<sub>3</sub>); <sup>13</sup>C NMR (150 MHz, CDCl<sub>3</sub>)

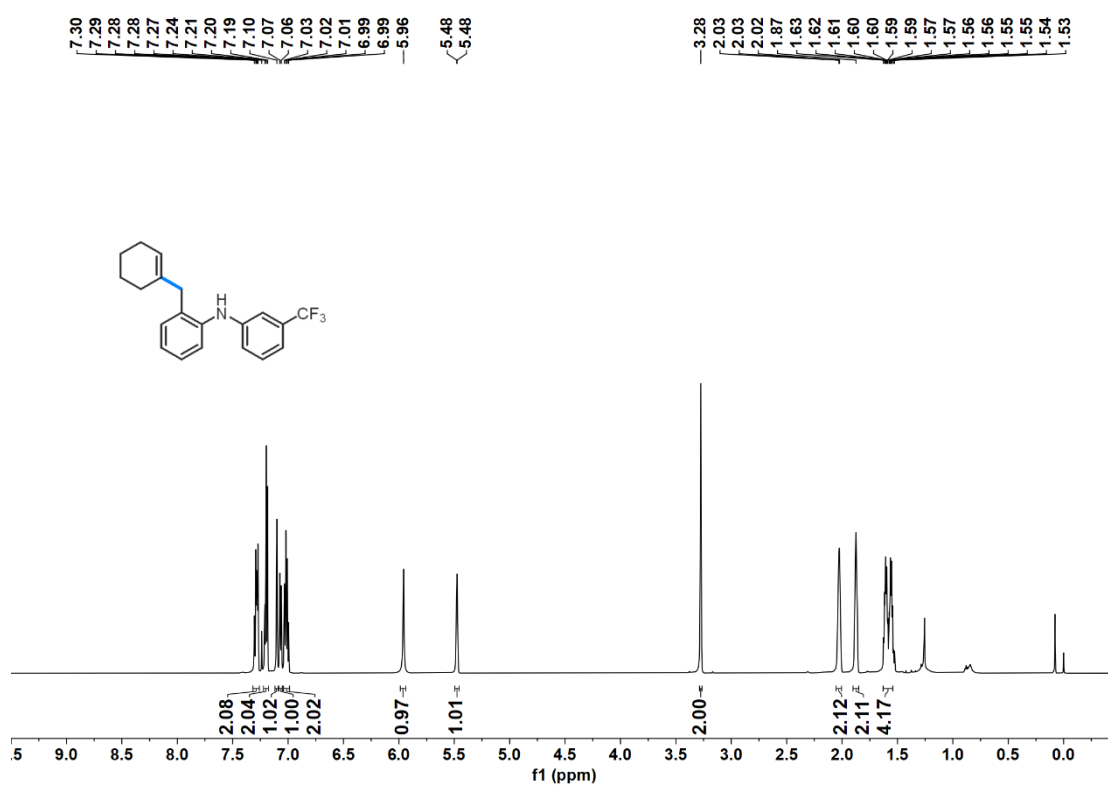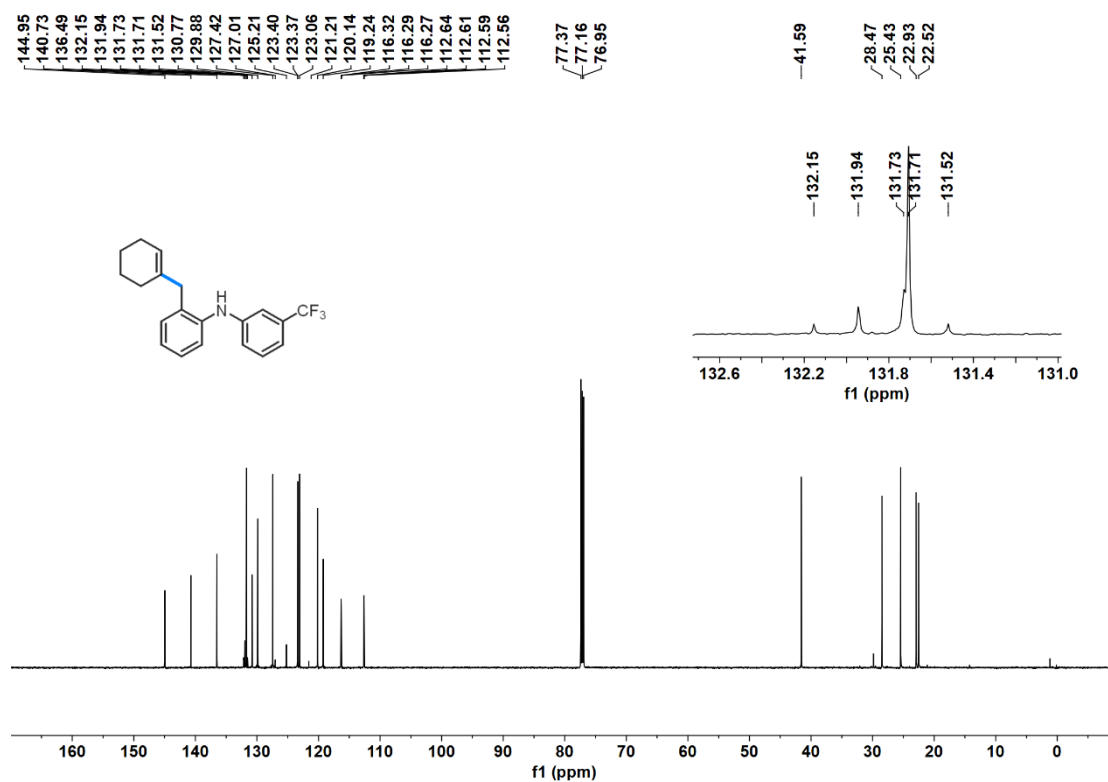

4,  $^{19}\text{F}$  NMR (376 MHz,  $\text{CDCl}_3$ )

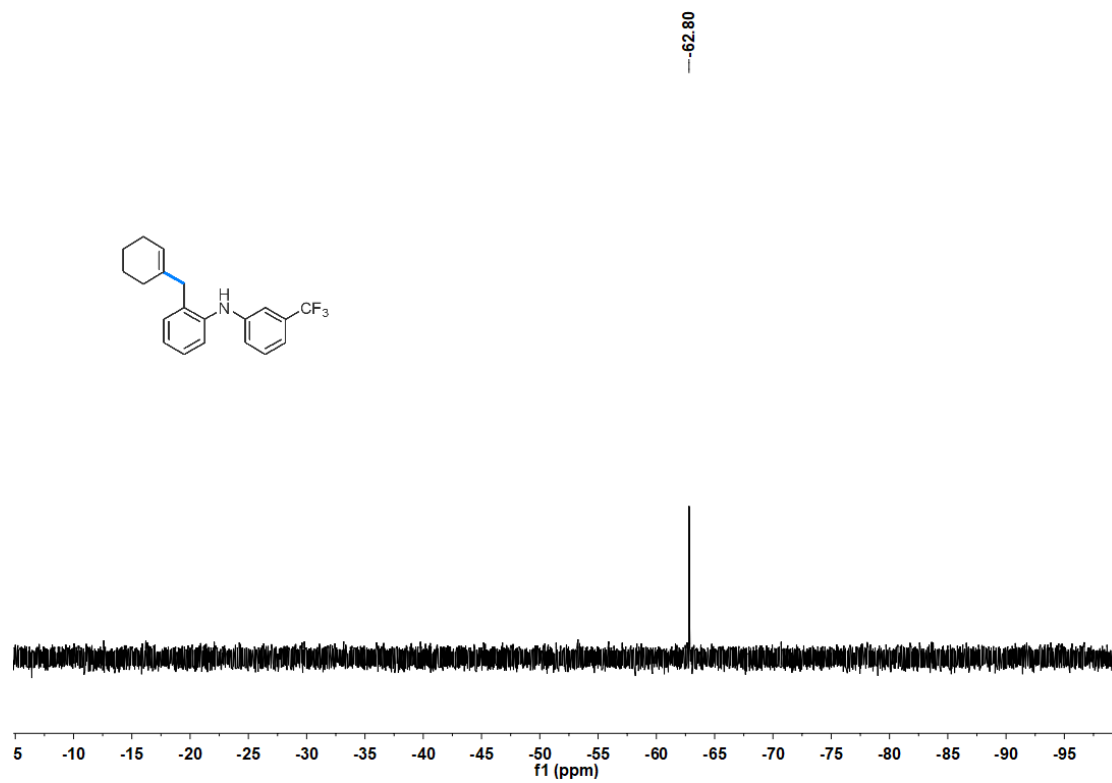

5,  $^1\text{H}$  NMR (600 MHz,  $\text{CDCl}_3$ );  $^{13}\text{C}$  NMR (150 MHz,  $\text{CDCl}_3$ )

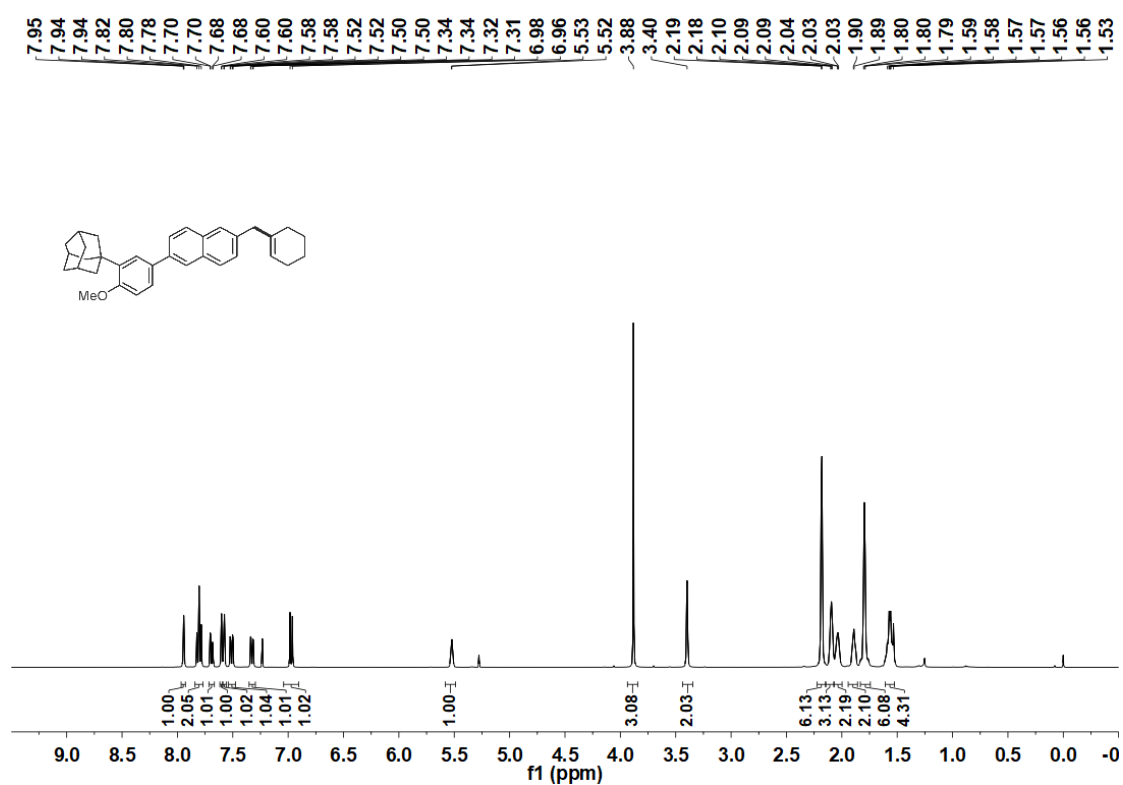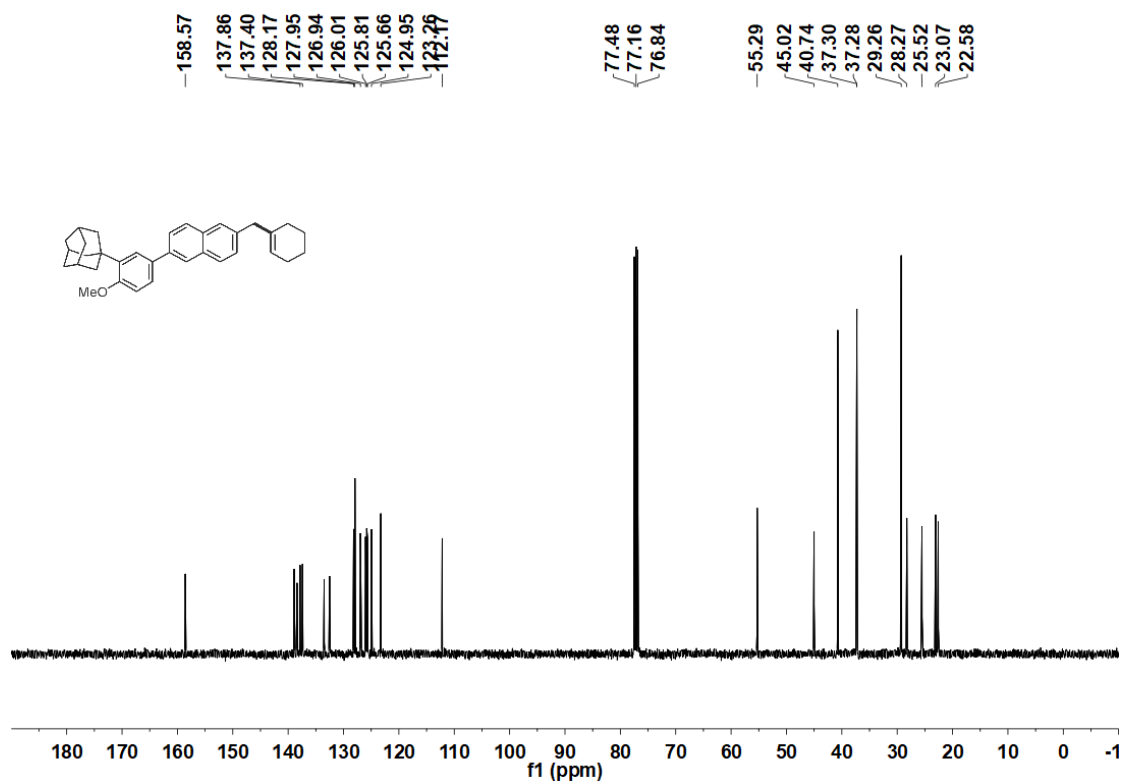

6,  $^1\text{H}$  NMR (600 MHz,  $\text{CDCl}_3$ );  $^{13}\text{C}$  NMR (150 MHz,  $\text{CDCl}_3$ )

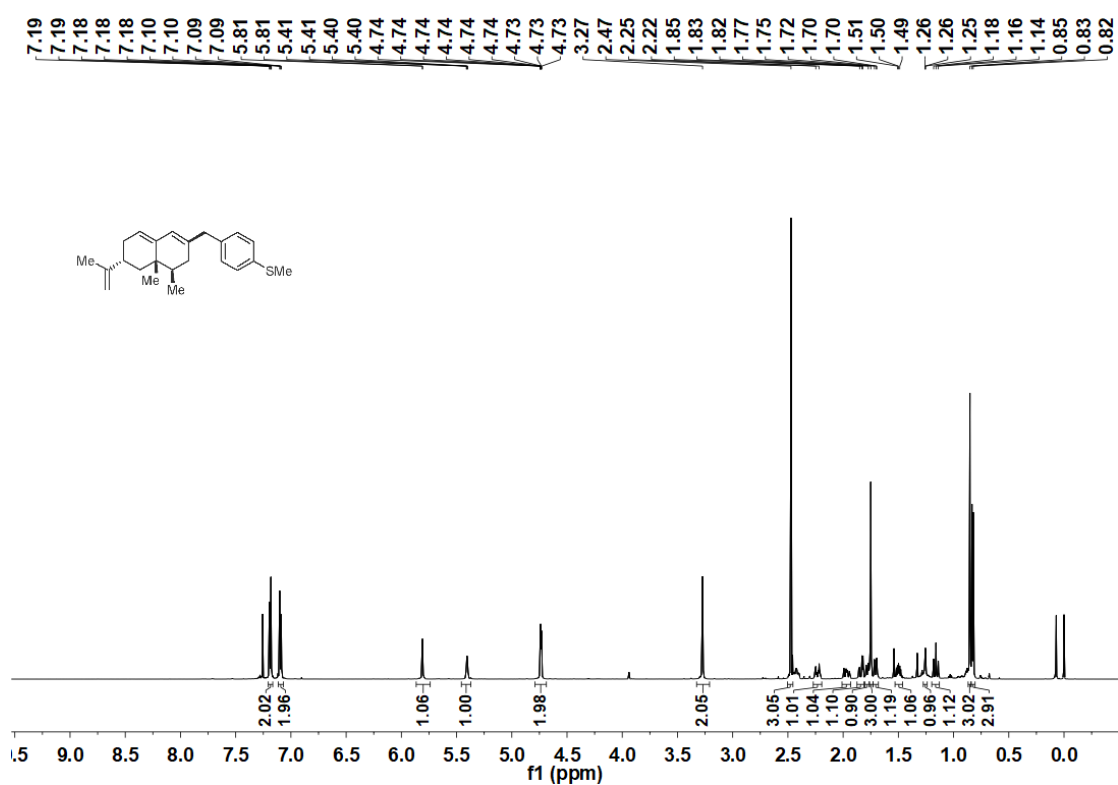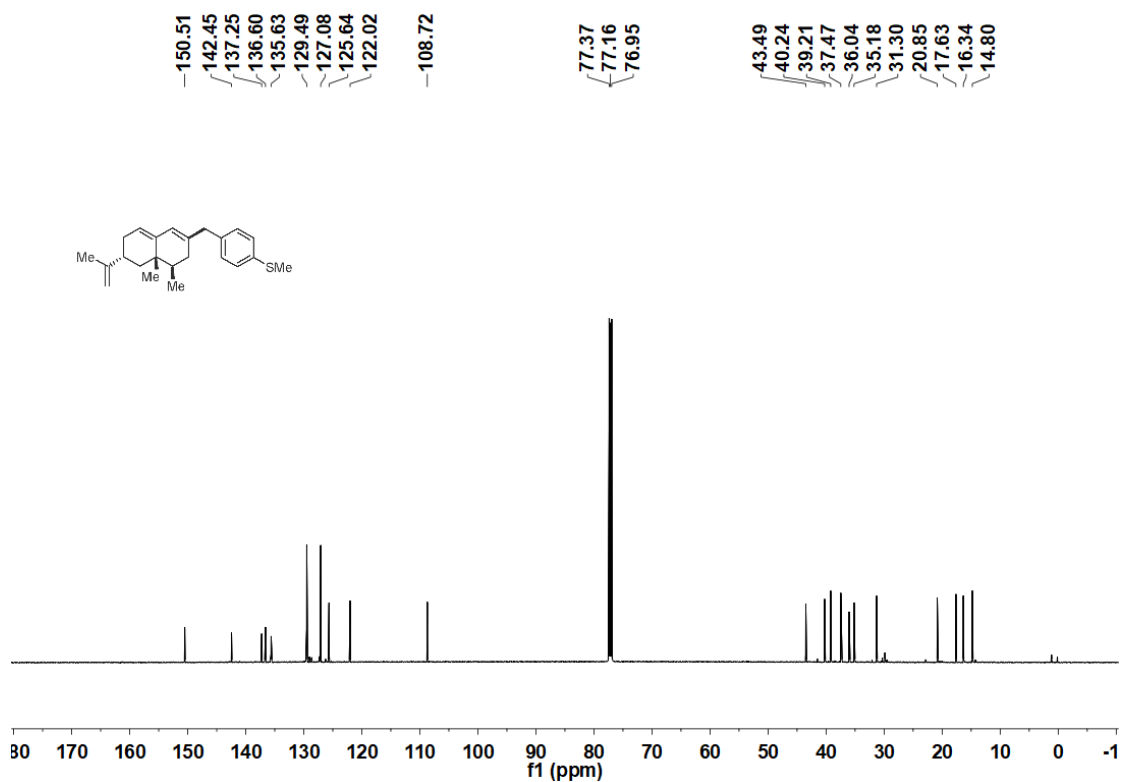

7,  $^1\text{H}$  NMR (400 MHz,  $\text{CDCl}_3$ );  $^{13}\text{C}$  NMR (100 MHz,  $\text{CDCl}_3$ )

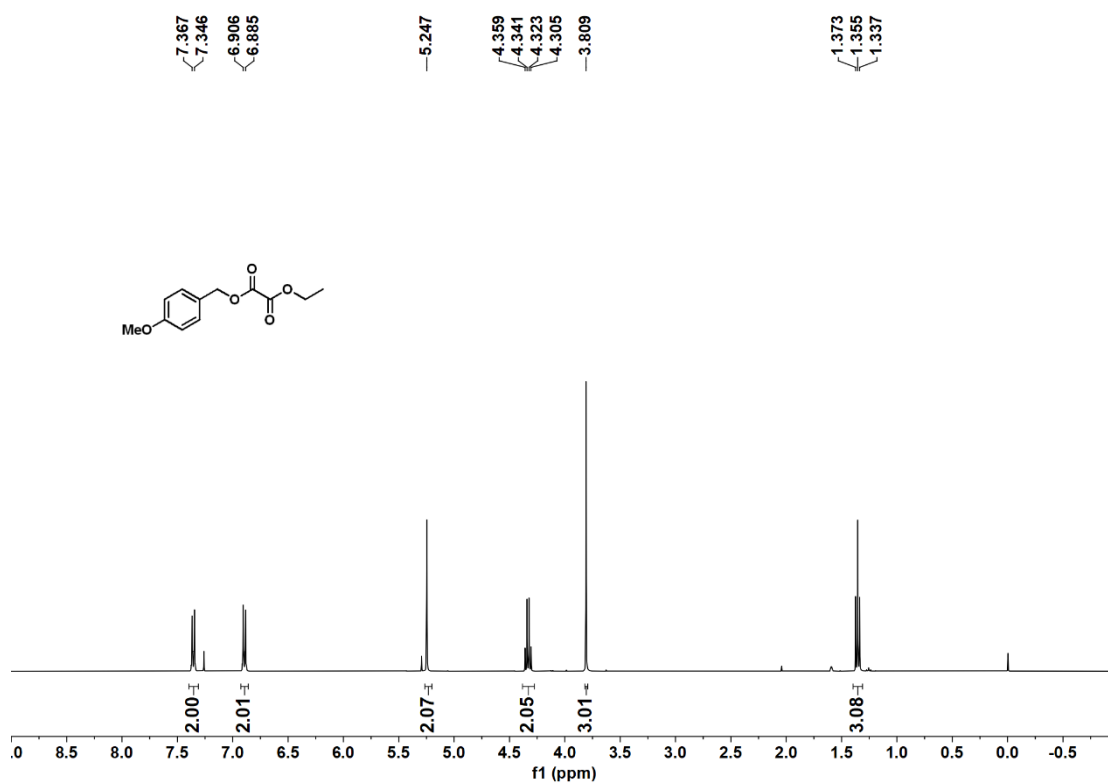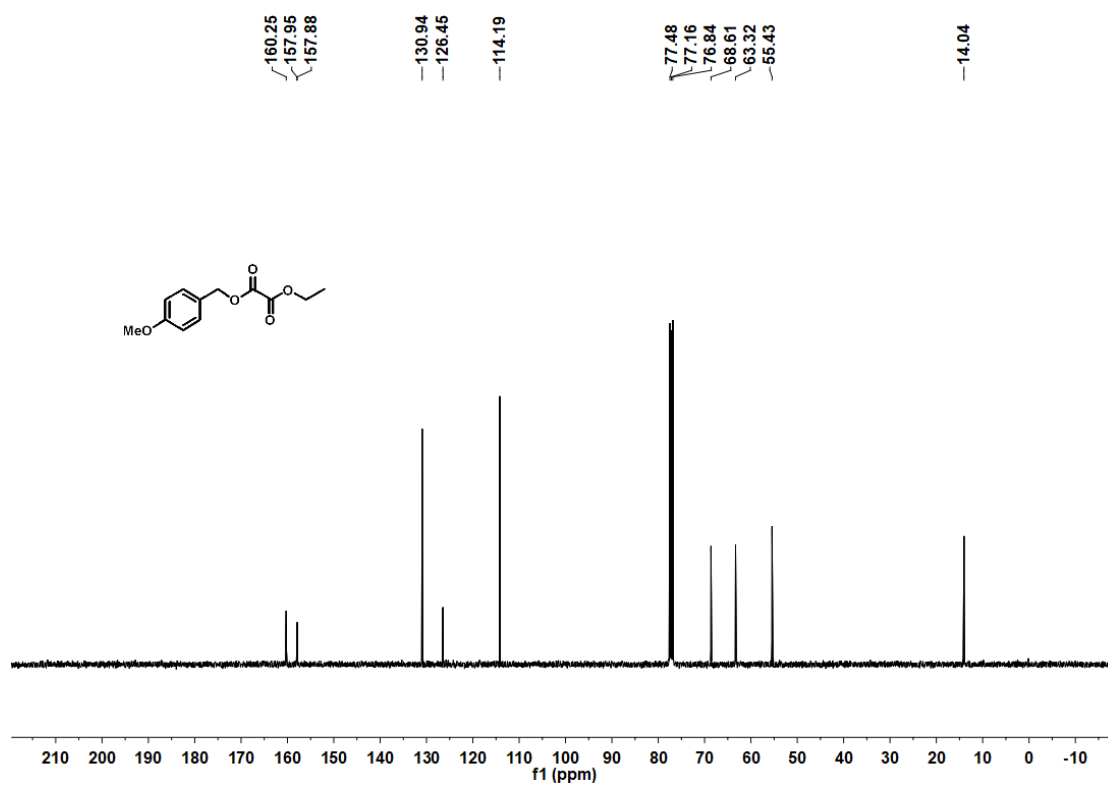



8,  $^1\text{H}$  NMR (600 MHz,  $\text{CDCl}_3$ );  $^{13}\text{C}$  NMR (150 MHz,  $\text{CDCl}_3$ )

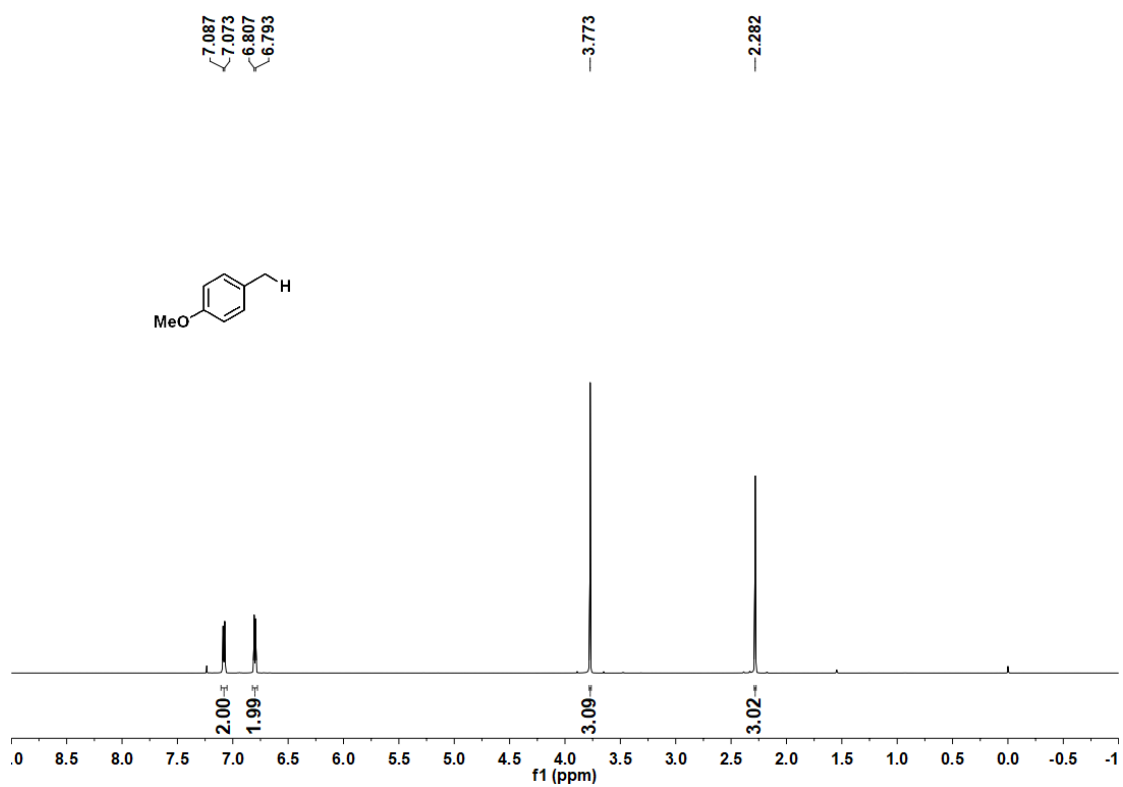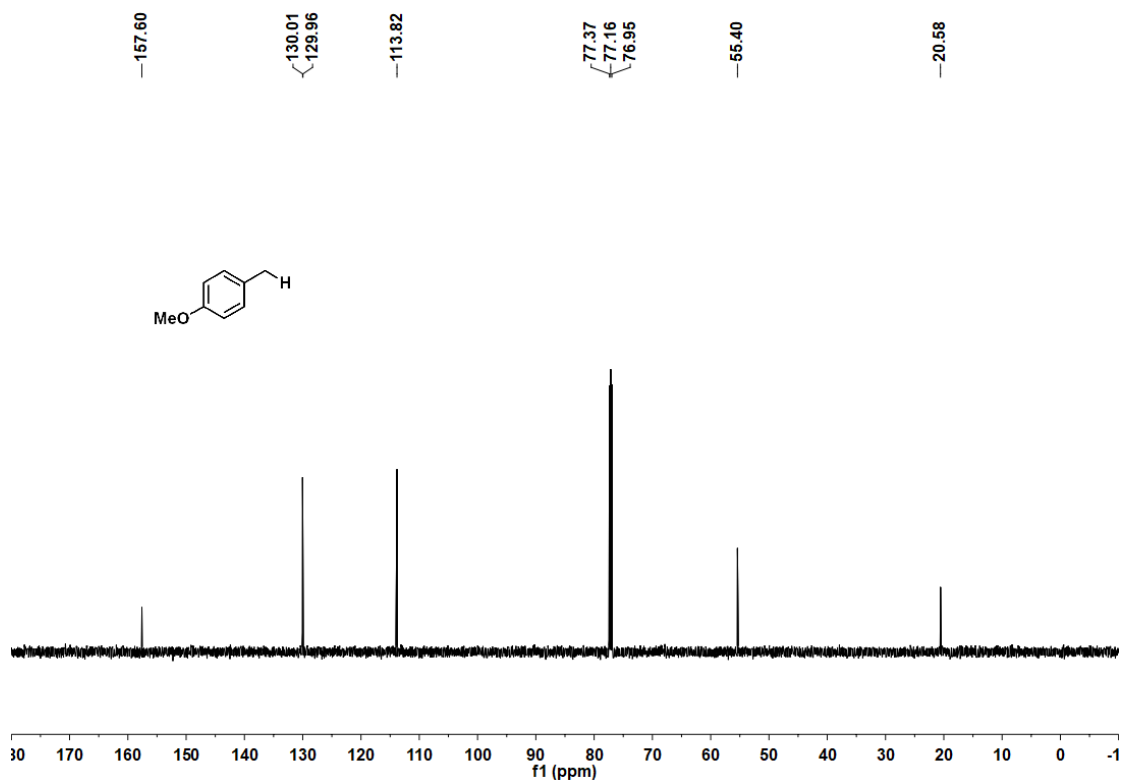

9,  $^1\text{H}$  NMR (600 MHz,  $\text{CDCl}_3$ );  $^{13}\text{C}$  NMR (150 MHz,  $\text{CDCl}_3$ )

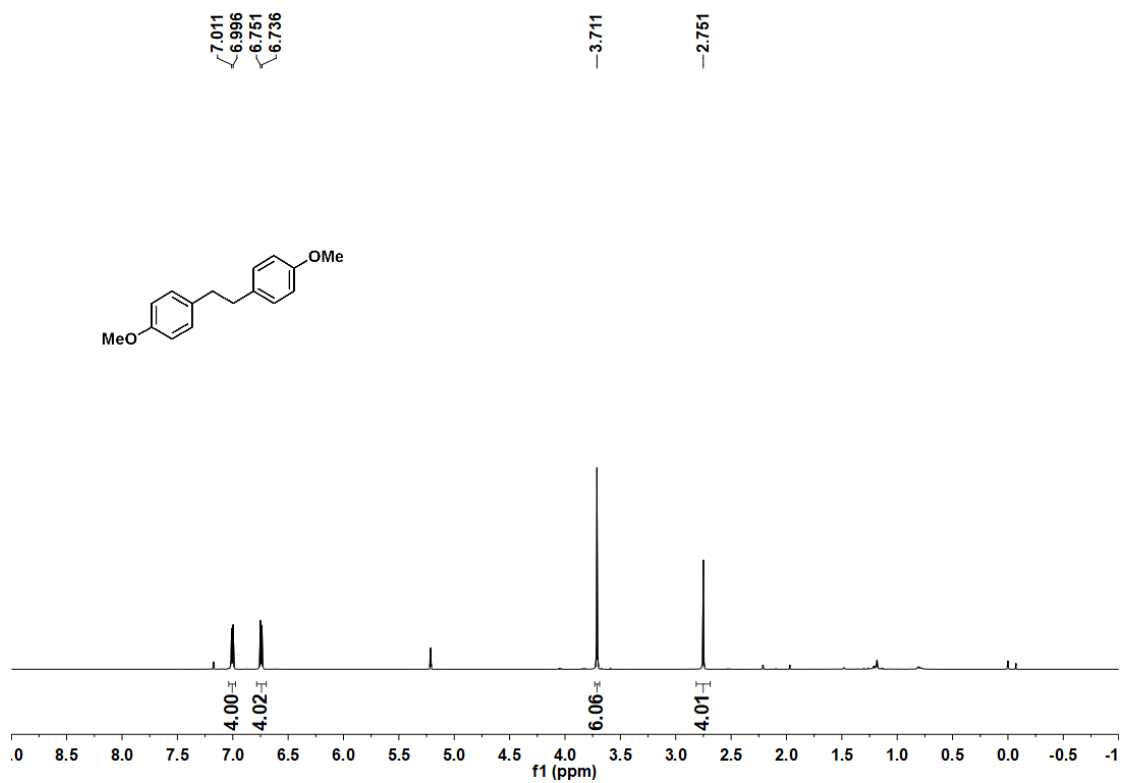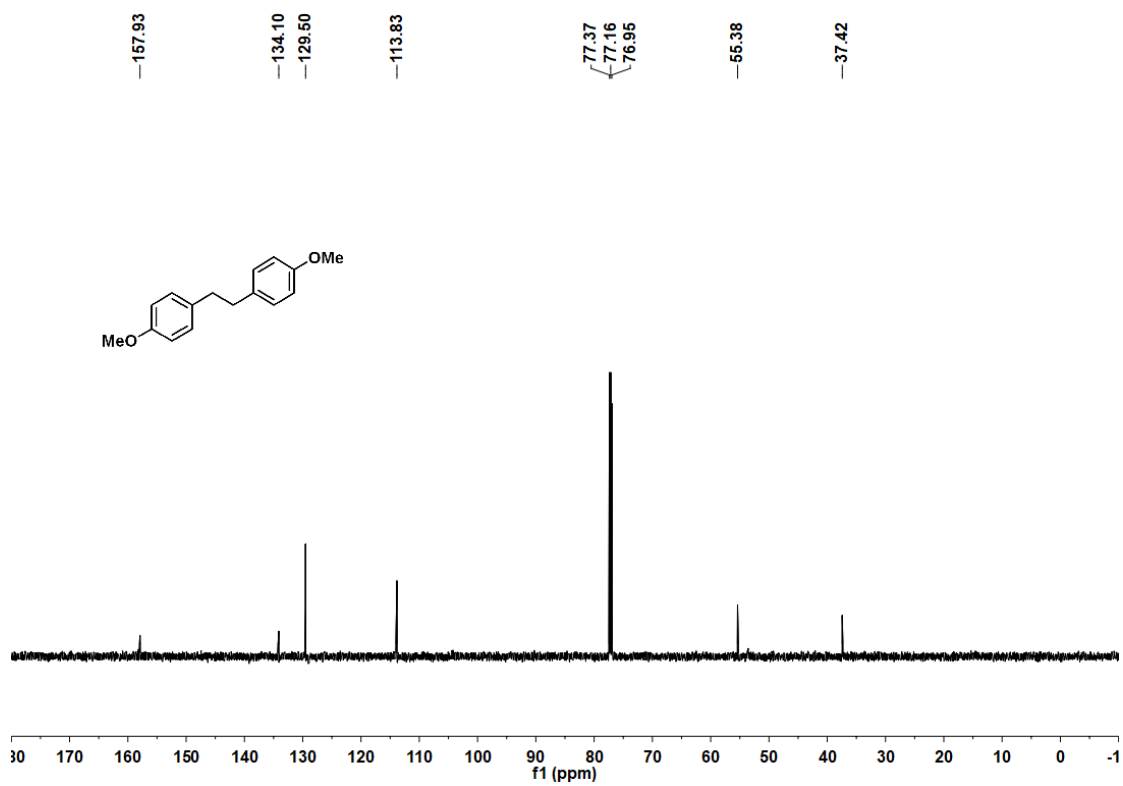

11,  $^1\text{H}$  NMR (600 MHz,  $\text{CDCl}_3$ );  $^{13}\text{C}$  NMR (150 MHz,  $\text{CDCl}_3$ )

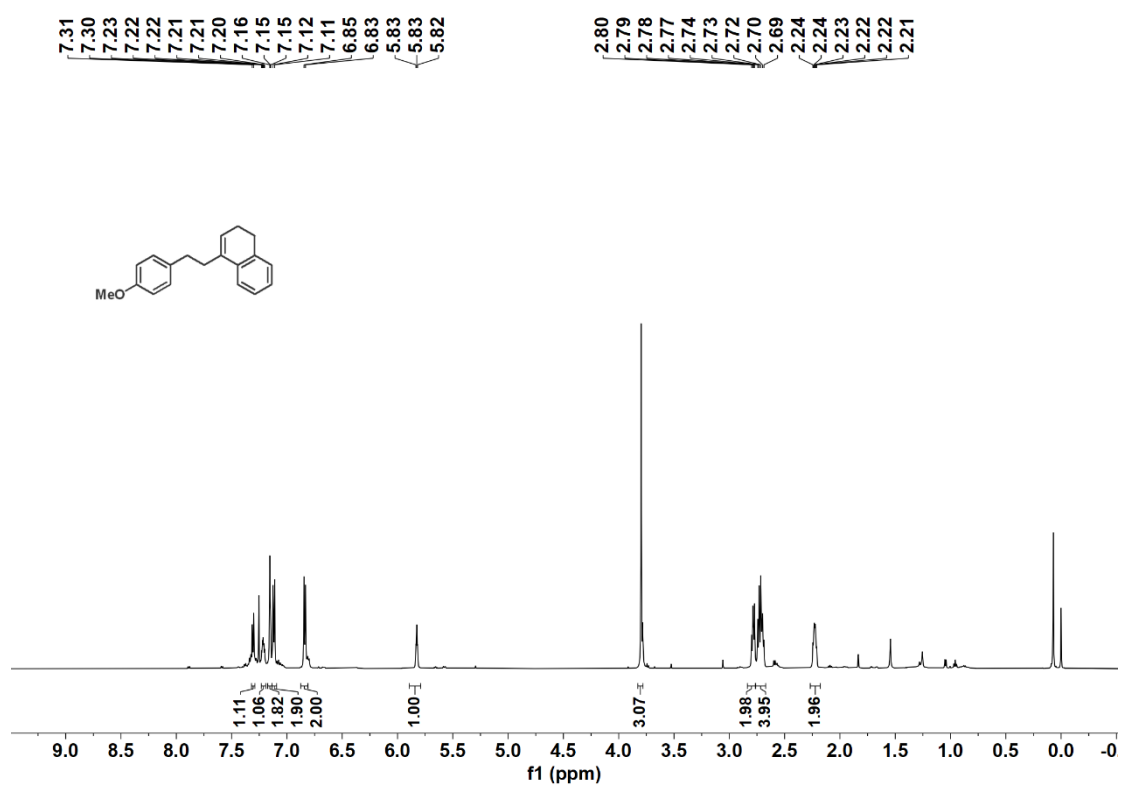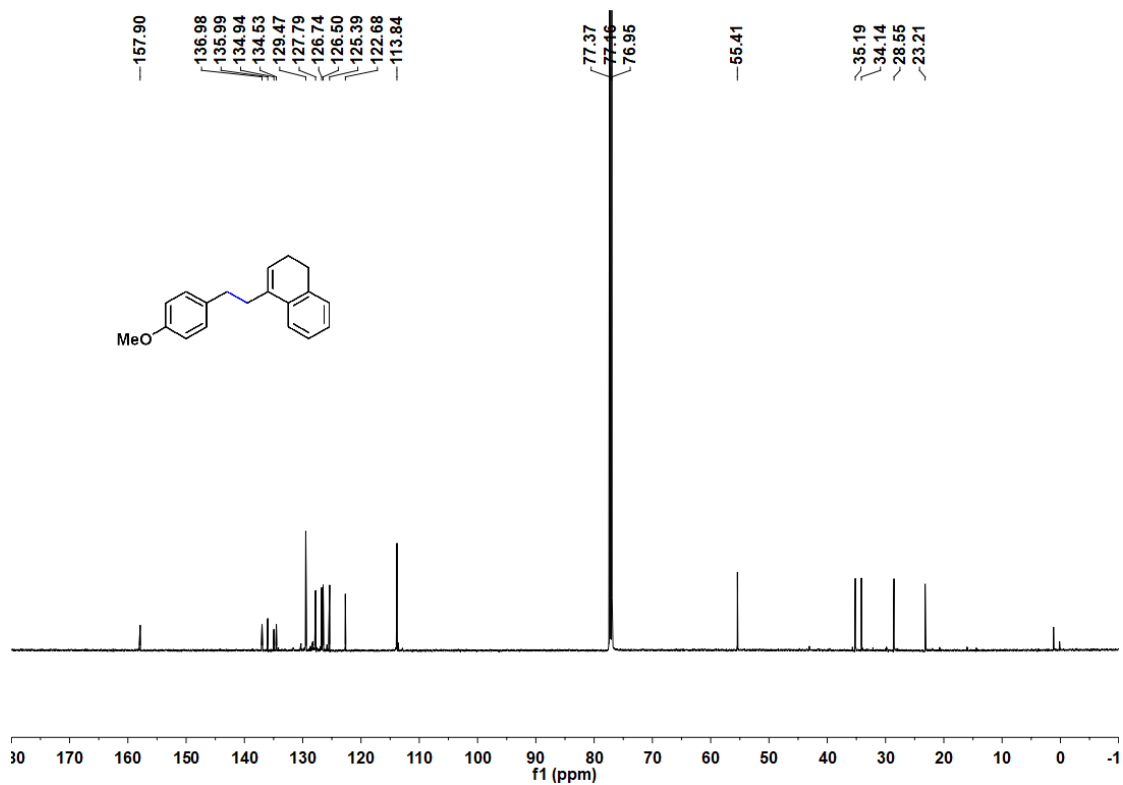

Supplement: d3qo01416a1.pdf [file d3qo01416a1.pdf]
